# Supplementary material for: A single-cell tumor immune atlas for precision oncology
Source: PubMed Central journal article supplement — Genome Res. 2021 Oct;31(10):1913–26. doi: 10.1101/gr.273300.120 (PMC8494216; doi:10.1101/gr.273300.120), 2021-10
Supplement: supp_gr.273300.120_Supplemental_Table_S1.pdf [file supp_gr.273300.120_Supplemental_Table_S1.pdf]

| Paper                    | Cancer type                                                              | # patients | # total cells | # immune cells | Sequencing technology | Experiment details (adapted from the papers' methods)                                                                                                                                                                                  |
|--------------------------|--------------------------------------------------------------------------|------------|---------------|----------------|-----------------------|----------------------------------------------------------------------------------------------------------------------------------------------------------------------------------------------------------------------------------------|
| Azizi et al. 2018        | breast carcinoma (BC)                                                    | 8          | 46,642        | 28,918         | inDrop                | Liberase TL (20min, 37°C).                                                                                                                                                                                                             |
| Yost et al. 2019         | basal cell carcinoma (BCC) and squamous cell carcinoma (SCC)             | 15         | 79,046        | 59,792         | 10x                   | Liberase TL and DNaseI GentleMACS C tube (37°C, 3h).                                                                                                                                                                                   |
| Lichun et al. 2019       | intrahepatic cholangiocarcinoma (ICC) and hepatocellular carcinoma (HCC) | 19         | 9,536         | 4,331          | 10x                   | GentleMACS C Tube, Tumor dissociation Kit using program h_tumor_01 (30min, 37°C).                                                                                                                                                      |
| Zhang et al. 2019        | intrahepatic cholangiocarcinoma (ICC) and hepatocellular carcinoma (HCC) | 16         | 20,393        | 17,242         | 10x and Smart-Seq2    | MACS tumor dissociation kit (30min, 37°C).                                                                                                                                                                                             |
| Lee et al. 2020          | colorectal cancer (CRC)                                                  | 43         | 63,689        | 31,367         | 10x                   | 1. For SMC samples GentleMACS C tubes (Enzymes H, R, and A, h_tumor_01, 02, and 03, 30min, 37°C).<br>2. For the KUL3 samples Collagenase P and DNase I, 10min, 37°C).<br>3. Singapore protocol Collagenase IV and DNases I (37°C, 1h). |
| Peng et al. 2019         | pancreatic ductal adenocarcinoma (PDAC)                                  | 24         | 41,986        | 10,623         | 10x                   | Type VIII Collagenase, Dispase II, Trypsin Inhibitor, DNaseI (37°C, 40min).                                                                                                                                                            |
| Schelker et al. 2017     | ovarian cancer (OC)                                                      | 4          | 2,765         | 2,432          | inDrop                |                                                                                                                                                                                                                                        |
| Lambrechts et al. 2018   | non-small-cell lung cancer (NSCLC)                                       | 5          | 24,908        | 17,077         | 10x                   | Collagenase I/II, DNaseI, Dispase (15min, 37°C).                                                                                                                                                                                       |
| Lavin et al. 2017        | non-small-cell lung cancer (NSCLC)                                       | 28         | 1,519         | 1,460          | MARS-Seq              | Collagenase type IV (45min, 37°C).                                                                                                                                                                                                     |
| Sade-Feldman et al. 2018 | melanoma                                                                 | 29         | 16,188        | 14,991         | Smart-Seq2            | Miltenyi Biotec enzyme H, R, A, (20min, 37°C).                                                                                                                                                                                         |
| Li et al. 2019           | melanoma                                                                 | 22         | 44,403        | 37,398         | MARS-Seq              | Collagenase IV and pulmozyme (20min, 37°C).                                                                                                                                                                                            |
| Durante et al. 2020      | uveal melanoma                                                           | 11         | 86,407        | 8,513          | 10x                   | GentleMACS C tubes Collagenase IV (program "h_tumor_01", 37°C, 1h, +program "h_tumor_03").                                                                                                                                             |

|                   |                                    |   |        |        |     |                                              |
|-------------------|------------------------------------|---|--------|--------|-----|----------------------------------------------|
| Wu et al.<br>2020 | colorectal cancer (CRC)            | 2 | 7,138  | 6,909  | 10x | Collagenase D and DNaseI<br>(15+10min, 37°C) |
|                   | non-small-cell lung cancer (NSCLC) | 6 | 39,323 | 35,107 |     |                                              |
|                   | endometrial adenocarcinoma (EA)    | 6 | 22,706 | 22,611 |     |                                              |
|                   | renal cell carcinoma (RCC)         | 3 | 19,612 | 18,340 |     |                                              |

**Supplementary Table 1 | Single-cell RNA-seq data used for the Tumor Immune Cell Atlas.**
