# Supplementary material for: A single-cell tumor immune atlas for precision oncology
Source: PubMed Central journal article supplement — Genome Res. 2021 Oct;31(10):1913–26. doi: 10.1101/gr.273300.120 (PMC8494216; doi:10.1101/gr.273300.120), 2021-10
Supplement: supp_gr.273300.120_Supplemental_Table_S3.pdf [file supp_gr.273300.120_Supplemental_Table_S3.pdf]

| <b>cell type</b>             | <b>markers</b>                                                                                                                             |
|------------------------------|--------------------------------------------------------------------------------------------------------------------------------------------|
| B cells (general)            | MS4A1, CD79A, CD79B, VPREB3, CD19                                                                                                          |
| B cells naive                | IGHM, IGHD, CCR7, SELL                                                                                                                     |
| B cells activated            | CD69, CD83, JUN, IRF4, MYC                                                                                                                 |
| B cells memory               | CD27, XBP1, CLEC2D, SSPN                                                                                                                   |
| B cells unswitched memory    | IGHM, IGHD, CD27, FCRL5                                                                                                                    |
| B cells proliferative        | TCL1A, CD79B, CD79A, MS4A1, MKI67                                                                                                          |
| Plasma B cells               | JCHAIN, IGHG1, IGK, IGHC, IGHM, IGHG3, IGKV1D-39, IGHG2, IGLC3, IGHG1, IGHG4, IGHV4-4, XBP1, CD79A, CD38, MZB1, SSR4, DERL3, FKBP11, PRDX4 |
| Plasma blast                 | IGHG1, IGHG4, JCHAIN, IGLC3, IGHG1, MZB1, IGK, IGHM, XBP1                                                                                  |
| CD4 memory stem cells        | IL7R, CCR7, TCF7, KLRB1, GPR183, SELL, LEF1, CXCR4, RORA, FOXP1, CCL5, CD3E, CXCR6                                                         |
| CD4 effector memory RA       | TXNIP, KLRD1, KLF2, PRF1, TRBC2, TRBC1, TGFBI, SPON2, CCL4, IL7R, TCF7, SPN, ITGAL, IL6ST, ZNF683                                          |
| CD4 activated                | DUSP2, CD69, JUN, JUNB                                                                                                                     |
| CD4 transitional memory      | CXCL13, TNFRSF4, TIGIT, IL6ST, PASK, KLRB1, CD40LG, TOX, LEF1, ICOS, CD28, TOX2, CCR7, CD247, RORA, PDCD1                                  |
| CD4 resident effector memory | KLRB1, IL7R, LTB, S100A4, RORA, CD40LG, CXCR6, CD69, IL32                                                                                  |
| CD8 activated                | IFI6, IFIT3, IFI44L, LY6E, IFI44, STAT1, IFI35, IRF7, IFITM1, IFI16, CD38, IFNG, GZMA, GZMK, CXCL13, CD69, RUNX3, IL32, IL2RG              |
| CD8 cytotoxic                | GZMK, DUSP2, CCL5, ANXA1, NKG7, FYN, XCL2, GZMM, EOMES, CCL4, GZMA, CXCR3, KLRG1, XCL1                                                     |
| CD8 exhausted                | CXCL13, LAG3, HAVCR2, TIGIT, PDCD1, PRF1, TOX                                                                                              |
| CD8 IFN activated            | IFITM1, IFITM3, NFKBIA, CD69, IFITM2, FOS, IL32                                                                                            |
| T cells regulatory           | TNFRSF4, FOXP3, TNFRSF18, BATF,                                                                                                            |

|                              |                                                                                                                                     |
|------------------------------|-------------------------------------------------------------------------------------------------------------------------------------|
|                              | IL2RA, IL32, TIGIT, LTB, CTLA4, ICOS                                                                                                |
| T cells proliferative        | HMGB2, MKI67, HMG2, TOP2A, CXCL13                                                                                                   |
| Th17/helper                  | IL17A, IL17F, BATF, IL2RA, DUSP4, IL21R, CTLA4, IRF4, CCL20, IL26, BATF3, IL4R, STAT3, RORA                                         |
| NK                           | GNLY, PRF1, NKG7, KLRD1, SPON2, CTSW, FCGR3A, GZMB, CX3CR1, CMC1, FOSL2, KLRC3, KLRC4                                               |
| Macrophages SPP1             | SPP1, APOE, C1QB, C1QA, APOC1, C1QC, HLA.DRA, CTSB, CD68, SELENOP, HLA.DRB1, HLA.DPB1, CD14, FCER1G, CD74, FCGR3A, CD163, MSR1, A2M |
| TAMs C1QC                    | C1QB, C1QA, C1QC, APOE, SELENOP, CD14, SPP1, CD68, CD163, CXCL2, CSF1R, FCGR3A, IL1B, PLTP, MRC1, SIRPA, CD40                       |
| Macrophages CXCL10           | CXCL10, IL1RN, CCL2, CCL8, CXCL11, LYZ, FCN1, S100A9, S100A8, CD68, CD14, SERPINA1, LILRB2, LGALS9, FCGR2A, IL1B, LILRB4, CD274     |
| Macro. and mono. prolif.     | SPP1, C1QC, C1QB, C1QA, PLTP, SELENOP, LYVE1                                                                                        |
| Monocytes tumor infiltrating | S100A9, S100A8, CXCL8, IL1B, CCL3L3, LYZ, G0S2, SOD2, CXCL2, CXCL3, CD14, CSF3R                                                     |
| DC1                          | HLA-DPA1, IDO1, C1orf54, CLEC9A, SERPINB1, XCR1                                                                                     |
| DC2 CD1C+                    | HLA-DRA, CST3, HLA-DPB1, HLA-DPA1, HLA-DQB1, FCER1A, CD1C                                                                           |
| DC3 LAMP3                    | FSCN1, LAMP3, CCR7, IDO1, HLA-DQA1, CD274                                                                                           |
| DC4 CD1C-                    | LST1, AIF1, SERPINA1, FCGR3A, LILRB2, CSF1R                                                                                         |
| pDC                          | IRF7, IRF8, TCF4, GZMB, IL3RA                                                                                                       |
| Mast cells                   | TPSB2, TPSAB1, KIT                                                                                                                  |

**Supplementary Table 3 | Most relevant markers for the annotated cell types (level 2, 31 clusters)**
