# Supplementary material for: A single-cell tumor immune atlas for precision oncology
Source: HighWire-hosted journal article supplement (doi:10.1101/gr.273300.120), 2021-09-21
Supplement: Supplemental_Code_Tumor-Immune-Cell-Atlas-github.zip [file supp_table_2.xlsx]

## Sheet: B cells
p_val	avg_logFC	pct.1	pct.2	p_val_adj	cluster	gene
0	0.315601	0.985	0.945	0	B cells	RPS12
0	0.323803	0.962	0.902	0	B cells	RPS15
0	0.330498	0.962	0.878	0	B cells	RPS16
0	0.330655	0.938	0.868	0	B cells	RPL14
0	0.33184	0.969	0.912	0	B cells	RPL37
0	0.344863	0.988	0.949	0	B cells	RPL13
0	0.366001	0.957	0.894	0	B cells	FAU
0	0.369449	0.952	0.889	0	B cells	RPL35A
0	0.376187	0.953	0.881	0	B cells	RPL15
0	0.376794	0.978	0.93	0	B cells	RPS14
0	0.377312	0.925	0.848	0	B cells	RPL29
0	0.382526	0.945	0.846	0	B cells	RPL5
0	0.401103	0.99	0.964	0	B cells	MALAT1
0	0.405239	0.978	0.926	0	B cells	RPL30
0	0.405804	0.974	0.926	0	B cells	RPS27A
0	0.40761	0.958	0.888	0	B cells	RPL18
0	0.410034	0.894	0.652	0	B cells	CD52
0	0.410555	0.954	0.882	0	B cells	RPS13
0	0.41477	0.875	0.699	0	B cells	EEF2
0	0.415146	0.982	0.932	0	B cells	RPL19
0	0.420693	0.282	0.042	0	B cells	IGHM
0	0.423798	0.918	0.853	0	B cells	RPL3
0	0.425949	0.953	0.886	0	B cells	RPS25
0	0.430731	0.956	0.891	0	B cells	RPL12
0	0.431794	0.916	0.739	0	B cells	GNB2L1
0	0.43362	0.863	0.732	0	B cells	RPL22
0	0.434709	0.977	0.928	0	B cells	RPS18
0	0.438737	0.884	0.7	0	B cells	LAPTM5
0	0.448781	0.964	0.887	0	B cells	RPL8
0	0.4525	0.904	0.844	0	B cells	RPL18A
0	0.462615	0.979	0.924	0	B cells	RPL11
0	0.468382	0.706	0.347	0	B cells	LTB
0	0.470494	0.896	0.833	0	B cells	RPS3A
0	0.47202	0.885	0.779	0	B cells	RPL39
0	0.473864	0.708	0.474	0	B cells	GLTSCR2
0	0.47599	0.148	0.006	0	B cells	AC079767.4
0	0.478955	0.916	0.844	0	B cells	EEF1A1
0	0.481953	0.935	0.82	0	B cells	RPL10A
0	0.482249	0.267	0.068	0	B cells	BCAS4
0	0.484115	0.171	0.014	0	B cells	STAP1
0	0.486595	0.986	0.934	0	B cells	RPLP2
0	0.487839	0.972	0.923	0	B cells	RPL34
0	0.488422	0.951	0.817	0	B cells	RPS11
0	0.494139	0.906	0.789	0	B cells	RPSA
0	0.496787	0.881	0.794	0	B cells	RPL9
0	0.497651	0.977	0.922	0	B cells	RPL32
0	0.497683	0.23	0.053	0	B cells	FGD2
0	0.51315	0.429	0.181	0	B cells	CTSH
0	0.51336	0.297	0.091	0	B cells	TPD52
0	0.514599	0.173	0.014	0	B cells	AFF3
0	0.521904	0.965	0.881	0	B cells	RPL23A
0	0.524334	0.202	0.02	0	B cells	COBLL1
0	0.527745	0.396	0.154	0	B cells	SYPL1
0	0.531893	0.254	0.052	0	B cells	AIM2
0	0.532377	0.977	0.911	0	B cells	RPS6
0	0.534781	0.461	0.222	0	B cells	TMEM243
0	0.541773	0.257	0.064	0	B cells	PLCG2
0	0.543083	0.179	0.004	0	B cells	RP11.693J15.5
0	0.543136	0.294	0.068	0	B cells	PARP15
0	0.543927	0.182	0.01	0	B cells	TLR10
0	0.552311	0.316	0.099	0	B cells	CCDC50
0	0.559049	0.205	0.022	0	B cells	CPNE5
0	0.565437	0.257	0.046	0	B cells	BTK
0	0.56736	0.258	0.042	0	B cells	CLECL1
0	0.567666	0.338	0.11	0	B cells	STX7
0	0.56886	0.942	0.834	0	B cells	RPS5
0	0.571537	0.359	0.118	0	B cells	NCF1
0	0.583383	0.235	0.044	0	B cells	SCIMP
0	0.590755	0.322	0.096	0	B cells	ORAI2
0	0.590826	0.245	0.054	0	B cells	HLA.DOA
0	0.594679	0.409	0.164	0	B cells	SNX2
0	0.598385	0.172	0.003	0	B cells	FCRL1
0	0.601565	0.349	0.11	0	B cells	ST6GAL1
0	0.612487	0.931	0.803	0	B cells	RPL13A
0	0.614655	0.467	0.179	0	B cells	SELL
0	0.618528	0.229	0.019	0	B cells	CXCR5
0	0.619379	0.195	0.01	0	B cells	FAM129C
0	0.624283	0.661	0.366	0	B cells	HLA.DPA1
0	0.634184	0.145	0.003	0	B cells	RP5.887A10.1
0	0.636922	0.885	0.702	0	B cells	EEF1B2
0	0.63934	0.451	0.139	0	B cells	HLA.DMB
0	0.642741	0.552	0.283	0	B cells	REL
0	0.645783	0.284	0.041	0	B cells	PDLIM1
0	0.65669	0.202	0.008	0	B cells	TNFRSF13C
0	0.66194	0.248	0.004	0	B cells	EBF1
0	0.662853	0.319	0.068	0	B cells	LY86
0	0.667094	0.83	0.752	0	B cells	RPL21
0	0.673417	0.971	0.895	0	B cells	RPS23
0	0.67657	0.366	0.092	0	B cells	LAT2
0	0.676792	0.657	0.359	0	B cells	HLA.DPB1
0	0.677941	0.347	0.105	0	B cells	ID3
0	0.684072	0.193	0.004	0	B cells	PAX5
0	0.688337	0.278	0.033	0	B cells	GNG7
0	0.69341	0.281	0.036	0	B cells	BLNK
0	0.697374	0.239	0.019	0	B cells	HLA.DOB
0	0.698399	0.282	0.024	0	B cells	PKIG
0	0.700101	0.987	0.919	0	B cells	RPS8
0	0.706287	0.647	0.264	0	B cells	HLA.DMA
0	0.718888	0.284	0.015	0	B cells	KIAA0226L
0	0.724766	0.233	0.018	0	B cells	BCL11A
0	0.758167	0.248	0.012	0	B cells	CD24
0	0.777107	0.334	0.059	0	B cells	MARCH1
0	0.787112	0.215	0.005	0	B cells	FCER2
0	0.792568	0.434	0.122	0	B cells	POU2F2
0	0.808119	0.291	0.018	0	B cells	SPIB
0	0.832852	0.334	0.04	0	B cells	POU2AF1
0	0.845942	0.316	0.012	0	B cells	TNFRSF13B
0	0.867716	0.386	0.061	0	B cells	TCF4
0	0.87254	0.353	0.046	0	B cells	HVCN1
0	0.877314	0.382	0.052	0	B cells	CD40
0	0.89768	0.257	0.034	0	B cells	NAPSB
0	0.936542	0.159	0.009	0	B cells	TCL1A
0	0.945252	0.324	0.011	0	B cells	FCRLA
0	0.947949	0.368	0.012	0	B cells	BLK
0	0.951617	0.391	0.1	0	B cells	LY9
0	0.955291	0.762	0.427	0	B cells	HLA.DRB1
0	0.964123	0.433	0.137	0	B cells	CCR7
0	0.977583	0.427	0.059	0	B cells	SWAP70
0	0.994553	0.302	0.009	0	B cells	CD22
0	0.995921	0.353	0.026	0	B cells	RALGPS2
0	1.00444	0.417	0.048	0	B cells	ADAM28
0	1.01746	0.71	0.327	0	B cells	HLA.DRA
0	1.0214	0.404	0.017	0	B cells	ARHGAP24
0	1.03026	0.639	0.328	0	B cells	SYNGR2
0	1.06831	0.414	0.013	0	B cells	CD19
0	1.08648	0.531	0.079	0	B cells	IRF8
0	1.0923	0.506	0.092	0	B cells	MEF2C
0	1.13654	0.479	0.248	0	B cells	HLA.DRB5
0	1.13917	0.918	0.564	0	B cells	CD37
0	1.1527	0.991	0.811	0	B cells	CD74
0	1.18037	0.481	0.074	0	B cells	SMIM14
0	1.19137	0.434	0.006	0	B cells	LINC00926
0	1.2109	0.81	0.282	0	B cells	HLA.DQB1
0	1.24142	0.519	0.074	0	B cells	CD79B
0	1.25658	0.345	0.009	0	B cells	VPREB3
0	1.35142	0.586	0.205	0	B cells	HLA.DQA1
0	1.50902	0.598	0.013	0	B cells	BANK1
0	1.62797	0.623	0.156	0	B cells	CD83
0	2.0717	0.857	0.061	0	B cells	CD79A
0	2.53285	0.847	0.024	0	B cells	MS4A1
1.30468e-307	0.694209	0.293	0.092	1.14367e-302	B cells	FAIM3
2.18594e-306	0.316989	0.936	0.866	1.91617e-301	B cells	RPL36
2.6894e-302	0.593049	0.276	0.083	2.3575e-297	B cells	NFKBID
1.08248e-301	0.593844	0.198	0.034	9.48894e-297	B cells	CD72
3.12063e-299	0.546935	0.255	0.067	2.73551e-294	B cells	IFT57
1.38115e-297	0.501133	0.147	0.011	1.21071e-292	B cells	KIAA0125
1.02172e-296	0.466055	0.146	0.01	8.95628e-292	B cells	FCRL2
4.89815e-296	0.498636	0.233	0.054	4.29367e-291	B cells	PHACTR1
2.77471e-295	0.488072	0.275	0.083	2.43228e-290	B cells	PLEKHF2
4.088e-295	0.314386	0.946	0.871	3.5835e-290	B cells	RPL7A
6.79964e-292	0.774112	0.132	0.002	5.96049e-287	B cells	IGHD
4.58348e-289	0.478986	0.192	0.032	4.01783e-284	B cells	GAPT
5.48933e-289	0.40481	0.157	0.015	4.8119e-284	B cells	PLEKHG1
1.82031e-287	0.281836	0.943	0.881	1.59566e-282	B cells	RPS7
5.92161e-284	0.476711	0.381	0.16	5.19082e-279	B cells	FAM65B
6.86598e-283	0.541431	0.22	0.051	6.01865e-278	B cells	CIITA
1.27574e-278	0.522735	0.337	0.133	1.1183e-273	B cells	DRAM2
1.32325e-276	0.492694	0.177	0.026	1.15995e-271	B cells	WDFY4
8.20307e-272	0.401315	0.158	0.019	7.19073e-267	B cells	C1orf186
6.60963e-270	0.410813	0.207	0.041	5.79394e-265	B cells	RIC3
3.10762e-268	0.536695	0.268	0.089	2.72411e-263	B cells	CYB561A3
4.92541e-267	0.538195	0.264	0.083	4.31757e-262	B cells	SYK
4.88204e-266	0.305725	0.905	0.773	4.27955e-261	B cells	RPL4
5.635e-265	0.314398	0.123	0.005	4.93959e-260	B cells	TEX9
2.14986e-263	0.285566	0.957	0.87	1.88455e-258	B cells	RPL37A
5.08701e-263	0.448297	0.298	0.111	4.45922e-258	B cells	IFNGR2
3.17563e-260	0.462094	0.258	0.082	2.78373e-255	B cells	DAPP1
9.00345e-260	0.306877	0.926	0.855	7.89234e-255	B cells	RPS9
2.66596e-255	0.476129	0.245	0.071	2.33696e-250	B cells	BASP1
6.73263e-255	0.485487	0.414	0.203	5.90176e-250	B cells	RCSD1
2.32055e-254	0.418503	0.27	0.095	2.03417e-249	B cells	UVRAG
1.10486e-253	0.314217	0.95	0.914	9.68509e-249	B cells	RPL10
6.41315e-251	0.379889	0.694	0.489	5.62171e-246	B cells	ZFAS1
7.89591e-251	0.410775	0.193	0.037	6.92148e-246	B cells	TFEB
1.12729e-249	0.376022	0.119	0.004	9.8817e-245	B cells	CNR2
2.4368e-246	0.427445	0.697	0.495	2.13607e-241	B cells	ZFP36L1
3.34651e-245	0.471864	0.212	0.049	2.93352e-240	B cells	FCRL3
1.78967e-242	0.275889	0.951	0.866	1.56881e-237	B cells	RPS21
6.83226e-242	0.484564	0.446	0.232	5.98909e-237	B cells	CD55
9.02307e-241	0.436757	0.43	0.219	7.90953e-236	B cells	CD82
8.70321e-240	0.473691	0.216	0.059	7.62914e-235	B cells	FCMR
4.83396e-239	0.427596	0.246	0.077	4.2374e-234	B cells	PIKFYVE
1.415e-238	0.349666	0.957	0.886	1.24037e-233	B cells	RPL26
6.46962e-232	0.415428	0.16	0.028	5.6712e-227	B cells	AKAP2
4.71846e-231	0.421385	0.238	0.076	4.13615e-226	B cells	TMEM154
1.42807e-229	0.253914	0.966	0.917	1.25183e-224	B cells	RPS3
2.88898e-229	0.360444	0.699	0.508	2.53245e-224	B cells	SLC25A6
8.02167e-226	0.419561	0.296	0.109	7.03171e-221	B cells	SESN3
2.75978e-225	0.417515	0.439	0.244	2.4192e-220	B cells	POLD4
7.93936e-225	0.414117	0.107	0.003	6.95956e-220	B cells	CR2
1.447e-223	0.434942	0.848	0.694	1.26842e-218	B cells	RPS20
8.6197e-223	0.406107	0.156	0.029	7.55594e-218	B cells	CD180
6.97923e-222	0.251533	0.923	0.839	6.11793e-217	B cells	UBA52
8.25473e-222	0.376293	0.228	0.071	7.23602e-217	B cells	METTL21A
1.41127e-220	0.384323	0.467	0.26	1.2371e-215	B cells	TNFAIP8
2.68898e-218	0.284267	0.582	0.377	2.35713e-213	B cells	CD48
7.63447e-218	0.269875	0.783	0.561	6.6923e-213	B cells	TXNIP
3.98015e-213	0.324784	0.954	0.911	3.48896e-208	B cells	RPS27
1.08461e-212	0.382664	0.645	0.442	9.50761e-208	B cells	EZR
1.0127e-207	0.452696	0.149	0.028	8.87721e-203	B cells	FCRL5
1.01515e-207	0.408733	0.321	0.139	8.89871e-203	B cells	NCOA3
6.58533e-207	0.383788	0.17	0.041	5.77263e-202	B cells	QRSL1
2.56983e-206	0.401266	0.101	0.004	2.25269e-201	B cells	CTA.250D10.23
1.01663e-205	0.361106	0.275	0.104	8.91167e-201	B cells	ZBTB20
5.26261e-205	0.411802	0.192	0.047	4.61315e-200	B cells	BACH2
3.7442e-201	0.423105	0.171	0.046	3.28213e-196	B cells	CXXC5
2.81903e-198	0.254989	0.931	0.837	2.47113e-193	B cells	RPLP0
7.73535e-198	0.467863	0.246	0.097	6.78073e-193	B cells	TSPAN3
2.66217e-197	0.401639	0.303	0.125	2.33363e-192	B cells	STAT6
1.86894e-194	0.297473	0.58	0.388	1.63829e-189	B cells	PNISR
2.39152e-194	0.337473	0.196	0.056	2.09638e-189	B cells	KYNU
3.50923e-193	0.461939	0.809	0.678	3.07616e-188	B cells	RPL7
8.73816e-192	0.390407	0.343	0.153	7.65979e-187	B cells	SP140
2.60095e-191	0.361474	0.455	0.269	2.27997e-186	B cells	EIF2S3
1.37735e-190	0.368729	0.258	0.106	1.20737e-185	B cells	FAM60A
1.48163e-186	0.299302	0.647	0.469	1.29878e-181	B cells	EIF3E
1.79507e-185	0.321224	0.895	0.779	1.57354e-180	B cells	RPL41
2.5956e-185	0.366126	0.144	0.026	2.27528e-180	B cells	HHEX
5.9729e-184	0.342193	0.234	0.083	5.23578e-179	B cells	RASGRP2
4.05143e-183	0.283566	0.183	0.044	3.55144e-178	B cells	FAM159A
9.50003e-181	0.384745	0.304	0.142	8.32763e-176	B cells	PRDM2
2.75976e-180	0.341364	0.191	0.058	2.41917e-175	B cells	IRF5
1.76367e-179	0.407623	0.323	0.159	1.54601e-174	B cells	SMARCB1
4.62551e-179	0.458451	0.152	0.034	4.05467e-174	B cells	STAG3
4.66276e-179	0.368632	0.395	0.214	4.08733e-174	B cells	PTPN6
1.39767e-177	0.374967	0.326	0.166	1.22518e-172	B cells	PPM1K
7.69039e-177	0.415119	0.325	0.155	6.74132e-172	B cells	SP110
1.343e-175	0.363764	0.209	0.072	1.17726e-170	B cells	MTSS1
2.5424e-174	0.337924	0.917	0.808	2.22864e-169	B cells	RPL31
1.58041e-172	0.301361	0.13	0.025	1.38537e-167	B cells	MICAL3
1.82314e-172	0.375495	0.185	0.057	1.59815e-167	B cells	RAB30
6.34017e-171	0.324265	0.156	0.042	5.55773e-166	B cells	CHD7
1.13471e-170	0.261284	0.12	0.022	9.94672e-166	B cells	SEMA7A
2.68964e-167	0.356245	0.185	0.06	2.35771e-162	B cells	CD70
8.62519e-166	0.330598	0.174	0.056	7.56075e-161	B cells	INPP5F
1.85439e-162	0.323982	0.546	0.351	1.62554e-157	B cells	BIRC3
1.86131e-162	0.320267	0.109	0.017	1.6316e-157	B cells	PNOC
3.88843e-162	0.333873	0.213	0.075	3.40856e-157	B cells	CCR6
3.92555e-162	0.369802	0.211	0.075	3.4411e-157	B cells	KIAA0922
1.17999e-161	0.488001	0.651	0.598	1.03436e-156	B cells	RPS28
1.35824e-161	0.335721	0.52	0.363	1.19062e-156	B cells	SNX3
3.38107e-161	0.275361	0.538	0.329	2.96382e-156	B cells	PTPRCAP
5.30168e-160	0.310924	0.165	0.047	4.6474e-155	B cells	KDM4B
2.50749e-159	0.34902	0.329	0.162	2.19804e-154	B cells	PARP14
3.67492e-159	0.281927	0.117	0.022	3.2214e-154	B cells	NUAK2
7.95651e-158	0.31145	0.194	0.068	6.9746e-153	B cells	FCGR2B
1.00907e-157	0.254374	0.923	0.83	8.84544e-153	B cells	RPL27
8.25576e-157	0.331184	0.116	0.023	7.23692e-152	B cells	CDCA7L
1.25805e-156	0.321313	0.168	0.051	1.10279e-151	B cells	BTLA
4.98725e-156	0.334262	0.14	0.038	4.37177e-151	B cells	RASGRP3
1.27183e-155	0.3505	0.215	0.09	1.11487e-150	B cells	ZCCHC7
1.27608e-155	0.366693	0.269	0.128	1.1186e-150	B cells	MBD4
3.86621e-155	0.341755	0.186	0.063	3.38908e-150	B cells	ALOX5
1.09322e-152	0.389929	0.457	0.28	9.58306e-148	B cells	RPS4Y1
1.90541e-152	0.278223	0.121	0.027	1.67026e-147	B cells	FADS3
9.13142e-152	0.308959	0.376	0.213	8.00451e-147	B cells	ANKRD44
6.15374e-151	0.32361	0.466	0.301	5.39431e-146	B cells	C11orf31
2.08105e-150	0.32931	0.429	0.253	1.82423e-145	B cells	CNPY3
5.10266e-150	0.365977	0.25	0.108	4.47294e-145	B cells	KIAA1033
1.25441e-149	0.369436	0.918	0.826	1.0996e-144	B cells	RPL27A
4.48759e-149	0.308784	0.24	0.113	3.93377e-144	B cells	SH3BP5
6.10073e-147	0.320785	0.378	0.217	5.34784e-142	B cells	ITSN2
2.90085e-146	0.333455	0.189	0.068	2.54285e-141	B cells	TMEM156
8.11306e-146	0.346282	0.142	0.04	7.11183e-141	B cells	STRBP
9.33579e-146	0.30822	0.218	0.091	8.18366e-141	B cells	HLA.DQA2
3.80368e-144	0.325627	0.148	0.042	3.33426e-139	B cells	FAM65A
2.709e-143	0.277934	0.523	0.347	2.37469e-138	B cells	SP100
2.46853e-141	0.285227	0.106	0.021	2.16389e-136	B cells	CDK14
3.48774e-139	0.294202	0.191	0.071	3.05732e-134	B cells	FAM49A
1.17238e-138	0.496334	0.186	0.069	1.0277e-133	B cells	MYC
1.36826e-138	0.270127	0.536	0.38	1.1994e-133	B cells	EIF3L
2.2083e-136	0.290004	0.162	0.058	1.93578e-131	B cells	CLIC4
4.21131e-136	0.289391	0.313	0.174	3.69159e-131	B cells	SKIL
5.60857e-136	0.319427	0.463	0.305	4.91642e-131	B cells	TCEA1
4.74662e-128	0.273645	0.194	0.078	4.16084e-123	B cells	GNB5
3.69558e-127	0.285678	0.436	0.284	3.23951e-122	B cells	TAF1D
5.07136e-127	0.315803	0.229	0.1	4.4455e-122	B cells	HSH2D
9.61265e-127	0.299976	0.301	0.16	8.42635e-122	B cells	LMBRD1
1.05445e-126	0.28494	0.238	0.115	9.24319e-122	B cells	SKAP2
1.06201e-126	0.337123	0.78	0.666	9.30945e-122	B cells	HSP90AB1
2.22001e-126	0.366813	0.109	0.027	1.94604e-121	B cells	SNX22
1.05867e-123	0.271629	0.215	0.096	9.28021e-119	B cells	TRAF5
1.27885e-123	0.33322	0.332	0.187	1.12102e-118	B cells	HSPA4
7.13266e-123	0.294182	0.389	0.231	6.25242e-118	B cells	PARP1
3.64825e-121	0.287456	0.14	0.043	3.19802e-116	B cells	TSPAN13
8.1962e-121	0.413797	0.463	0.327	7.18471e-116	B cells	NBEAL1
1.57225e-120	0.277472	0.387	0.225	1.37821e-115	B cells	IL16
1.83699e-119	0.343079	0.225	0.11	1.61028e-114	B cells	SEL1L3
9.07575e-119	0.266634	0.167	0.061	7.95571e-114	B cells	PRKD3
2.40998e-118	0.297856	0.302	0.166	2.11257e-113	B cells	GGA2
2.75144e-114	0.259735	0.514	0.391	2.41188e-109	B cells	ST13
3.56893e-114	0.270664	0.269	0.144	3.12849e-109	B cells	ZCCHC11
5.3578e-113	0.347749	0.165	0.063	4.69659e-108	B cells	FCHSD2
7.48372e-113	0.398253	0.106	0.028	6.56015e-108	B cells	P2RX5
1.89618e-111	0.266637	0.493	0.352	1.66217e-106	B cells	GDI2
1.16691e-108	0.293989	0.169	0.072	1.0229e-103	B cells	PXK
3.59425e-108	0.267339	0.166	0.069	3.15068e-103	B cells	SMC6
3.71724e-108	0.297272	0.307	0.175	3.2585e-103	B cells	INPP5D
2.88698e-107	0.313476	0.202	0.094	2.5307e-102	B cells	DNAJC10
2.37024e-106	0.251726	0.237	0.121	2.07773e-101	B cells	PLAC8
3.42079e-106	0.276678	0.299	0.174	2.99863e-101	B cells	ATP2B1
5.70805e-106	0.285322	0.196	0.091	5.00362e-101	B cells	EIF1AY
4.69778e-104	0.308015	0.146	0.054	4.11802e-99	B cells	SNX29
1.13099e-103	0.298918	0.325	0.203	9.91414e-99	B cells	C6orf48
4.19945e-103	0.274517	0.18	0.084	3.68119e-98	B cells	KLHL6
2.34516e-101	0.303076	0.2	0.097	2.05574e-96	B cells	LRMP
6.32007e-101	0.320499	0.124	0.038	5.54011e-96	B cells	NCF1C
1.06852e-99	0.405004	0.451	0.322	9.36651e-95	B cells	EEF1G
1.69857e-99	0.293491	0.242	0.132	1.48895e-94	B cells	PRKCB
3.5946e-98	0.334835	0.325	0.206	3.15099e-93	B cells	CHORDC1
1.69191e-93	0.264593	0.35	0.22	1.48311e-88	B cells	MYCBP2
2.53573e-92	0.273114	0.152	0.064	2.2228e-87	B cells	DMXL1
7.99546e-91	0.281698	0.132	0.045	7.00874e-86	B cells	MGAT5
2.91109e-90	0.261145	0.226	0.12	2.55183e-85	B cells	NGLY1
3.78432e-90	0.293957	0.109	0.035	3.31729e-85	B cells	ARHGEF18
2.64999e-88	0.25852	0.378	0.255	2.32295e-83	B cells	PDE4B
4.06148e-88	0.277233	0.371	0.238	3.56025e-83	B cells	FOXP1
8.85851e-88	0.290518	0.118	0.04	7.76528e-83	B cells	DOK3
3.47858e-86	0.512932	0.148	0.062	3.04929e-81	B cells	LOC100996809
3.55611e-86	0.278677	0.128	0.048	3.11725e-81	B cells	RABEP2
8.17506e-81	0.298327	0.125	0.054	7.16617e-76	B cells	EAF2
5.34727e-79	0.269709	0.599	0.515	4.68737e-74	B cells	MT.ND3
9.85282e-78	0.253664	0.151	0.07	8.63689e-73	B cells	ANKRD13A
1.85699e-73	0.61382	0.203	0.103	1.62782e-68	B cells	MIR155HG
2.01932e-70	0.294461	0.284	0.187	1.77012e-65	B cells	FKBP4
3.13515e-70	0.259395	0.322	0.211	2.74824e-65	B cells	PTPN1
1.6652e-67	0.378297	0.15	0.073	1.4597e-62	B cells	HLA.DRB4
1.63512e-63	0.471238	0.179	0.096	1.43333e-58	B cells	ND6
8.95303e-62	0.26268	0.604	0.533	7.84813e-57	B cells	MT.CO2
1.81825e-57	0.346917	0.281	0.184	1.59386e-52	B cells	GAS5
3.37633e-53	0.278811	0.206	0.127	2.95966e-48	B cells	SYVN1
4.90041e-51	0.270997	0.667	0.551	4.29565e-46	B cells	RPS17
1.99891e-49	0.645868	0.258	0.189	1.75222e-44	B cells	ND5
4.12576e-48	0.380563	0.461	0.39	3.6166e-43	B cells	MT.ND4L
4.28398e-48	0.277252	0.95	0.875	3.75529e-43	B cells	RPS2
1.16659e-42	0.255258	0.534	0.463	1.02262e-37	B cells	H3F3A
3.00594e-41	0.934899	0.269	0.225	2.63497e-36	B cells	ND4L
3.23744e-28	0.679431	0.268	0.226	2.83791e-23	B cells	ATP8
2.04039e-25	0.783669	0.269	0.227	1.78859e-20	B cells	RNR1
7.4388e-18	0.871981	0.272	0.25	6.52078e-13	B cells	RNR2
2.46813e-17	0.772311	0.272	0.263	2.16354e-12	B cells	CYTB
2.87717e-17	0.274232	0.543	0.504	2.5221e-12	B cells	RPS10
1.50469e-15	0.530951	0.262	0.233	1.31899e-10	B cells	ND1
6.05661e-13	0.286061	0.259	0.228	5.30916e-08	B cells	ND2
1.00017e-12	0.750241	0.275	0.28	8.76738e-08	B cells	COX3
3.55716e-08	0.636452	0.273	0.282	0.00311817	B cells	ATP6

## Sheet: Proliferative B cells
p_val	avg_logFC	pct.1	pct.2	p_val_adj	cluster	gene
0	0.268619	0.255	0.013	0	Proliferative B cells	RAD51
0	0.26879	0.224	0.006	0	Proliferative B cells	RP11.304L19.5
0	0.272063	0.228	0.005	0	Proliferative B cells	TAP2.1
0	0.281454	0.266	0.013	0	Proliferative B cells	PKMYT1
0	0.285895	0.205	0.004	0	Proliferative B cells	HIST1H3G
0	0.286482	0.254	0.012	0	Proliferative B cells	KIF2C
0	0.292072	0.237	0.006	0	Proliferative B cells	REG3A
0	0.299553	0.241	0.003	0	Proliferative B cells	A4GALT
0	0.299866	0.186	0.003	0	Proliferative B cells	SYBU
0	0.304158	0.277	0.013	0	Proliferative B cells	C11orf83
0	0.308275	0.217	0	0	Proliferative B cells	RP11.132N15.3
0	0.322035	0.242	0.002	0	Proliferative B cells	SRSF10.1
0	0.325674	0.185	0.003	0	Proliferative B cells	RAPGEF5
0	0.333638	0.282	0.018	0	Proliferative B cells	PHGDH
0	0.335641	0.601	0.082	0	Proliferative B cells	MZB1
0	0.339169	0.326	0.023	0	Proliferative B cells	LCN2
0	0.339686	0.205	0.003	0	Proliferative B cells	MME
0	0.346041	0.223	0.009	0	Proliferative B cells	SPINK2
0	0.348407	0.314	0.019	0	Proliferative B cells	RFC3
0	0.35174	0.277	0.009	0	Proliferative B cells	RP11.1070N10.3
0	0.353852	0.279	0.011	0	Proliferative B cells	LINC00877
0	0.359161	0.301	0.015	0	Proliferative B cells	CDCA5
0	0.362246	0.337	0.029	0	Proliferative B cells	ACN9
0	0.36606	0.301	0.007	0	Proliferative B cells	PBK
0	0.368734	0.276	0.01	0	Proliferative B cells	CR2
0	0.371262	0.29	0.015	0	Proliferative B cells	CASC5
0	0.381248	0.628	0.045	0	Proliferative B cells	IGJ
0	0.381277	0.317	0.017	0	Proliferative B cells	MIR142
0	0.383478	0.245	0.001	0	Proliferative B cells	HTR3A
0	0.383769	0.306	0.011	0	Proliferative B cells	IER3IP1.1
0	0.394106	0.338	0.026	0	Proliferative B cells	MGP
0	0.397656	0.46	0.061	0	Proliferative B cells	VRK1
0	0.403134	0.305	0.024	0	Proliferative B cells	USP6NL
0	0.403983	0.338	0.024	0	Proliferative B cells	MCM2
0	0.404012	0.327	0.013	0	Proliferative B cells	SGOL1
0	0.404482	0.265	0.016	0	Proliferative B cells	SLC2A5
0	0.406009	0.312	0.016	0	Proliferative B cells	CDCA8
0	0.408343	0.258	0.014	0	Proliferative B cells	SPRED2
0	0.414503	0.335	0.016	0	Proliferative B cells	MTERFD2
0	0.416732	0.313	0.015	0	Proliferative B cells	MAP3K7CL
0	0.420879	0.321	0.024	0	Proliferative B cells	RP11.620J15.3
0	0.422405	0.213	0.003	0	Proliferative B cells	RP11.164H13.1
0	0.42871	0.326	0.017	0	Proliferative B cells	E2F5
0	0.431094	0.353	0.023	0	Proliferative B cells	PNOC
0	0.43186	0.323	0.015	0	Proliferative B cells	NUGGC
0	0.437003	0.373	0.032	0	Proliferative B cells	WDR76
0	0.437325	0.392	0.033	0	Proliferative B cells	C7orf55.LUC7L2
0	0.44314	0.306	0.01	0	Proliferative B cells	BFSP2
0	0.444234	0.341	0.016	0	Proliferative B cells	GTSE1
0	0.446948	0.354	0.021	0	Proliferative B cells	EBF1
0	0.448557	0.391	0.022	0	Proliferative B cells	ORC6
0	0.44949	0.415	0.031	0	Proliferative B cells	CENPH
0	0.449857	0.337	0.021	0	Proliferative B cells	ARHGAP11B
0	0.454339	0.305	0.008	0	Proliferative B cells	ASB13
0	0.45916	0.403	0.041	0	Proliferative B cells	FANCA
0	0.459912	0.398	0.031	0	Proliferative B cells	LYL1
0	0.461351	0.318	0.004	0	Proliferative B cells	UCHL1
0	0.461842	0.445	0.049	0	Proliferative B cells	TSPAN13
0	0.465525	0.405	0.033	0	Proliferative B cells	C11orf48
0	0.471282	0.211	0.006	0	Proliferative B cells	ELL3
0	0.474688	0.355	0.026	0	Proliferative B cells	CLSPN
0	0.47555	0.416	0.041	0	Proliferative B cells	UBE2T
0	0.475685	0.345	0.016	0	Proliferative B cells	NUF2
0	0.476179	0.285	0.014	0	Proliferative B cells	DHRS9
0	0.477075	0.393	0.022	0	Proliferative B cells	RP11.220I1.1
0	0.478493	0.356	0.017	0	Proliferative B cells	KIFC1
0	0.485078	0.363	0.016	0	Proliferative B cells	MMP7
0	0.485523	0.388	0.028	0	Proliferative B cells	CHI3L2
0	0.488055	0.422	0.038	0	Proliferative B cells	MRP63
0	0.488195	0.365	0.021	0	Proliferative B cells	TLR10
0	0.489751	0.356	0.006	0	Proliferative B cells	MEF2BNB.MEF2B
0	0.490887	0.289	0.014	0	Proliferative B cells	HMMR
0	0.491263	0.347	0.011	0	Proliferative B cells	SPC25
0	0.493428	0.416	0.031	0	Proliferative B cells	BPNT1
0	0.494787	0.396	0.028	0	Proliferative B cells	TNFRSF17
0	0.498664	0.411	0.038	0	Proliferative B cells	BRI3BP
0	0.504632	0.398	0.036	0	Proliferative B cells	HMGB3
0	0.512735	0.442	0.049	0	Proliferative B cells	TMED8
0	0.513163	0.348	0.014	0	Proliferative B cells	SH2B2
0	0.513254	0.392	0.01	0	Proliferative B cells	MND1
0	0.514061	0.464	0.062	0	Proliferative B cells	SMC2
0	0.519267	0.513	0.071	0	Proliferative B cells	EZH2
0	0.521155	0.263	0.004	0	Proliferative B cells	ZNF608
0	0.522622	0.488	0.061	0	Proliferative B cells	BTK
0	0.528923	0.434	0.045	0	Proliferative B cells	SSBP2
0	0.534963	0.388	0.034	0	Proliferative B cells	KIAA0226L
0	0.535386	0.442	0.033	0	Proliferative B cells	TERF2
0	0.535535	0.354	0.016	0	Proliferative B cells	CDT1
0	0.541489	0.436	0.023	0	Proliferative B cells	CENPU
0	0.541564	0.422	0.035	0	Proliferative B cells	CENPW
0	0.542843	0.518	0.078	0	Proliferative B cells	PXK
0	0.543004	0.263	0.013	0	Proliferative B cells	PLK1
0	0.548689	0.468	0.054	0	Proliferative B cells	BANK1
0	0.549208	0.418	0.019	0	Proliferative B cells	SETD5.AS1
0	0.557597	0.507	0.072	0	Proliferative B cells	TFDP1
0	0.557715	0.41	0.023	0	Proliferative B cells	ASF1B
0	0.559549	0.59	0.102	0	Proliferative B cells	ACADM
0	0.560375	0.508	0.064	0	Proliferative B cells	CLIC4
0	0.562067	0.376	0.039	0	Proliferative B cells	MYO1E
0	0.563968	0.386	0.02	0	Proliferative B cells	CCNA2
0	0.564309	0.41	0.034	0	Proliferative B cells	HHEX
0	0.565211	0.337	0.004	0	Proliferative B cells	DTX1
0	0.565861	0.386	0.013	0	Proliferative B cells	CDCA3
0	0.568846	0.493	0.058	0	Proliferative B cells	PDLIM1
0	0.570708	0.614	0.114	0	Proliferative B cells	SUSD3
0	0.574866	0.367	0.013	0	Proliferative B cells	CTRB2
0	0.579129	0.421	0.013	0	Proliferative B cells	RMI2
0	0.582334	0.454	0.028	0	Proliferative B cells	CDCA7L
0	0.594815	0.428	0.047	0	Proliferative B cells	FEN1
0	0.597659	0.583	0.106	0	Proliferative B cells	PLIN3
0	0.598215	0.588	0.083	0	Proliferative B cells	TCF4
0	0.600538	0.577	0.088	0	Proliferative B cells	SMIM20
0	0.60601	0.458	0.057	0	Proliferative B cells	SCIMP
0	0.619149	0.698	0.149	0	Proliferative B cells	CCDC69
0	0.620325	0.38	0.01	0	Proliferative B cells	CTA.250D10.23
0	0.624465	0.45	0.05	0	Proliferative B cells	QRSL1
0	0.627625	0.535	0.046	0	Proliferative B cells	STRBP
0	0.630019	0.438	0.02	0	Proliferative B cells	TMBIM4.1
0	0.630288	0.42	0.045	0	Proliferative B cells	CD72
0	0.632226	0.372	0.011	0	Proliferative B cells	CTD.2369P2.2
0	0.634666	0.402	0.014	0	Proliferative B cells	SHCBP1
0	0.635196	0.508	0.044	0	Proliferative B cells	MAD2L1
0	0.643408	0.493	0.024	0	Proliferative B cells	STAP1
0	0.644985	0.572	0.072	0	Proliferative B cells	PRPSAP2
0	0.651003	0.476	0.032	0	Proliferative B cells	BCL11A
0	0.654205	0.447	0.011	0	Proliferative B cells	NDUFA7.1
0	0.654979	0.613	0.103	0	Proliferative B cells	CD38
0	0.656399	0.391	0.026	0	Proliferative B cells	TPX2
0	0.657713	0.562	0.077	0	Proliferative B cells	PLCG2
0	0.659296	0.391	0.021	0	Proliferative B cells	GINS2
0	0.660694	0.459	0.027	0	Proliferative B cells	ZWINT
0	0.661651	0.561	0.082	0	Proliferative B cells	SNRNP25
0	0.664709	0.374	0.018	0	Proliferative B cells	HIST1H1B
0	0.666044	0.542	0.032	0	Proliferative B cells	VNN2
0	0.676684	0.585	0.067	0	Proliferative B cells	HVCN1
0	0.67743	0.626	0.097	0	Proliferative B cells	ZCCHC7
0	0.687599	0.536	0.044	0	Proliferative B cells	RASGRP3
0	0.692148	0.502	0.037	0	Proliferative B cells	CD180
0	0.692898	0.571	0.056	0	Proliferative B cells	LYPLAL1
0	0.704891	0.546	0.035	0	Proliferative B cells	RRAS2
0	0.705134	0.55	0.054	0	Proliferative B cells	SPATS2
0	0.712517	0.484	0.006	0	Proliferative B cells	AC023590.1
0	0.718429	0.435	0.02	0	Proliferative B cells	REG1A
0	0.721786	0.436	0.025	0	Proliferative B cells	LMO2
0	0.730545	0.493	0.034	0	Proliferative B cells	CPNE5
0	0.739944	0.388	0.024	0	Proliferative B cells	CCNB1
0	0.74392	0.568	0.045	0	Proliferative B cells	OGG1
0	0.746252	0.635	0.085	0	Proliferative B cells	LY86
0	0.768134	0.665	0.122	0	Proliferative B cells	GRHPR
0	0.77351	0.578	0.036	0	Proliferative B cells	BLK
0	0.775047	0.541	0.063	0	Proliferative B cells	IGFBP7
0	0.78697	0.435	0.042	0	Proliferative B cells	CENPF
0	0.788724	0.776	0.174	0	Proliferative B cells	RFTN1
0	0.791349	0.444	0.016	0	Proliferative B cells	PAX5
0	0.794345	0.454	0.005	0	Proliferative B cells	WDR66
0	0.79438	0.504	0.035	0	Proliferative B cells	DHFR
0	0.80254	0.345	0.016	0	Proliferative B cells	CDC20
0	0.808472	0.746	0.125	0	Proliferative B cells	STX7
0	0.809784	0.481	0.019	0	Proliferative B cells	SNORA76
0	0.81478	0.5	0.076	0	Proliferative B cells	GMDS
0	0.816216	0.625	0.053	0	Proliferative B cells	BLNK
0	0.833117	0.469	0.026	0	Proliferative B cells	CDKN3
0	0.837396	0.695	0.117	0	Proliferative B cells	SEL1L3
0	0.840041	0.635	0.071	0	Proliferative B cells	DEF8
0	0.841797	0.409	0.017	0	Proliferative B cells	CCNB2
0	0.843663	0.665	0.1	0	Proliferative B cells	CYB561A3
0	0.843698	0.728	0.111	0	Proliferative B cells	LAT2
0	0.849886	0.542	0.034	0	Proliferative B cells	LSMD1
0	0.853998	0.765	0.169	0	Proliferative B cells	SMARCB1
0	0.85683	0.475	0.002	0	Proliferative B cells	AICDA
0	0.858667	0.38	0.001	0	Proliferative B cells	SUGCT
0	0.864049	0.647	0.118	0	Proliferative B cells	LPP
0	0.864078	0.504	0.041	0	Proliferative B cells	STAG3
0	0.871002	0.516	0.019	0	Proliferative B cells	NDUFB8.1
0	0.87448	0.534	0.004	0	Proliferative B cells	ACY3
0	0.875444	0.882	0.231	0	Proliferative B cells	HLA.DQA1
0	0.8758	0.556	0.016	0	Proliferative B cells	MYBL2
0	0.884266	0.799	0.175	0	Proliferative B cells	GGA2
0	0.884716	0.408	0.001	0	Proliferative B cells	SERPINA9
0	0.888632	0.574	0.083	0	Proliferative B cells	CKS1B
0	0.893465	0.452	0.029	0	Proliferative B cells	CDK1
0	0.900529	0.488	0.036	0	Proliferative B cells	TYMS
0	0.901733	0.579	0.054	0	Proliferative B cells	CENPM
0	0.90233	0.475	0.015	0	Proliferative B cells	AC079767.4
0	0.904448	0.57	0.02	0	Proliferative B cells	GCSAM
0	0.906222	0.462	0.03	0	Proliferative B cells	TOP2A
0	0.909867	0.783	0.143	0	Proliferative B cells	POU2F2
0	0.912873	0.781	0.226	0	Proliferative B cells	SRSF9
0	0.927453	0.65	0.036	0	Proliferative B cells	SPIB
0	0.928746	0.791	0.137	0	Proliferative B cells	MBD4
0	0.935495	0.927	0.29	0	Proliferative B cells	HLA.DMA
0	0.937284	0.626	0.058	0	Proliferative B cells	DAAM1
0	0.943186	0.632	0.034	0	Proliferative B cells	HLA.DOB
0	0.944983	0.447	0.023	0	Proliferative B cells	RRM2
0	0.950723	0.505	0.022	0	Proliferative B cells	BIRC5
0	0.950764	0.572	0.014	0	Proliferative B cells	BCL7A
0	0.954286	0.475	0.016	0	Proliferative B cells	AURKB
0	0.961114	0.559	0.053	0	Proliferative B cells	NUSAP1
0	0.966778	0.554	0.032	0	Proliferative B cells	COX6A1P2
0	0.967152	0.596	0.032	0	Proliferative B cells	P2RX5
0	0.973249	0.79	0.17	0	Proliferative B cells	SYPL1
0	0.985928	0.526	0.031	0	Proliferative B cells	MKI67
0	1.00504	0.778	0.104	0	Proliferative B cells	TPD52
0	1.00889	0.62	0.041	0	Proliferative B cells	SF3B14
0	1.01764	0.795	0.134	0	Proliferative B cells	NCF1
0	1.02334	0.604	0.034	0	Proliferative B cells	BIK
0	1.03386	0.629	0.045	0	Proliferative B cells	CDCA7
0	1.03619	0.685	0.098	0	Proliferative B cells	U2AF1
0	1.04029	0.746	0.084	0	Proliferative B cells	SWAP70
0	1.04719	0.502	0.029	0	Proliferative B cells	TK1
0	1.05299	0.729	0.074	0	Proliferative B cells	CD40
0	1.05458	0.657	0.099	0	Proliferative B cells	HLA.DQA2
0	1.07094	0.614	0.032	0	Proliferative B cells	SNX29P2
0	1.09932	0.935	0.354	0	Proliferative B cells	HLA.DRA
0	1.11364	0.844	0.203	0	Proliferative B cells	UBE2J1
0	1.11406	0.783	0.08	0	Proliferative B cells	BCAS4
0	1.11578	0.58	0.027	0	Proliferative B cells	UQCR11.1
0	1.12803	0.725	0.191	0	Proliferative B cells	RPSAP58
0	1.12951	0.892	0.16	0	Proliferative B cells	HLA.DMB
0	1.13447	0.939	0.467	0	Proliferative B cells	SLC25A5
0	1.14661	0.918	0.24	0	Proliferative B cells	PARP1
0	1.16182	0.754	0.04	0	Proliferative B cells	CD19
0	1.18523	0.723	0.141	0	Proliferative B cells	PTTG1
0	1.2083	0.705	0.085	0	Proliferative B cells	HMCES
0	1.2084	0.748	0.057	0	Proliferative B cells	EAF2
0	1.21543	0.468	0.024	0	Proliferative B cells	UBE2C
0	1.21868	0.688	0.019	0	Proliferative B cells	NEIL1
0	1.24779	0.881	0.12	0	Proliferative B cells	MEF2C
0	1.26281	0.857	0.11	0	Proliferative B cells	IRF8
0	1.28803	0.826	0.06	0	Proliferative B cells	POU2AF1
0	1.32329	0.869	0.212	0	Proliferative B cells	HMGA1
0	1.33688	0.597	0.019	0	Proliferative B cells	PSMA2.1
0	1.34413	0.783	0.032	0	Proliferative B cells	FCRLA
0	1.38278	0.813	0.081	0	Proliferative B cells	BASP1
0	1.40403	0.976	0.51	0	Proliferative B cells	HMGN1
0	1.4419	0.848	0.103	0	Proliferative B cells	LRMP
0	1.44932	0.704	0.049	0	Proliferative B cells	IGLL5
0	1.4728	0.802	0.028	0	Proliferative B cells	CD22
0	1.54632	0.679	0.01	0	Proliferative B cells	RGS13
0	1.5968	0.661	0.028	0	Proliferative B cells	KIAA0101
0	1.70537	0.928	0.462	0	Proliferative B cells	HMGN2
0	1.77204	0.788	0.031	0	Proliferative B cells	VPREB3
0	1.78037	0.833	0.141	0	Proliferative B cells	MARCKSL1
0	1.84171	0.83	0.102	0	Proliferative B cells	SMIM14
0	1.84764	0.789	0.173	0	Proliferative B cells	STMN1
0	1.99352	0.98	0.117	0	Proliferative B cells	CD79A
0	1.99816	0.968	0.082	0	Proliferative B cells	MS4A1
0	2.07314	0.958	0.104	0	Proliferative B cells	CD79B
0	2.27532	0.845	0.018	0	Proliferative B cells	TCL1A
5.80234e-308	0.343849	0.336	0.031	5.08627e-303	Proliferative B cells	WEE1
1.17191e-307	0.278106	0.278	0.021	1.02728e-302	Proliferative B cells	PXMP2
2.06685e-307	0.292254	0.175	0.004	1.81178e-302	Proliferative B cells	TUBB2B
2.41337e-306	0.475405	0.505	0.079	2.11553e-301	Proliferative B cells	HAUS1
2.7516e-306	0.307737	0.248	0.013	2.41202e-301	Proliferative B cells	C16orf80
3.06144e-306	0.454465	0.435	0.048	2.68362e-301	Proliferative B cells	C1orf63
4.50247e-306	0.458269	0.403	0.045	3.94682e-301	Proliferative B cells	NEK6
7.07777e-306	0.545479	0.5	0.075	6.2043e-301	Proliferative B cells	ANKRD13A
5.20884e-305	0.597135	0.577	0.104	4.56602e-300	Proliferative B cells	MRPL23
6.78644e-305	0.268494	0.221	0.009	5.94893e-300	Proliferative B cells	AL592183.1
3.58911e-304	0.773044	0.598	0.11	3.14618e-299	Proliferative B cells	FAM3C
8.81438e-302	0.280837	0.211	0.006	7.7266e-297	Proliferative B cells	HIST1H3B
2.49258e-301	0.555115	0.526	0.087	2.18497e-296	Proliferative B cells	SMARCA4
1.47354e-300	0.730292	0.716	0.176	1.29169e-295	Proliferative B cells	DCK
1.2264e-299	0.4491	0.29	0.019	1.07505e-294	Proliferative B cells	ASPM
8.38795e-299	0.998238	0.812	0.257	7.35279e-294	Proliferative B cells	POLD4
2.60434e-298	0.409108	0.254	0.012	2.28294e-293	Proliferative B cells	CENPA
9.37727e-298	0.254481	0.229	0.01	8.22002e-293	Proliferative B cells	CDC45
1.1704e-297	0.550225	0.594	0.113	1.02596e-292	Proliferative B cells	UBE2E1
1.79767e-296	0.323041	0.247	0.014	1.57582e-291	Proliferative B cells	RP11.16E12.2
2.14627e-296	0.381642	0.314	0.024	1.8814e-291	Proliferative B cells	PRC1
2.06108e-293	1.76882	0.86	0.349	1.80672e-288	Proliferative B cells	HMGB2
2.62808e-293	0.253595	0.212	0.008	2.30375e-288	Proliferative B cells	PRSS1
2.87047e-293	0.296173	0.341	0.032	2.51622e-288	Proliferative B cells	MYBL1
3.32162e-293	0.485158	0.465	0.066	2.9117e-288	Proliferative B cells	AIM2
4.45263e-293	0.4234	0.245	0.015	3.90313e-288	Proliferative B cells	FCRL1
8.67088e-293	0.611347	0.549	0.095	7.6008e-288	Proliferative B cells	SYK
1.03117e-292	0.756887	0.811	0.234	9.03914e-288	Proliferative B cells	HNRNPD
2.59793e-292	0.352013	0.331	0.033	2.27732e-287	Proliferative B cells	WDR34
5.70727e-292	0.447851	0.374	0.043	5.00293e-287	Proliferative B cells	HELLS
5.28193e-291	0.272281	0.255	0.016	4.63008e-286	Proliferative B cells	NCAPG
9.91179e-291	0.261546	0.24	0.011	8.68858e-286	Proliferative B cells	HJURP
2.06689e-290	0.708756	0.741	0.182	1.81182e-285	Proliferative B cells	HDAC1
4.26795e-289	0.254847	0.233	0.012	3.74124e-284	Proliferative B cells	SPARCL1
3.88167e-288	0.425365	0.435	0.06	3.40264e-283	Proliferative B cells	C19orf48
6.36464e-288	0.886517	0.724	0.193	5.57918e-283	Proliferative B cells	METAP2
1.69284e-286	0.836681	0.812	0.26	1.48393e-281	Proliferative B cells	SNRPD1
3.32649e-286	0.406905	0.418	0.057	2.91596e-281	Proliferative B cells	BCL2L12
4.17363e-286	0.602076	0.621	0.124	3.65856e-281	Proliferative B cells	MTF2
7.28019e-286	0.652341	0.511	0.083	6.38174e-281	Proliferative B cells	KIAA0922
2.20908e-285	1.00771	0.998	0.842	1.93646e-280	Proliferative B cells	ACTG1
3.62603e-285	0.29237	0.245	0.013	3.17855e-280	Proliferative B cells	CKAP2L
5.92387e-285	0.882961	0.88	0.315	5.1928e-280	Proliferative B cells	TCEA1
1.91512e-284	0.848984	0.703	0.181	1.67878e-279	Proliferative B cells	RPA3
2.89145e-283	0.293745	0.275	0.019	2.53462e-278	Proliferative B cells	RAD51AP1
5.05917e-283	0.283188	0.233	0.012	4.43482e-278	Proliferative B cells	PDGFD
2.05673e-282	0.555137	0.558	0.095	1.80291e-277	Proliferative B cells	PLEKHF2
1.72572e-281	0.382317	0.331	0.033	1.51275e-276	Proliferative B cells	FADS3
7.55512e-281	0.31804	0.323	0.03	6.62275e-276	Proliferative B cells	GSTZ1
2.21254e-280	0.462034	0.299	0.026	1.93949e-275	Proliferative B cells	SPINK1
2.51563e-280	0.500291	0.719	0.162	2.20518e-275	Proliferative B cells	CD81
7.08106e-280	0.493336	0.335	0.034	6.20719e-275	Proliferative B cells	CXCR5
2.76033e-279	0.294319	0.231	0.011	2.41968e-274	Proliferative B cells	DLGAP5
2.69645e-278	1.04406	0.977	0.606	2.36368e-273	Proliferative B cells	CORO1A
1.02402e-277	0.537793	0.48	0.08	8.97642e-273	Proliferative B cells	IFT57
7.58326e-277	0.47762	0.399	0.052	6.64741e-272	Proliferative B cells	GMNN
8.52234e-277	0.699193	0.773	0.197	7.4706e-272	Proliferative B cells	CTSH
9.74322e-277	0.628619	0.782	0.22	8.54081e-272	Proliferative B cells	DBNL
1.66572e-276	0.745686	0.504	0.086	1.46015e-271	Proliferative B cells	MCM7
1.00594e-275	1.47805	0.959	0.649	8.81798e-271	Proliferative B cells	HMGB1
1.80066e-275	0.481142	0.598	0.123	1.57844e-270	Proliferative B cells	SKAP2
6.31617e-275	0.525347	0.561	0.107	5.53669e-270	Proliferative B cells	CBX5
3.79814e-274	0.322498	0.239	0.013	3.32942e-269	Proliferative B cells	TROAP
6.15384e-274	0.408678	0.294	0.025	5.3944e-269	Proliferative B cells	AFF3
3.31197e-273	0.257114	0.228	0.014	2.90324e-268	Proliferative B cells	GNG11
5.78613e-273	0.832832	0.772	0.247	5.07207e-268	Proliferative B cells	SNRPE
3.18579e-272	0.58809	0.53	0.089	2.79263e-267	Proliferative B cells	MAP4K4
1.30634e-271	1.07792	0.968	0.65	1.14512e-266	Proliferative B cells	ATP5L
9.71885e-271	0.401607	0.631	0.123	8.51945e-266	Proliferative B cells	SPI1
1.80777e-270	0.961305	0.938	0.377	1.58467e-265	Proliferative B cells	UCP2
2.35785e-270	0.285146	0.271	0.021	2.06687e-265	Proliferative B cells	CHEK1
4.40733e-270	0.502729	0.447	0.065	3.86342e-265	Proliferative B cells	BCL6
2.34157e-269	0.667884	0.694	0.178	2.0526e-264	Proliferative B cells	RBBP7
2.47095e-269	0.961939	0.912	0.415	2.16601e-264	Proliferative B cells	ANP32B
8.17327e-268	0.601368	0.627	0.147	7.16461e-263	Proliferative B cells	IMP4
1.29793e-266	0.40301	0.468	0.069	1.13775e-261	Proliferative B cells	SNORD3A
1.81924e-266	0.322325	0.368	0.043	1.59472e-261	Proliferative B cells	CCDC23
2.08884e-266	0.294666	0.21	0.011	1.83106e-261	Proliferative B cells	FAM111B
1.69492e-264	0.592215	0.621	0.131	1.48575e-259	Proliferative B cells	GCHFR
1.86574e-264	0.567341	0.562	0.112	1.63549e-259	Proliferative B cells	ORAI2
4.13753e-264	0.379726	0.4	0.053	3.62692e-259	Proliferative B cells	FAM76B
5.80133e-263	0.403253	0.285	0.023	5.08539e-258	Proliferative B cells	CENPE
1.0669e-262	0.420114	0.423	0.061	9.35238e-258	Proliferative B cells	RFC2
3.02565e-262	0.454669	0.567	0.11	2.65226e-257	Proliferative B cells	LYN
2.11969e-261	0.534548	0.481	0.082	1.8581e-256	Proliferative B cells	NME1
2.13686e-261	0.252656	0.254	0.02	1.87315e-256	Proliferative B cells	BRCA1
1.3842e-259	0.740394	0.641	0.149	1.21338e-254	Proliferative B cells	SMC4
8.72672e-259	0.357634	0.26	0.019	7.64976e-254	Proliferative B cells	PTK2
1.21611e-258	0.848648	0.512	0.09	1.06603e-253	Proliferative B cells	KLHL6
1.7806e-258	0.969983	0.519	0.106	1.56085e-253	Proliferative B cells	PCNA
6.59153e-258	1.35337	0.861	0.467	5.77807e-253	Proliferative B cells	H3F3A
3.01323e-257	0.591797	0.536	0.101	2.64137e-252	Proliferative B cells	MCM5
5.48151e-256	0.581535	0.653	0.161	4.80504e-251	Proliferative B cells	ODC1
4.38823e-255	0.421804	0.391	0.057	3.84668e-250	Proliferative B cells	AMFR
9.32756e-254	0.353753	0.308	0.03	8.17644e-249	Proliferative B cells	MXD3
1.85406e-253	0.7384	0.653	0.161	1.62525e-248	Proliferative B cells	DNMT1
1.91428e-253	0.47348	0.538	0.106	1.67804e-248	Proliferative B cells	SKA2
2.20558e-253	0.32363	0.276	0.024	1.93339e-248	Proliferative B cells	MTA3
2.21479e-252	0.33179	0.371	0.047	1.94146e-247	Proliferative B cells	RPL39L
3.35265e-252	0.602136	0.679	0.167	2.9389e-247	Proliferative B cells	LYPLA1
2.04508e-251	0.55449	0.472	0.083	1.7927e-246	Proliferative B cells	MCM3
6.65779e-251	0.536701	0.526	0.094	5.83615e-246	Proliferative B cells	LMNB1
6.92836e-251	0.557197	0.564	0.112	6.07333e-246	Proliferative B cells	PTPN18
1.08309e-250	0.852141	0.977	0.642	9.49426e-246	Proliferative B cells	ARPC3
2.85359e-250	1.01569	0.971	0.72	2.50143e-245	Proliferative B cells	HNRNPA1
7.85999e-250	0.702701	0.499	0.098	6.88999e-245	Proliferative B cells	EIF1AY
4.12461e-249	0.520179	0.603	0.135	3.61559e-244	Proliferative B cells	FKBP3
1.19532e-246	0.873179	0.981	0.703	1.04781e-241	Proliferative B cells	ARPC2
3.10468e-246	0.333189	0.263	0.019	2.72153e-241	Proliferative B cells	SGOL2
5.46505e-246	0.367895	0.254	0.021	4.79061e-241	Proliferative B cells	GPR160
5.58227e-246	0.532653	0.628	0.144	4.89336e-241	Proliferative B cells	RFC1
2.03063e-243	0.423712	0.487	0.084	1.78003e-238	Proliferative B cells	HNRNPA1L2
5.79825e-243	0.715806	0.928	0.386	5.08268e-238	Proliferative B cells	HLA.DPA1
7.76573e-243	0.735602	0.809	0.276	6.80736e-238	Proliferative B cells	NUCKS1
1.9877e-242	0.259227	0.251	0.021	1.7424e-237	Proliferative B cells	C6orf211
8.66842e-242	0.369306	0.354	0.046	7.59865e-237	Proliferative B cells	GPR18
2.02957e-241	0.418609	0.355	0.045	1.7791e-236	Proliferative B cells	DOK3
5.64594e-241	0.279259	0.299	0.03	4.94918e-236	Proliferative B cells	HAUS8
1.4409e-240	0.290018	0.327	0.036	1.26308e-235	Proliferative B cells	CENPN
4.52884e-240	0.417188	0.27	0.023	3.96994e-235	Proliferative B cells	AURKA
1.22509e-239	0.358411	0.481	0.085	1.0739e-234	Proliferative B cells	PMF1
1.50856e-239	0.404527	0.424	0.068	1.32239e-234	Proliferative B cells	PRKD3
3.91393e-239	0.53182	0.602	0.141	3.43091e-234	Proliferative B cells	GLRX3
8.83524e-239	0.941589	0.709	0.208	7.74488e-234	Proliferative B cells	EIF4A1
2.25206e-238	0.303037	0.329	0.035	1.97414e-233	Proliferative B cells	SLMO2
5.94103e-238	0.394536	0.374	0.055	5.20785e-233	Proliferative B cells	SNX8
2.34307e-237	0.668089	0.755	0.224	2.05391e-232	Proliferative B cells	NAA38
1.40087e-236	0.601639	0.667	0.162	1.22799e-231	Proliferative B cells	NHP2L1
1.59806e-235	0.561666	0.616	0.15	1.40084e-230	Proliferative B cells	TAF9
1.78027e-235	0.425104	0.345	0.044	1.56056e-230	Proliferative B cells	TCF3
1.16834e-233	0.355427	0.337	0.042	1.02415e-228	Proliferative B cells	PKIG
1.97759e-233	0.369913	0.392	0.057	1.73353e-228	Proliferative B cells	RNASEH2A
2.52919e-233	0.396007	0.46	0.082	2.21706e-228	Proliferative B cells	RP11.347P5.1
2.76182e-233	0.437853	0.57	0.127	2.42098e-228	Proliferative B cells	QARS
1.04574e-232	0.426497	0.428	0.069	9.16684e-228	Proliferative B cells	RP11.345J4.5
1.34907e-231	0.430127	0.483	0.092	1.18258e-226	Proliferative B cells	CCDC88A
5.41958e-231	0.557329	0.719	0.197	4.75075e-226	Proliferative B cells	ZFAND6
2.68189e-230	0.368467	0.251	0.022	2.35092e-225	Proliferative B cells	FAM129C
6.52426e-230	0.268112	0.293	0.031	5.7191e-225	Proliferative B cells	SPARC
7.6752e-230	0.281434	0.381	0.059	6.728e-225	Proliferative B cells	EMG1
1.27184e-229	0.602371	0.782	0.254	1.11488e-224	Proliferative B cells	RBBP4
9.82153e-229	0.8363	0.836	0.329	8.60945e-224	Proliferative B cells	PRDX6
6.7265e-228	0.899143	0.905	0.428	5.89638e-223	Proliferative B cells	DBI
3.28394e-226	0.322759	0.374	0.055	2.87867e-221	Proliferative B cells	EEF1E1
9.37674e-226	0.464561	0.646	0.162	8.21955e-221	Proliferative B cells	NDUFC2
2.58314e-225	0.389357	0.504	0.099	2.26436e-220	Proliferative B cells	ANAPC15
3.11813e-225	0.802282	0.776	0.271	2.73332e-220	Proliferative B cells	MRPL51
3.38485e-225	0.586671	0.634	0.161	2.96712e-220	Proliferative B cells	CARHSP1
3.6115e-225	0.608009	0.671	0.179	3.16581e-220	Proliferative B cells	PSIP1
4.21038e-225	0.714939	0.724	0.226	3.69078e-220	Proliferative B cells	DDX39A
2.93443e-224	0.316344	0.372	0.056	2.5723e-219	Proliferative B cells	GLRX5
1.19195e-223	0.451119	0.382	0.057	1.04485e-218	Proliferative B cells	BACH2
1.60411e-223	0.405513	0.526	0.106	1.40615e-218	Proliferative B cells	MRPS14
7.79449e-223	0.337957	0.353	0.048	6.83257e-218	Proliferative B cells	RFC4
1.59575e-222	0.492974	0.474	0.091	1.39882e-217	Proliferative B cells	ZNF581
6.37987e-222	0.303334	0.228	0.017	5.59253e-217	Proliferative B cells	FAM105B
8.05938e-222	0.486632	0.477	0.093	7.06477e-217	Proliferative B cells	TACC3
7.98923e-221	0.309716	0.265	0.026	7.00328e-216	Proliferative B cells	MILR1
2.03401e-220	0.51175	0.734	0.221	1.78299e-215	Proliferative B cells	POLR2G
2.44226e-220	0.454821	0.492	0.093	2.14086e-215	Proliferative B cells	DAPP1
2.56006e-219	0.335738	0.372	0.055	2.24412e-214	Proliferative B cells	KLHL5
8.42142e-219	0.373209	0.355	0.054	7.38213e-214	Proliferative B cells	CXXC5
3.87109e-218	0.469984	0.574	0.132	3.39336e-213	Proliferative B cells	MTMR14
5.52485e-218	0.383258	0.423	0.074	4.84303e-213	Proliferative B cells	RRM1
6.04229e-218	0.442746	0.305	0.037	5.29661e-213	Proliferative B cells	WDFY4
9.85585e-218	0.418914	0.386	0.062	8.63954e-213	Proliferative B cells	SEMA4A
7.96529e-217	0.352574	0.339	0.049	6.98229e-212	Proliferative B cells	UBE2E2
9.18328e-217	0.414433	0.466	0.091	8.04997e-212	Proliferative B cells	MRPL15
3.35762e-216	0.305989	0.365	0.054	2.94325e-211	Proliferative B cells	ITGB3BP
7.39713e-216	0.485821	0.616	0.154	6.48425e-211	Proliferative B cells	CCDC167
1.12971e-215	0.660347	0.806	0.279	9.90295e-211	Proliferative B cells	ATP5O
1.68312e-215	0.551391	0.763	0.227	1.47541e-210	Proliferative B cells	ITSN2
2.11901e-215	0.450463	0.277	0.033	1.8575e-210	Proliferative B cells	SNX22
2.29121e-215	0.378619	0.293	0.034	2.00845e-210	Proliferative B cells	MCM4
5.22477e-215	0.465537	0.4	0.067	4.57999e-210	Proliferative B cells	HLA.DOA
9.59588e-215	0.330091	0.412	0.074	8.41165e-210	Proliferative B cells	YEATS4
1.06951e-214	0.583147	0.699	0.208	9.37518e-210	Proliferative B cells	LSM6
2.03451e-214	0.932855	0.823	0.358	1.78343e-209	Proliferative B cells	H2AFV
3.07058e-214	0.348561	0.558	0.122	2.69164e-209	Proliferative B cells	ID3
7.65866e-214	0.350044	0.414	0.072	6.71351e-209	Proliferative B cells	DTYMK
5.13775e-213	1.36458	0.832	0.398	4.5037e-208	Proliferative B cells	TUBB
2.53876e-212	0.425455	0.43	0.078	2.22545e-207	Proliferative B cells	DCAF12
3.37865e-212	0.522342	0.423	0.07	2.96169e-207	Proliferative B cells	RNGTT
1.34434e-211	0.270082	0.277	0.031	1.17844e-206	Proliferative B cells	NDC1
4.00465e-210	0.376494	0.492	0.1	3.51043e-205	Proliferative B cells	COMMD4
4.31585e-210	0.397158	0.353	0.052	3.78323e-205	Proliferative B cells	RPRD1B
6.25423e-210	0.750261	0.831	0.364	5.4824e-205	Proliferative B cells	ERH
8.98251e-210	0.354276	0.439	0.083	7.87398e-205	Proliferative B cells	COX11
2.25255e-209	0.554859	0.663	0.181	1.97456e-204	Proliferative B cells	C12orf75
2.28208e-209	0.822327	0.938	0.468	2.00045e-204	Proliferative B cells	LIMD2
3.01288e-209	0.563244	0.633	0.173	2.64106e-204	Proliferative B cells	ANP32E
4.61996e-209	0.312104	0.379	0.063	4.04981e-204	Proliferative B cells	DERA
6.38731e-209	0.394277	0.524	0.118	5.59905e-204	Proliferative B cells	TMEM261
2.8094e-208	0.745648	0.986	0.827	2.46269e-203	Proliferative B cells	CFL1
4.11646e-208	1.12953	0.689	0.242	3.60845e-203	Proliferative B cells	DUT
7.61146e-208	0.430406	0.632	0.163	6.67213e-203	Proliferative B cells	ETFB
8.96857e-208	0.305797	0.405	0.07	7.86176e-203	Proliferative B cells	RMDN1
1.05998e-207	0.689586	0.819	0.32	9.29169e-203	Proliferative B cells	CBX3
1.93774e-207	0.342228	0.424	0.077	1.69861e-202	Proliferative B cells	RUVBL1
2.06692e-207	0.561178	0.725	0.21	1.81184e-202	Proliferative B cells	C6orf48
2.18577e-207	0.386634	0.51	0.109	1.91602e-202	Proliferative B cells	NUDT1
7.75432e-207	0.283522	0.317	0.044	6.79736e-202	Proliferative B cells	LIG1
4.98963e-206	0.683993	0.77	0.273	4.37386e-201	Proliferative B cells	PSMA4
6.44745e-206	1.34148	0.879	0.483	5.65177e-201	Proliferative B cells	H2AFZ
3.87309e-205	0.46798	0.592	0.143	3.39512e-200	Proliferative B cells	MCTS1
6.84573e-205	0.598804	0.92	0.379	6.0009e-200	Proliferative B cells	HLA.DPB1
1.03988e-204	0.553479	0.751	0.252	9.11547e-200	Proliferative B cells	MZT2B
1.27076e-204	0.265092	0.212	0.016	1.11393e-199	Proliferative B cells	GPR114
1.96229e-204	0.606697	0.687	0.205	1.72013e-199	Proliferative B cells	NASP
4.52842e-204	0.673681	0.924	0.461	3.96957e-199	Proliferative B cells	ACTR3
4.86021e-204	0.840999	1	0.824	4.26041e-199	Proliferative B cells	CD74
1.11795e-203	0.385495	0.541	0.124	9.79982e-199	Proliferative B cells	MRPL27
6.078e-203	0.257152	0.194	0.013	5.32791e-198	Proliferative B cells	GCNT2
2.05226e-202	0.653383	0.821	0.308	1.79899e-197	Proliferative B cells	LAMTOR5
6.02602e-202	0.319555	0.305	0.039	5.28235e-197	Proliferative B cells	HS2ST1
7.88804e-202	0.336585	0.426	0.081	6.91458e-197	Proliferative B cells	MYL6B
1.14298e-201	0.788832	0.99	0.818	1.00192e-196	Proliferative B cells	SERF2
2.99732e-201	0.650162	0.688	0.221	2.62742e-196	Proliferative B cells	LSM5
3.66064e-201	0.328449	0.345	0.049	3.20888e-196	Proliferative B cells	RP11.349A22.5
3.84648e-201	0.628124	0.423	0.079	3.37179e-196	Proliferative B cells	UBE2S
4.03236e-201	0.284595	0.387	0.063	3.53472e-196	Proliferative B cells	ELP6
1.66395e-200	0.424592	0.432	0.076	1.4586e-195	Proliferative B cells	TMEM156
4.75968e-200	0.702372	0.948	0.45	4.17229e-195	Proliferative B cells	HLA.DRB1
9.19618e-200	0.59601	0.821	0.306	8.06128e-195	Proliferative B cells	UBE2N
2.05406e-199	0.300877	0.327	0.048	1.80056e-194	Proliferative B cells	TFEB
2.66874e-199	0.848186	0.918	0.52	2.33939e-194	Proliferative B cells	RAN
3.00737e-199	0.656403	0.705	0.233	2.63623e-194	Proliferative B cells	LSM3
3.95681e-199	0.406616	0.5	0.108	3.4685e-194	Proliferative B cells	HSH2D
1.79831e-198	0.393252	0.463	0.095	1.57638e-193	Proliferative B cells	SIAH2
2.15228e-198	0.836227	0.977	0.705	1.88667e-193	Proliferative B cells	RPS20
4.01899e-198	0.414933	0.518	0.116	3.52301e-193	Proliferative B cells	DAZAP1
7.73914e-198	0.251606	0.236	0.024	6.78405e-193	Proliferative B cells	TIMELESS
1.04059e-197	0.85542	0.847	0.343	9.12174e-193	Proliferative B cells	PTPRCAP
1.07007e-197	0.328872	0.18	0.013	9.38017e-193	Proliferative B cells	FGD6
1.66613e-197	0.677201	0.841	0.361	1.46052e-192	Proliferative B cells	TBCA
1.72752e-197	0.608699	0.674	0.199	1.51432e-192	Proliferative B cells	LSM10
3.97625e-197	0.483397	0.62	0.168	3.48554e-192	Proliferative B cells	FDPS
1.43691e-196	0.530584	0.795	0.263	1.25958e-191	Proliferative B cells	ARPC4
1.89198e-196	0.345227	0.432	0.082	1.65849e-191	Proliferative B cells	KIF20B
3.121e-196	0.341596	0.318	0.043	2.73583e-191	Proliferative B cells	NCAPD2
3.69174e-196	0.286339	0.315	0.041	3.23614e-191	Proliferative B cells	RAB30.AS1
5.81829e-196	0.332106	0.354	0.06	5.10025e-191	Proliferative B cells	FAM208B
3.35059e-195	0.665429	0.932	0.466	2.9371e-190	Proliferative B cells	NAP1L1
5.03842e-195	0.33304	0.341	0.053	4.41662e-190	Proliferative B cells	MSH6
5.45396e-195	0.584865	0.862	0.361	4.78088e-190	Proliferative B cells	GDI2
3.1813e-194	0.279659	0.225	0.02	2.78869e-189	Proliferative B cells	COL3A1
5.94243e-193	0.533395	0.649	0.183	5.20907e-188	Proliferative B cells	LBR
2.27356e-192	0.382522	0.391	0.065	1.99298e-187	Proliferative B cells	TUBB2A
6.2361e-192	0.284836	0.372	0.065	5.4665e-187	Proliferative B cells	WDR77
6.679e-192	0.279753	0.33	0.045	5.85474e-187	Proliferative B cells	C20orf196
7.53105e-192	0.53886	0.649	0.195	6.60164e-187	Proliferative B cells	DDT
1.72973e-191	0.541048	0.679	0.212	1.51627e-186	Proliferative B cells	MPC2
1.96513e-191	0.359865	0.2	0.016	1.72261e-186	Proliferative B cells	CCDC144A
2.13805e-191	0.284939	0.318	0.046	1.87419e-186	Proliferative B cells	LRWD1
3.57094e-191	0.292305	0.212	0.019	3.13025e-186	Proliferative B cells	FCRL2
5.69059e-191	0.474623	0.657	0.185	4.98831e-186	Proliferative B cells	CCDC109B
1.29455e-190	0.747637	0.562	0.148	1.13479e-185	Proliferative B cells	KPNA2
1.80857e-190	0.34357	0.325	0.048	1.58537e-185	Proliferative B cells	CERS4
2.11225e-190	0.422252	0.481	0.1	1.85158e-185	Proliferative B cells	SCPEP1
9.38839e-190	0.624861	0.813	0.318	8.22977e-185	Proliferative B cells	SELT
3.90694e-189	0.300016	0.339	0.053	3.42478e-184	Proliferative B cells	MGME1
9.06681e-189	0.58879	0.775	0.285	7.94787e-184	Proliferative B cells	PPP1CC
1.38298e-188	0.782439	0.691	0.262	1.2123e-183	Proliferative B cells	RANBP1
4.61025e-188	0.709592	0.832	0.368	4.0413e-183	Proliferative B cells	ATP5J
4.99782e-188	0.647179	0.865	0.319	4.38104e-183	Proliferative B cells	HLA.DQB1
8.43871e-188	0.640959	0.841	0.351	7.39728e-183	Proliferative B cells	ATP5A1
1.35528e-187	0.328912	0.457	0.097	1.18802e-182	Proliferative B cells	RFXANK
1.94373e-187	0.571574	0.74	0.247	1.70385e-182	Proliferative B cells	TKT
2.20403e-187	0.361808	0.447	0.092	1.93203e-182	Proliferative B cells	ADA
4.84757e-187	0.439116	0.499	0.118	4.24933e-182	Proliferative B cells	DNAJC9
9.78885e-187	0.651874	0.885	0.424	8.58081e-182	Proliferative B cells	ATP5J2
2.84346e-186	0.676973	0.898	0.432	2.49255e-181	Proliferative B cells	ARPC5
3.9775e-186	0.363696	0.438	0.096	3.48664e-181	Proliferative B cells	HSD17B12
5.45023e-186	0.306748	0.447	0.096	4.77762e-181	Proliferative B cells	EXOSC3
7.70185e-186	0.47414	0.717	0.229	6.75136e-181	Proliferative B cells	CSK
9.36923e-185	0.443453	0.659	0.187	8.21297e-180	Proliferative B cells	SNX5
2.79859e-184	0.289516	0.386	0.073	2.45321e-179	Proliferative B cells	MRPL12
7.49472e-184	0.615582	0.89	0.39	6.56979e-179	Proliferative B cells	EIF3L
9.36869e-184	0.821586	0.99	0.881	8.2125e-179	Proliferative B cells	RPS2
4.57758e-183	0.281989	0.363	0.063	4.01266e-178	Proliferative B cells	MRPL39
2.12005e-182	0.344902	0.408	0.076	1.85841e-177	Proliferative B cells	CBWD1
1.0812e-181	0.250005	0.409	0.087	9.47769e-177	Proliferative B cells	OAZ2
3.60969e-181	0.333963	0.342	0.052	3.16422e-176	Proliferative B cells	WHSC1
4.81988e-181	0.489821	0.638	0.18	4.22506e-176	Proliferative B cells	RBM6
5.85917e-181	0.53166	0.537	0.131	5.13609e-176	Proliferative B cells	SYVN1
8.28323e-181	0.735062	1	0.956	7.26099e-176	Proliferative B cells	ACTB
1.04818e-180	0.563586	0.531	0.131	9.18828e-176	Proliferative B cells	IL4R
1.19365e-180	0.55009	0.734	0.26	1.04634e-175	Proliferative B cells	NDUFB3
3.47155e-180	0.367873	0.427	0.087	3.04313e-175	Proliferative B cells	LYRM4
3.75515e-180	0.293064	0.318	0.046	3.29173e-175	Proliferative B cells	C21orf33
3.96752e-180	1.01841	0.898	0.687	3.47789e-175	Proliferative B cells	RPL7
7.8463e-180	0.415058	0.53	0.139	6.87798e-175	Proliferative B cells	ZBTB8OS
1.50025e-179	0.331613	0.511	0.128	1.3151e-174	Proliferative B cells	MRPL13
3.47425e-179	0.286632	0.391	0.075	3.04549e-174	Proliferative B cells	CDCA4
9.65466e-179	0.519633	0.538	0.148	8.46318e-174	Proliferative B cells	NANS
1.42504e-178	0.918367	0.859	0.372	1.24918e-173	Proliferative B cells	LTB
1.58333e-178	0.438639	0.634	0.186	1.38793e-173	Proliferative B cells	SNAP23
3.35428e-178	0.282359	0.35	0.064	2.94033e-173	Proliferative B cells	TMA16
9.41121e-177	0.610187	0.815	0.326	8.24977e-172	Proliferative B cells	C14orf166
1.49883e-176	0.694033	0.638	0.21	1.31386e-171	Proliferative B cells	SLBP
1.6673e-176	0.667259	0.829	0.36	1.46154e-171	Proliferative B cells	ATPIF1
7.29531e-176	0.282363	0.347	0.059	6.39499e-171	Proliferative B cells	RAB4B
1.00748e-175	0.723415	0.912	0.451	8.83143e-171	Proliferative B cells	PRDX1
1.87185e-175	0.36074	0.243	0.028	1.64085e-170	Proliferative B cells	ZNF318
2.21074e-175	0.57199	0.99	0.886	1.93792e-170	Proliferative B cells	RPL15
1.94318e-174	0.342853	0.487	0.115	1.70337e-169	Proliferative B cells	TPRKB
2.19244e-174	0.312696	0.516	0.133	1.92187e-169	Proliferative B cells	BABAM1
8.58172e-174	0.539084	0.74	0.264	7.52265e-169	Proliferative B cells	H2AFY
9.95708e-174	0.733438	0.957	0.659	8.72827e-169	Proliferative B cells	NPM1
1.28171e-173	0.335344	0.314	0.049	1.12354e-168	Proliferative B cells	RALGPS2
1.73108e-173	0.53776	0.823	0.331	1.51745e-168	Proliferative B cells	SMDT1
1.76168e-173	0.518198	0.674	0.221	1.54427e-168	Proliferative B cells	PRDX3
3.6975e-173	0.767598	0.977	0.832	3.24119e-168	Proliferative B cells	RPL27A
4.03072e-173	0.344589	0.52	0.132	3.53329e-168	Proliferative B cells	MZT1
5.4337e-173	0.369304	0.442	0.097	4.76313e-168	Proliferative B cells	KIF22
2.6308e-172	0.3087	0.469	0.109	2.30613e-167	Proliferative B cells	TPGS2
4.25857e-172	0.536346	0.777	0.285	3.73302e-167	Proliferative B cells	CCT8
1.2881e-171	0.37534	0.597	0.163	1.12913e-166	Proliferative B cells	SNRPA1
1.57267e-171	0.300531	0.399	0.081	1.37859e-166	Proliferative B cells	EIF5AL1
1.07454e-170	0.617524	0.85	0.373	9.41935e-166	Proliferative B cells	SNX3
2.08301e-170	0.53683	0.791	0.304	1.82595e-165	Proliferative B cells	SNRPF
3.48362e-170	0.599964	0.825	0.361	3.05371e-165	Proliferative B cells	RBX1
3.66196e-170	0.260397	0.204	0.021	3.21004e-165	Proliferative B cells	TNFRSF13C
6.76575e-170	0.269975	0.234	0.025	5.93079e-165	Proliferative B cells	DUS2
6.94616e-170	0.316377	0.447	0.1	6.08894e-165	Proliferative B cells	ZCCHC10
7.96782e-170	0.292704	0.393	0.08	6.98451e-165	Proliferative B cells	POLD2
4.83882e-169	0.334078	0.44	0.101	4.24166e-164	Proliferative B cells	DCTPP1
5.68063e-169	0.575914	0.903	0.444	4.97959e-164	Proliferative B cells	PPP1CA
1.23677e-168	0.25417	0.248	0.03	1.08414e-163	Proliferative B cells	NET1
1.33015e-168	0.550156	0.769	0.298	1.166e-163	Proliferative B cells	UBE2L3
4.99567e-168	0.449585	0.724	0.238	4.37915e-163	Proliferative B cells	TMEM243
7.04924e-168	0.341203	0.548	0.145	6.1793e-163	Proliferative B cells	NSMCE1
1.01623e-167	0.278459	0.446	0.104	8.90821e-163	Proliferative B cells	DPM1
1.40511e-167	1.43073	0.807	0.449	1.2317e-162	Proliferative B cells	TUBA1B
1.41825e-167	1.02681	0.906	0.758	1.24322e-162	Proliferative B cells	RPL21
1.64136e-166	0.575867	0.805	0.325	1.4388e-161	Proliferative B cells	ATP5F1
2.54582e-166	0.555042	0.779	0.311	2.23164e-161	Proliferative B cells	C11orf31
4.0155e-166	0.649564	0.76	0.298	3.51995e-161	Proliferative B cells	HN1
7.29377e-166	0.25646	0.382	0.071	6.39365e-161	Proliferative B cells	RAD51C
2.43703e-165	0.494679	0.755	0.276	2.13628e-160	Proliferative B cells	MINOS1
4.24472e-165	0.534161	0.739	0.258	3.72088e-160	Proliferative B cells	PPP2CA
5.94345e-165	0.685334	0.948	0.456	5.20997e-160	Proliferative B cells	EZR
6.43097e-165	0.300624	0.415	0.089	5.63732e-160	Proliferative B cells	PIK3AP1
9.02024e-165	0.339468	0.526	0.134	7.90706e-160	Proliferative B cells	POLR2J3
1.34745e-164	0.843539	0.981	0.812	1.18116e-159	Proliferative B cells	RPL13A
2.79843e-164	0.463823	0.749	0.27	2.45308e-159	Proliferative B cells	KHDRBS1
1.16328e-163	0.620329	0.946	0.525	1.01972e-158	Proliferative B cells	ARPC1B
4.8493e-163	0.365633	0.49	0.122	4.25085e-158	Proliferative B cells	SEPHS2
5.59327e-163	0.398852	0.113	0.005	4.903e-158	Proliferative B cells	MEF2B
1.28057e-162	0.270985	0.218	0.024	1.12254e-157	Proliferative B cells	SCARB1
7.53491e-162	0.284013	0.5	0.125	6.60502e-157	Proliferative B cells	HDDC2
1.26634e-161	0.369438	0.559	0.153	1.11006e-156	Proliferative B cells	PTRHD1
1.37944e-161	0.268419	0.404	0.085	1.20921e-156	Proliferative B cells	CUL3
2.2768e-161	0.346496	0.499	0.122	1.99582e-156	Proliferative B cells	COA1
3.4577e-161	0.307062	0.293	0.044	3.03099e-156	Proliferative B cells	MCTP2
6.28032e-161	0.496039	0.763	0.283	5.50527e-156	Proliferative B cells	RBMX
8.63872e-161	0.26502	0.354	0.063	7.57262e-156	Proliferative B cells	MRPL35
1.48714e-160	0.320411	0.506	0.13	1.30362e-155	Proliferative B cells	COMMD8
2.78123e-160	0.763133	0.994	0.903	2.438e-155	Proliferative B cells	PTMA
3.8911e-160	0.360799	0.576	0.164	3.4109e-155	Proliferative B cells	ESD
3.58143e-159	0.502633	0.723	0.26	3.13944e-154	Proliferative B cells	HMGN3
1.32526e-158	0.384828	0.252	0.032	1.16171e-153	Proliferative B cells	MICAL3
1.65011e-158	0.510007	0.819	0.35	1.44647e-153	Proliferative B cells	SRP9
1.8185e-158	0.714332	0.759	0.338	1.59408e-153	Proliferative B cells	DEK
3.65688e-158	0.51054	0.784	0.315	3.20558e-153	Proliferative B cells	ATP5C1
1.07475e-157	0.395625	0.583	0.159	9.42116e-153	Proliferative B cells	UBE2G1
2.82158e-157	0.706319	0.886	0.521	2.47337e-152	Proliferative B cells	SLC25A6
4.77086e-157	0.46714	0.584	0.173	4.18209e-152	Proliferative B cells	HSPB11
1.20581e-156	0.289703	0.203	0.021	1.057e-151	Proliferative B cells	ZNF827
5.44481e-156	1.6361	0.733	0.33	4.77287e-151	Proliferative B cells	HIST1H4C
1.10845e-155	0.36029	0.404	0.09	9.71655e-151	Proliferative B cells	HIST1H1D
1.40673e-155	0.298957	0.391	0.082	1.23312e-150	Proliferative B cells	TMEM106C
2.65916e-155	0.260108	0.243	0.033	2.33099e-150	Proliferative B cells	COBLL1
3.31624e-155	0.317948	0.526	0.146	2.90698e-150	Proliferative B cells	MPLKIP
5.13287e-155	0.644759	0.872	0.442	4.49942e-150	Proliferative B cells	ATP5G3
6.0043e-155	0.60512	0.869	0.447	5.26331e-150	Proliferative B cells	HNRNPA3
6.97586e-155	0.341051	0.468	0.112	6.11497e-150	Proliferative B cells	HIST1H1E
1.38705e-154	0.637184	0.887	0.495	1.21588e-149	Proliferative B cells	UQCRH
4.88573e-154	0.39277	0.64	0.204	4.28279e-149	Proliferative B cells	IGBP1
5.35476e-154	0.305286	0.423	0.093	4.69393e-149	Proliferative B cells	GGCT
6.66389e-154	0.479181	0.703	0.255	5.8415e-149	Proliferative B cells	MDH1
7.26265e-154	0.689312	0.639	0.213	6.36637e-149	Proliferative B cells	CKS2
1.84235e-153	0.636808	0.841	0.409	1.61498e-148	Proliferative B cells	C14orf2
2.8898e-153	0.485206	0.765	0.301	2.53317e-148	Proliferative B cells	EIF3I
4.17851e-153	0.28042	0.441	0.104	3.66284e-148	Proliferative B cells	POLR3K
4.27409e-153	0.374543	0.4	0.087	3.74663e-148	Proliferative B cells	GOT2
6.91263e-153	0.288255	0.349	0.069	6.05955e-148	Proliferative B cells	PHF6
9.57893e-153	0.304983	0.546	0.159	8.3968e-148	Proliferative B cells	PMPCB
1.37952e-152	0.543018	0.885	0.447	1.20927e-147	Proliferative B cells	BRK1
1.62409e-152	0.367165	0.554	0.167	1.42366e-147	Proliferative B cells	MIS18BP1
3.04163e-152	0.51744	0.8	0.342	2.66626e-147	Proliferative B cells	HNRNPM
3.12734e-152	0.307208	0.367	0.072	2.7414e-147	Proliferative B cells	PHF19
5.54755e-152	0.414286	0.405	0.091	4.86293e-147	Proliferative B cells	CUX1
5.58591e-152	0.292619	0.495	0.131	4.89655e-147	Proliferative B cells	GTF2H5
1.04481e-151	0.415592	0.584	0.18	9.15872e-147	Proliferative B cells	SNX2
1.15342e-151	0.581084	0.993	0.851	1.01108e-146	Proliferative B cells	GAPDH
5.60839e-151	0.297013	0.445	0.108	4.91626e-146	Proliferative B cells	MRPL37
1.07053e-150	0.547785	0.988	0.915	9.38412e-146	Proliferative B cells	RPS6
1.09612e-150	0.341751	0.529	0.147	9.60852e-146	Proliferative B cells	MTCH2
3.64907e-150	0.563161	0.977	0.782	3.19874e-145	Proliferative B cells	RPL4
6.94698e-150	0.403845	0.641	0.21	6.08965e-145	Proliferative B cells	TMEM256
1.66849e-149	0.40654	0.423	0.101	1.46258e-144	Proliferative B cells	DNAJC10
1.89603e-149	0.473856	0.781	0.307	1.66204e-144	Proliferative B cells	CLTA
1.99867e-149	0.346675	0.691	0.237	1.75201e-144	Proliferative B cells	PSMD4
2.51434e-149	0.585551	0.839	0.401	2.20405e-144	Proliferative B cells	COX5A
2.58135e-149	0.326127	0.182	0.02	2.26279e-144	Proliferative B cells	KIAA0125
1.10204e-148	0.308535	0.466	0.113	9.66036e-144	Proliferative B cells	SAE1
1.54379e-148	0.399929	0.671	0.217	1.35327e-143	Proliferative B cells	RCSD1
3.52182e-148	0.606211	0.908	0.533	3.08719e-143	Proliferative B cells	NDUFA4
5.67823e-148	0.283159	0.464	0.12	4.97748e-143	Proliferative B cells	PFDN6
6.9987e-148	0.311756	0.472	0.126	6.13499e-143	Proliferative B cells	USP1
1.95804e-147	0.324567	0.598	0.189	1.7164e-142	Proliferative B cells	MTPN
2.18258e-147	0.283072	0.417	0.097	1.91323e-142	Proliferative B cells	TCEAL8
3.94195e-147	0.695715	0.923	0.613	3.45548e-142	Proliferative B cells	YBX1
1.21644e-146	0.274159	0.534	0.156	1.06632e-141	Proliferative B cells	MRPS16
1.35267e-146	0.416501	0.705	0.249	1.18574e-141	Proliferative B cells	HSBP1
1.62163e-146	0.252432	0.335	0.069	1.42151e-141	Proliferative B cells	PARN
4.43658e-146	0.325162	0.552	0.162	3.88906e-141	Proliferative B cells	STOML2
4.73058e-146	0.260467	0.336	0.065	4.14678e-141	Proliferative B cells	HADH
5.32048e-146	0.342604	0.56	0.167	4.66388e-141	Proliferative B cells	PLEKHJ1
6.63683e-146	0.387604	0.337	0.065	5.81778e-141	Proliferative B cells	RAB30
6.87115e-146	0.257329	0.409	0.089	6.02318e-141	Proliferative B cells	RPP30
7.78106e-146	0.603239	0.891	0.506	6.8208e-141	Proliferative B cells	RPS10
1.76145e-145	0.250345	0.314	0.059	1.54407e-140	Proliferative B cells	CCNG2
2.22331e-145	0.276288	0.332	0.066	1.94893e-140	Proliferative B cells	ACYP2
4.10193e-145	0.302159	0.544	0.16	3.59571e-140	Proliferative B cells	ATXN10
5.10963e-145	0.316819	0.565	0.171	4.47905e-140	Proliferative B cells	HSD17B10
1.5221e-144	0.285529	0.363	0.078	1.33426e-139	Proliferative B cells	RCC2
1.87903e-144	0.345802	0.645	0.204	1.64714e-139	Proliferative B cells	ITGAE
2.43333e-144	0.406919	0.576	0.177	2.13303e-139	Proliferative B cells	COX16
5.80483e-144	0.560747	0.978	0.828	5.08846e-139	Proliferative B cells	RPL10A
7.56659e-144	0.264589	0.424	0.101	6.63279e-139	Proliferative B cells	VPS25
1.02718e-143	0.304798	0.51	0.14	9.00418e-139	Proliferative B cells	CNTRL
2.06401e-143	0.291639	0.507	0.136	1.80929e-138	Proliferative B cells	MRPL28
4.01224e-143	0.346451	0.676	0.236	3.51709e-138	Proliferative B cells	MZT2A
7.6681e-143	0.292196	0.523	0.146	6.72178e-138	Proliferative B cells	CPSF6
1.00864e-142	0.274545	0.49	0.14	8.84161e-138	Proliferative B cells	TSG101
1.54835e-142	0.313751	0.498	0.133	1.35727e-137	Proliferative B cells	MRPS33
1.61407e-142	0.300822	0.457	0.113	1.41488e-137	Proliferative B cells	HAT1
2.15509e-142	0.348921	0.585	0.175	1.88913e-137	Proliferative B cells	THOC7
2.30794e-142	0.271675	0.311	0.057	2.02312e-137	Proliferative B cells	CLECL1
4.03967e-142	0.439855	0.659	0.227	3.54113e-137	Proliferative B cells	PTPN6
6.04045e-142	0.288755	0.396	0.089	5.295e-137	Proliferative B cells	RUVBL2
1.08814e-141	0.656583	0.958	0.668	9.53852e-137	Proliferative B cells	HNRNPA2B1
1.2774e-141	0.296067	0.362	0.075	1.11976e-136	Proliferative B cells	PRKCD
1.32812e-141	0.502521	0.683	0.259	1.16422e-136	Proliferative B cells	C1QBP
2.80103e-141	0.277948	0.435	0.111	2.45536e-136	Proliferative B cells	NSRP1
2.81202e-141	0.574609	0.986	0.856	2.46499e-136	Proliferative B cells	PFN1
2.90323e-141	0.540855	0.56	0.173	2.54494e-136	Proliferative B cells	SEC14L1
3.66688e-141	0.266361	0.434	0.107	3.21435e-136	Proliferative B cells	RPA1
5.193e-141	0.348622	0.525	0.145	4.55213e-136	Proliferative B cells	MX1
5.4735e-141	0.466854	0.791	0.321	4.79801e-136	Proliferative B cells	MOB1A
6.97606e-141	0.296175	0.49	0.132	6.11514e-136	Proliferative B cells	SNF8
8.46307e-141	0.530935	0.797	0.351	7.41864e-136	Proliferative B cells	SHFM1
1.03339e-140	0.387515	0.588	0.183	9.05859e-136	Proliferative B cells	SMS
3.76974e-140	0.26946	0.297	0.053	3.30452e-135	Proliferative B cells	RABEP2
4.51643e-140	0.43043	0.482	0.126	3.95906e-135	Proliferative B cells	ST6GAL1
8.12698e-140	0.642977	0.924	0.581	7.12403e-135	Proliferative B cells	OAZ1
9.50457e-140	0.308112	0.466	0.119	8.33161e-135	Proliferative B cells	TIFA
2.15836e-139	0.629302	0.815	0.403	1.892e-134	Proliferative B cells	SNRPG
2.63613e-139	0.505523	0.819	0.399	2.3108e-134	Proliferative B cells	SNRPB
4.25974e-139	0.37513	0.639	0.209	3.73404e-134	Proliferative B cells	GGNBP2
5.67633e-139	0.265705	0.363	0.076	4.97581e-134	Proliferative B cells	MTX1
1.19312e-138	0.274238	0.494	0.138	1.04588e-133	Proliferative B cells	PFDN4
1.35689e-138	0.311755	0.564	0.172	1.18943e-133	Proliferative B cells	ETFA
2.92338e-138	0.459667	0.789	0.323	2.56261e-133	Proliferative B cells	YWHAE
3.01719e-138	0.341381	0.305	0.06	2.64484e-133	Proliferative B cells	SNX29
3.43878e-138	0.280975	0.544	0.164	3.0144e-133	Proliferative B cells	FIBP
5.58749e-138	0.414782	0.752	0.293	4.89793e-133	Proliferative B cells	PPP4C
8.51673e-138	0.318664	0.652	0.215	7.46568e-133	Proliferative B cells	BPTF
1.97719e-137	0.358097	0.273	0.05	1.73319e-132	Proliferative B cells	GNG7
3.76507e-137	0.342994	0.729	0.262	3.30042e-132	Proliferative B cells	CSNK2B
8.89007e-137	0.327948	0.514	0.15	7.79295e-132	Proliferative B cells	PSMD14
9.02305e-137	0.321729	0.653	0.223	7.90951e-132	Proliferative B cells	PSMB7
1.06929e-136	0.266966	0.535	0.165	9.37332e-132	Proliferative B cells	CDC123
4.14154e-136	0.564055	0.947	0.712	3.63043e-131	Proliferative B cells	BTF3
6.78224e-136	0.367584	0.619	0.208	5.94524e-131	Proliferative B cells	FABP5
9.90712e-136	0.512734	0.801	0.36	8.68448e-131	Proliferative B cells	NDUFA13
9.90721e-136	0.256523	0.409	0.1	8.68456e-131	Proliferative B cells	COMMD3
1.69444e-135	0.466545	0.775	0.333	1.48533e-130	Proliferative B cells	NDUFB1
3.64322e-135	0.348925	0.686	0.246	3.19361e-130	Proliferative B cells	PNN
4.14657e-135	0.277006	0.171	0.019	3.63484e-130	Proliferative B cells	PIF1
4.14777e-135	0.26449	0.513	0.143	3.63589e-130	Proliferative B cells	LARP7
6.45068e-135	0.330207	0.681	0.244	5.6546e-130	Proliferative B cells	BLOC1S1
1.05129e-134	0.318028	0.592	0.197	9.21546e-130	Proliferative B cells	CYB5R3
1.97195e-134	0.337876	0.481	0.135	1.72859e-129	Proliferative B cells	BLOC1S6
2.2101e-134	0.343972	0.47	0.127	1.93735e-129	Proliferative B cells	HIST1H1C
2.77629e-134	0.362744	0.591	0.189	2.43367e-129	Proliferative B cells	TACC1
3.57891e-134	0.544238	0.9	0.486	3.13724e-129	Proliferative B cells	SRSF3
4.31611e-134	0.371933	0.505	0.151	3.78346e-129	Proliferative B cells	NCOA3
6.40131e-134	0.309051	0.532	0.155	5.61132e-129	Proliferative B cells	UBE2V2
1.76231e-133	0.350392	0.5	0.141	1.54483e-128	Proliferative B cells	SSRP1
2.00631e-133	0.481145	0.905	0.47	1.75871e-128	Proliferative B cells	EIF3H
2.39012e-133	0.511257	0.9	0.494	2.09515e-128	Proliferative B cells	SLC25A3
6.23941e-133	0.27895	0.481	0.138	5.4694e-128	Proliferative B cells	MRPL22
1.23435e-132	0.328559	0.481	0.139	1.08202e-127	Proliferative B cells	TIMM10
2.42375e-132	0.258636	0.295	0.051	2.12464e-127	Proliferative B cells	RAD17
3.66242e-132	0.553244	0.835	0.417	3.21044e-127	Proliferative B cells	POMP
3.76766e-132	0.347996	0.466	0.129	3.30269e-127	Proliferative B cells	GTF2I
5.14828e-132	0.374699	0.482	0.136	4.51293e-127	Proliferative B cells	CPNE3
7.15851e-132	0.264739	0.315	0.067	6.27507e-127	Proliferative B cells	PAICS
9.0229e-132	0.342752	0.596	0.198	7.90938e-127	Proliferative B cells	NUDT21
1.16885e-131	0.251262	0.5	0.145	1.0246e-126	Proliferative B cells	PMVK
1.81613e-131	0.281623	0.556	0.174	1.592e-126	Proliferative B cells	CAMTA1
4.38327e-131	0.258027	0.223	0.033	3.84233e-126	Proliferative B cells	DNASE1
6.88047e-131	0.599993	0.832	0.413	6.03135e-126	Proliferative B cells	GSTP1
7.51766e-131	0.420517	0.784	0.313	6.5899e-126	Proliferative B cells	TMEM123
2.95083e-130	0.287395	0.408	0.106	2.58667e-125	Proliferative B cells	UBE2R2
3.33976e-130	0.270764	0.454	0.125	2.9276e-125	Proliferative B cells	MRPL16
8.25161e-130	0.372736	0.622	0.223	7.23328e-125	Proliferative B cells	CHCHD10
1.02995e-129	0.573736	0.879	0.529	9.0284e-125	Proliferative B cells	COX6C
1.24755e-129	0.577035	0.757	0.335	1.09359e-124	Proliferative B cells	NBEAL1
2.10641e-129	0.328163	0.535	0.173	1.84646e-124	Proliferative B cells	TMPO
1.03865e-128	0.386113	0.691	0.257	9.10472e-124	Proliferative B cells	TCEB1
2.02964e-128	0.352928	0.612	0.217	1.77916e-123	Proliferative B cells	DNAJC15
3.23399e-128	0.326212	0.639	0.217	2.83488e-123	Proliferative B cells	SFT2D1
5.05854e-128	0.4732	0.839	0.382	4.43427e-123	Proliferative B cells	TRAPPC1
7.37184e-128	0.415352	0.717	0.294	6.46208e-123	Proliferative B cells	EIF2S2
1.60155e-127	0.305083	0.544	0.173	1.4039e-122	Proliferative B cells	CD2BP2
1.60811e-127	0.268573	0.318	0.066	1.40965e-122	Proliferative B cells	DENND3
2.32084e-127	0.289911	0.426	0.117	2.03442e-122	Proliferative B cells	FAM60A
3.16974e-127	0.403756	0.71	0.279	2.77856e-122	Proliferative B cells	NDUFA12
5.10337e-127	0.267373	0.451	0.125	4.47356e-122	Proliferative B cells	SPINT2
7.16989e-127	0.433248	0.821	0.339	6.28505e-122	Proliferative B cells	RHOH
1.53001e-126	0.317276	0.319	0.072	1.34119e-121	Proliferative B cells	LILRB1
1.84594e-126	0.408685	0.695	0.269	1.61813e-121	Proliferative B cells	PSMB2
2.81145e-126	0.302488	0.524	0.157	2.46449e-121	Proliferative B cells	CEP57
3.75568e-126	0.476301	0.802	0.369	3.29219e-121	Proliferative B cells	PSMB3
5.01272e-126	0.629217	0.978	0.588	4.3941e-121	Proliferative B cells	CD37
5.01284e-126	0.409464	0.616	0.217	4.3942e-121	Proliferative B cells	LSM4
1.01514e-125	0.32341	0.571	0.188	8.89861e-121	Proliferative B cells	MRPS36
1.47999e-125	0.323801	0.596	0.198	1.29735e-120	Proliferative B cells	BLOC1S2
1.51107e-125	0.557131	0.926	0.525	1.32459e-120	Proliferative B cells	CD53
2.08057e-125	0.250444	0.58	0.187	1.82381e-120	Proliferative B cells	SHKBP1
3.17496e-125	0.264782	0.448	0.127	2.78314e-120	Proliferative B cells	SHMT2
6.86745e-125	0.265152	0.547	0.175	6.01994e-120	Proliferative B cells	ATP6V1E1
1.33457e-124	0.348635	0.538	0.182	1.16987e-119	Proliferative B cells	HNRNPAB
2.18617e-124	0.270476	0.51	0.157	1.91638e-119	Proliferative B cells	ELAVL1
7.79113e-124	0.345847	0.529	0.167	6.82963e-119	Proliferative B cells	IMPDH2
1.00433e-123	0.30662	0.589	0.211	8.80382e-119	Proliferative B cells	YWHAH
1.45583e-123	0.293942	0.574	0.186	1.27617e-118	Proliferative B cells	FDFT1
1.5633e-123	0.344664	0.46	0.131	1.37037e-118	Proliferative B cells	SMC1A
2.05887e-123	0.256767	0.35	0.082	1.80478e-118	Proliferative B cells	METTL21A
2.42463e-123	0.275589	0.385	0.095	2.12541e-118	Proliferative B cells	GCA
1.26778e-122	0.255585	0.516	0.16	1.11133e-117	Proliferative B cells	USP34
1.46857e-122	0.374695	0.604	0.204	1.28733e-117	Proliferative B cells	C17orf62
3.05297e-122	0.287654	0.373	0.087	2.67621e-117	Proliferative B cells	RFX5
4.14092e-122	0.495175	0.871	0.488	3.62989e-117	Proliferative B cells	LDHB
4.3826e-122	0.250744	0.436	0.115	3.84174e-117	Proliferative B cells	MGMT
4.45168e-122	0.310298	0.176	0.02	3.9023e-117	Proliferative B cells	FCER2
5.33217e-122	0.495554	0.982	0.887	4.67413e-117	Proliferative B cells	RPL23A
1.77123e-121	0.451489	0.82	0.374	1.55264e-116	Proliferative B cells	SEC62
2.29525e-121	0.276286	0.472	0.144	2.012e-116	Proliferative B cells	COPS3
2.48609e-121	0.276062	0.609	0.209	2.17928e-116	Proliferative B cells	POLR2J
3.2174e-121	0.251414	0.385	0.095	2.82034e-116	Proliferative B cells	MFAP1
3.28887e-121	0.342887	0.651	0.245	2.88299e-116	Proliferative B cells	GTF2A2
3.41456e-121	0.435751	0.73	0.304	2.99317e-116	Proliferative B cells	COX17
9.04977e-121	0.474414	0.984	0.751	7.93294e-116	Proliferative B cells	GNB2L1
1.19627e-120	0.280868	0.441	0.121	1.04864e-115	Proliferative B cells	SH3BP5
1.33024e-120	0.278513	0.414	0.108	1.16608e-115	Proliferative B cells	MRPS23
2.60305e-120	0.362421	0.781	0.339	2.28181e-115	Proliferative B cells	LSM7
3.32709e-120	0.306286	0.49	0.148	2.9165e-115	Proliferative B cells	NCF4
3.92749e-120	0.271162	0.54	0.166	3.4428e-115	Proliferative B cells	SP140
7.59573e-120	0.340922	0.588	0.204	6.65834e-115	Proliferative B cells	TXNDC17
7.72155e-119	0.34897	0.743	0.305	6.76864e-114	Proliferative B cells	THRAP3
1.42501e-118	0.292285	0.697	0.27	1.24915e-113	Proliferative B cells	ARPC5L
2.4867e-118	0.507331	0.848	0.42	2.17982e-113	Proliferative B cells	C4orf3
5.90814e-118	0.252848	0.566	0.183	5.17902e-113	Proliferative B cells	SDHD
6.17501e-118	0.41054	0.644	0.246	5.41296e-113	Proliferative B cells	TOP1
8.5338e-118	0.390672	0.615	0.235	7.48064e-113	Proliferative B cells	SLIRP
1.34042e-117	0.275937	0.644	0.239	1.17499e-112	Proliferative B cells	ACP1
2.18341e-117	0.375161	0.709	0.296	1.91395e-112	Proliferative B cells	ENY2
3.18082e-117	0.603494	0.886	0.449	2.78828e-112	Proliferative B cells	ISG20
3.2582e-117	0.278938	0.564	0.182	2.8561e-112	Proliferative B cells	PPHLN1
3.63426e-117	0.2887	0.567	0.187	3.18575e-112	Proliferative B cells	TXN2
5.12346e-117	0.285428	0.414	0.117	4.49118e-112	Proliferative B cells	CDK4
7.9989e-117	0.332512	0.641	0.249	7.01176e-112	Proliferative B cells	VPS29
9.32773e-117	0.272738	0.618	0.219	8.17659e-112	Proliferative B cells	FERMT3
2.62292e-116	0.381092	0.7	0.288	2.29922e-111	Proliferative B cells	BANF1
3.76914e-116	0.581097	0.911	0.572	3.30399e-111	Proliferative B cells	RPL17
4.01115e-116	0.408883	0.962	0.729	3.51613e-111	Proliferative B cells	RPL23
4.25233e-116	0.275642	0.498	0.15	3.72755e-111	Proliferative B cells	PLEKHA2
4.72279e-116	0.287057	0.457	0.138	4.13995e-111	Proliferative B cells	C17orf89
5.66346e-116	0.300845	0.351	0.088	4.96454e-111	Proliferative B cells	CD86
9.01535e-116	0.306989	0.641	0.235	7.90276e-111	Proliferative B cells	SNRPC
9.7949e-116	0.358345	0.675	0.269	8.58611e-111	Proliferative B cells	ILF2
1.23354e-115	0.267979	0.488	0.147	1.08131e-110	Proliferative B cells	RAD23B
4.11593e-115	0.283647	0.309	0.072	3.60798e-110	Proliferative B cells	ALOX5
6.38779e-115	0.53589	0.951	0.72	5.59947e-110	Proliferative B cells	PPIA
2.4398e-114	0.333164	0.273	0.057	2.1387e-109	Proliferative B cells	DGKD
3.49715e-114	0.433933	0.8	0.372	3.06556e-109	Proliferative B cells	SET
6.05872e-114	0.292204	0.594	0.21	5.31102e-109	Proliferative B cells	NUTF2
9.11057e-114	0.322101	0.776	0.344	7.98624e-109	Proliferative B cells	FAM49B
9.74309e-114	0.397318	0.794	0.367	8.54069e-109	Proliferative B cells	UBE2I
1.29462e-112	0.251014	0.257	0.05	1.13485e-107	Proliferative B cells	CHD7
1.80561e-112	0.31564	0.522	0.171	1.58278e-107	Proliferative B cells	PSMC1
2.74645e-112	0.289205	0.47	0.145	2.40751e-107	Proliferative B cells	LYSMD2
1.4945e-111	0.410498	0.171	0.022	1.31006e-106	Proliferative B cells	INS
1.65004e-111	0.48573	0.911	0.543	1.44641e-106	Proliferative B cells	COX6A1
2.95518e-111	0.251707	0.324	0.079	2.59048e-106	Proliferative B cells	MCM6
7.52205e-111	0.25454	0.544	0.185	6.59375e-106	Proliferative B cells	TIMM8B
1.14476e-110	0.302109	0.645	0.251	1.00349e-105	Proliferative B cells	TOMM22
1.21398e-109	0.280572	0.427	0.126	1.06417e-104	Proliferative B cells	NIN
1.56954e-109	0.313991	0.469	0.146	1.37584e-104	Proliferative B cells	H2AFX
1.58424e-109	0.291841	0.604	0.22	1.38873e-104	Proliferative B cells	MMADHC
2.40408e-109	0.282515	0.669	0.254	2.10739e-104	Proliferative B cells	HADHA
2.41716e-109	0.377043	0.793	0.358	2.11886e-104	Proliferative B cells	SUMO1
2.47088e-109	0.295707	0.369	0.098	2.16594e-104	Proliferative B cells	USP7
1.78421e-108	0.283041	0.691	0.286	1.56402e-103	Proliferative B cells	SNRPB2
2.64906e-108	0.416629	0.285	0.063	2.32214e-103	Proliferative B cells	CIITA
3.45191e-108	0.283159	0.382	0.107	3.02591e-103	Proliferative B cells	TBC1D1
3.65554e-108	0.278531	0.529	0.178	3.20441e-103	Proliferative B cells	SMC3
4.97363e-108	0.277568	0.554	0.197	4.35984e-103	Proliferative B cells	RNASEH2C
1.24077e-107	0.352635	0.814	0.396	1.08765e-102	Proliferative B cells	COPE
2.23684e-107	0.296786	0.474	0.148	1.96079e-102	Proliferative B cells	ZNF106
3.03802e-107	0.316473	0.706	0.296	2.6631e-102	Proliferative B cells	SSBP1
3.28296e-107	0.325928	0.725	0.321	2.87781e-102	Proliferative B cells	EIF3M
3.3102e-107	0.323554	0.653	0.247	2.90168e-102	Proliferative B cells	UBE2A
5.74179e-107	0.257137	0.514	0.157	5.03319e-102	Proliferative B cells	MATR3
5.80877e-107	0.280749	0.532	0.184	5.09191e-102	Proliferative B cells	TIMM13
8.91613e-107	0.2528	0.583	0.208	7.81579e-102	Proliferative B cells	DNAJC7
2.99958e-106	0.47332	0.845	0.438	2.6294e-101	Proliferative B cells	ATP5B
4.48147e-106	0.275183	0.698	0.275	3.92841e-101	Proliferative B cells	LUC7L3
5.54023e-106	0.262758	0.499	0.158	4.85651e-101	Proliferative B cells	MDM4
6.29464e-106	0.322131	0.691	0.283	5.51781e-101	Proliferative B cells	DNAJC8
8.78535e-106	0.265962	0.643	0.241	7.70115e-101	Proliferative B cells	NDUFAF3
1.15539e-105	0.337003	0.722	0.312	1.0128e-100	Proliferative B cells	SNRPD3
1.27425e-105	0.252437	0.594	0.212	1.117e-100	Proliferative B cells	NDUFB5
1.41481e-105	0.305719	0.578	0.204	1.24021e-100	Proliferative B cells	CDV3
2.90936e-105	0.250041	0.365	0.099	2.55031e-100	Proliferative B cells	AHCY
4.81634e-105	0.390418	0.74	0.333	4.22195e-100	Proliferative B cells	RAC1
6.83373e-105	0.354376	0.212	0.037	5.99038e-100	Proliferative B cells	FCRL5
9.40083e-105	0.447936	0.884	0.49	8.24068e-100	Proliferative B cells	PKM
1.12348e-104	0.32323	0.616	0.233	9.84828e-100	Proliferative B cells	CCT5
4.51557e-104	0.295482	0.706	0.293	3.95831e-99	Proliferative B cells	MDH2
8.54493e-104	0.271523	0.579	0.215	7.4904e-99	Proliferative B cells	CYC1
1.93355e-101	0.263731	0.658	0.262	1.69493e-96	Proliferative B cells	ANP32A
2.17398e-101	0.333259	0.652	0.277	1.90569e-96	Proliferative B cells	NDUFAB1
2.45177e-101	0.257644	0.753	0.321	2.1492e-96	Proliferative B cells	EIF3D
3.96215e-101	0.287412	0.399	0.118	3.47318e-96	Proliferative B cells	EHMT1
6.78264e-101	0.279632	0.52	0.174	5.9456e-96	Proliferative B cells	MRPS15
1.06259e-100	0.527375	0.989	0.712	9.31453e-96	Proliferative B cells	LAPTM5
1.06663e-100	0.304272	0.549	0.199	9.34994e-96	Proliferative B cells	PRMT1
1.41855e-100	0.341696	0.788	0.373	1.24349e-95	Proliferative B cells	CALM3
1.88243e-100	0.352323	0.848	0.429	1.65012e-95	Proliferative B cells	SERBP1
2.60692e-100	0.340758	0.579	0.223	2.2852e-95	Proliferative B cells	ATP5G1
3.16546e-100	0.388753	0.989	0.884	2.77481e-95	Proliferative B cells	RPS16
4.57799e-100	0.261425	0.523	0.181	4.01302e-95	Proliferative B cells	SNRPA
7.23217e-100	0.272211	0.675	0.262	6.33965e-95	Proliferative B cells	LSM14A
7.39265e-100	0.40568	0.824	0.426	6.48032e-95	Proliferative B cells	PSMB1
1.16888e-99	0.325533	0.766	0.338	1.02463e-94	Proliferative B cells	NDUFA11
2.24646e-99	0.486965	0.999	0.974	1.96922e-94	Proliferative B cells	TMSB4X
2.38718e-99	0.266959	0.664	0.28	2.09257e-94	Proliferative B cells	MRPL20
3.23999e-99	0.282052	0.635	0.253	2.84014e-94	Proliferative B cells	RBM17
3.24219e-99	0.26266	0.546	0.193	2.84207e-94	Proliferative B cells	PSMC3
3.61383e-99	0.342181	0.8	0.382	3.16785e-94	Proliferative B cells	NEDD8
4.39737e-99	0.261267	0.595	0.232	3.85469e-94	Proliferative B cells	IDH2
5.31568e-99	0.283742	0.547	0.196	4.65967e-94	Proliferative B cells	HSPA4
2.31408e-98	0.411433	0.91	0.571	2.0285e-93	Proliferative B cells	HNRNPK
2.4301e-98	0.271144	0.475	0.158	2.1302e-93	Proliferative B cells	PRKDC
2.94812e-98	0.462564	0.918	0.633	2.58429e-93	Proliferative B cells	CHCHD2
3.73058e-98	0.269703	0.167	0.025	3.27019e-93	Proliferative B cells	LRRK1
5.02451e-98	0.274324	0.253	0.058	4.40444e-93	Proliferative B cells	CAMK1
3.28589e-97	0.343353	0.996	0.827	2.88038e-92	Proliferative B cells	RPS11
2.90332e-96	0.317831	0.715	0.308	2.54502e-91	Proliferative B cells	NDUFA2
1.23197e-95	0.255279	0.709	0.302	1.07993e-90	Proliferative B cells	POLR1D
2.88111e-95	0.358731	0.759	0.35	2.52555e-90	Proliferative B cells	ROMO1
2.49709e-94	0.412306	0.89	0.522	2.18893e-89	Proliferative B cells	HNRNPC
4.60112e-94	0.341354	0.721	0.33	4.03329e-89	Proliferative B cells	NDUFV2
6.4631e-94	0.358095	0.747	0.325	5.66549e-89	Proliferative B cells	TPM4
9.23764e-94	0.267335	0.669	0.281	8.09762e-89	Proliferative B cells	HNRNPR
1.01621e-93	0.293929	0.296	0.074	8.90802e-89	Proliferative B cells	ADAM28
3.96474e-93	0.281334	0.759	0.339	3.47545e-88	Proliferative B cells	TERF2IP
3.96398e-92	0.586715	0.911	0.619	3.47479e-87	Proliferative B cells	CALM2
1.36347e-91	0.392142	0.876	0.488	1.19521e-86	Proliferative B cells	EIF3F
2.12256e-90	0.326912	0.558	0.217	1.86061e-85	Proliferative B cells	ERP44
4.3234e-90	0.301503	0.777	0.373	3.78985e-85	Proliferative B cells	ARL6IP4
2.35836e-89	0.291069	0.639	0.262	2.06731e-84	Proliferative B cells	MRPL52
2.97302e-89	0.299338	0.676	0.29	2.60612e-84	Proliferative B cells	UQCRFS1
5.01612e-89	0.267023	0.589	0.237	4.39708e-84	Proliferative B cells	CCT2
5.13684e-89	0.366189	0.801	0.411	4.5029e-84	Proliferative B cells	UQCRQ
5.46084e-89	0.398475	0.977	0.762	4.78692e-84	Proliferative B cells	ARHGDIB
1.2466e-88	0.29936	0.707	0.326	1.09275e-83	Proliferative B cells	TUFM
3.35791e-88	0.314605	0.787	0.36	2.94351e-83	Proliferative B cells	SPCS2
1.1409e-87	0.29783	0.882	0.481	1.0001e-82	Proliferative B cells	CAP1
1.43739e-87	0.417239	0.97	0.711	1.26001e-82	Proliferative B cells	EEF2
5.94555e-87	0.274195	0.788	0.372	5.21181e-82	Proliferative B cells	CAPZA1
1.35694e-86	0.602076	0.839	0.608	1.18948e-81	Proliferative B cells	RPL36A
1.91586e-86	0.326779	0.784	0.386	1.67942e-81	Proliferative B cells	MTDH
2.13728e-86	0.334794	0.855	0.481	1.87351e-81	Proliferative B cells	EIF3E
2.77517e-86	0.282498	0.977	0.816	2.43268e-81	Proliferative B cells	RPL31
4.21929e-86	0.283684	0.701	0.312	3.69859e-81	Proliferative B cells	VDAC1
4.96936e-86	0.32371	0.88	0.483	4.35609e-81	Proliferative B cells	RBM3
6.89621e-86	0.269882	0.754	0.345	6.04515e-81	Proliferative B cells	PRDX5
1.26587e-84	0.357148	0.984	0.841	1.10965e-79	Proliferative B cells	RPS5
2.95271e-84	0.384552	0.952	0.71	2.58831e-79	Proliferative B cells	COX7C
2.07603e-83	0.301522	0.847	0.43	1.81983e-78	Proliferative B cells	FKBP1A
7.86561e-83	0.407541	0.912	0.601	6.89492e-78	Proliferative B cells	SUMO2
1.59297e-82	0.253577	0.701	0.309	1.39639e-77	Proliferative B cells	EWSR1
2.30122e-82	0.332186	0.444	0.151	2.01723e-77	Proliferative B cells	HOPX
2.84395e-82	0.265863	0.676	0.313	2.49298e-77	Proliferative B cells	ANAPC11
4.1357e-82	0.447015	0.758	0.389	3.62532e-77	Proliferative B cells	RPS27L
1.62398e-81	0.256939	0.711	0.321	1.42357e-76	Proliferative B cells	MRPS21
2.41562e-81	0.363429	0.942	0.673	2.1175e-76	Proliferative B cells	SRP14
5.3863e-81	0.251229	0.433	0.146	4.72157e-76	Proliferative B cells	LPIN1
6.86349e-81	0.251389	0.633	0.26	6.01647e-76	Proliferative B cells	MAGOH
1.12301e-80	0.405248	0.893	0.594	9.84419e-76	Proliferative B cells	UQCRB
1.37667e-78	0.339993	0.887	0.558	1.20677e-73	Proliferative B cells	COX6B1
8.42444e-78	0.400425	0.958	0.857	7.38478e-73	Proliferative B cells	RPL3
1.22161e-77	0.318726	0.865	0.487	1.07085e-72	Proliferative B cells	TCEB2
7.41875e-77	0.268712	0.808	0.431	6.5032e-72	Proliferative B cells	UBE2D2
9.17153e-77	0.264085	0.718	0.336	8.03968e-72	Proliferative B cells	PSMD8
3.15652e-76	0.287514	0.622	0.278	2.76697e-71	Proliferative B cells	RAD21
9.50163e-76	0.34867	0.847	0.504	8.32903e-71	Proliferative B cells	COX8A
1.36012e-75	0.425377	0.841	0.475	1.19227e-70	Proliferative B cells	DYNLL1
1.89381e-75	0.277361	0.607	0.273	1.6601e-70	Proliferative B cells	PRDX2
1.99545e-74	0.319175	0.77	0.395	1.74919e-69	Proliferative B cells	RAP1B
3.1818e-74	0.271516	0.82	0.447	2.78913e-69	Proliferative B cells	ATP5I
3.51688e-74	0.282769	0.739	0.357	3.08287e-69	Proliferative B cells	XRCC6
2.26523e-73	0.318863	0.989	0.876	1.98568e-68	Proliferative B cells	RPL37A
7.84441e-73	0.371166	0.837	0.539	6.87633e-68	Proliferative B cells	MT.CO3
1.84971e-72	0.335344	0.873	0.504	1.62144e-67	Proliferative B cells	ATP6V1G1
6.65686e-72	0.271765	0.707	0.34	5.83534e-67	Proliferative B cells	RPL22L1
8.27885e-71	0.427739	0.651	0.31	7.25716e-66	Proliferative B cells	ARL6IP1
5.57394e-69	0.258732	0.824	0.472	4.88606e-64	Proliferative B cells	PARK7
5.66307e-69	0.307659	0.796	0.439	4.96419e-64	Proliferative B cells	HNRNPF
3.92311e-67	0.257958	0.859	0.496	3.43896e-62	Proliferative B cells	COTL1
4.23342e-67	0.518302	0.59	0.299	3.71097e-62	Proliferative B cells	TUBB4B
1.80677e-66	0.255002	0.863	0.49	1.5838e-61	Proliferative B cells	CAPZB
2.07757e-66	0.327334	0.989	0.932	1.82118e-61	Proliferative B cells	RPS18
6.80856e-66	0.286463	0.989	0.892	5.96832e-61	Proliferative B cells	RPL8
7.36464e-66	0.313465	0.875	0.539	6.45577e-61	Proliferative B cells	PSMA7
9.6965e-64	0.276936	0.844	0.49	8.49985e-59	Proliferative B cells	SRSF2
7.51116e-63	0.334551	0.109	0.016	6.58421e-58	Proliferative B cells	AL928768.3
7.83877e-63	0.289033	0.873	0.531	6.87139e-58	Proliferative B cells	ENO1
4.42777e-61	0.285756	0.863	0.552	3.88133e-56	Proliferative B cells	COX7A2
7.71212e-60	0.330994	0.947	0.741	6.76037e-55	Proliferative B cells	RPL22
8.44366e-60	0.352075	0.603	0.292	7.40163e-55	Proliferative B cells	RPS4Y1
1.38356e-59	0.267362	0.506	0.23	1.21281e-54	Proliferative B cells	DSTN
1.74583e-58	0.306532	0.779	0.449	1.53038e-53	Proliferative B cells	USMG5
2.27613e-58	0.368556	0.928	0.603	1.99523e-53	Proliferative B cells	CCNI
9.17528e-57	0.296981	0.978	0.891	8.04296e-52	Proliferative B cells	RPL26
3.55524e-56	0.375316	0.886	0.601	3.11648e-51	Proliferative B cells	RPS28
1.06735e-53	0.260301	0.983	0.9	9.3563e-49	Proliferative B cells	RPS23
1.1469e-49	0.279584	0.974	0.784	1.00536e-44	Proliferative B cells	MYL6
3.57378e-49	0.267162	0.975	0.885	3.13274e-44	Proliferative B cells	RPS7
4.28559e-44	0.254704	0.841	0.539	3.75671e-39	Proliferative B cells	MT.CO1
7.76268e-44	0.275244	0.963	0.797	6.80469e-39	Proliferative B cells	RPSA
1.58403e-42	0.426167	0.161	0.05	1.38855e-37	Proliferative B cells	NAPSB

## Sheet: Plasma B cells
p_val	avg_logFC	pct.1	pct.2	p_val_adj	cluster	gene
0	0.251288	0.408	0.138	0	Plasma B cells	H1FX
0	0.251453	0.478	0.101	0	Plasma B cells	CCPG1
0	0.25259	0.484	0.095	0	Plasma B cells	HSH2D
0	0.253828	0.334	0.046	0	Plasma B cells	EIF2AK3
0	0.254347	0.378	0.069	0	Plasma B cells	MAN1A1
0	0.255297	0.355	0.046	0	Plasma B cells	C11orf24
0	0.25677	0.639	0.174	0	Plasma B cells	DNAJC1
0	0.257036	0.216	0.029	0	Plasma B cells	RNU12
0	0.257102	0.269	0.005	0	Plasma B cells	AC104699.1
0	0.258744	0.207	0	0	Plasma B cells	FAM92B
0	0.263052	0.593	0.158	0	Plasma B cells	SEC14L1
0	0.264034	0.174	0.006	0	Plasma B cells	RASSF6
0	0.268226	0.725	0.275	0	Plasma B cells	ARF4
0	0.269496	0.511	0.105	0	Plasma B cells	LY96
0	0.273208	0.783	0.269	0	Plasma B cells	ATF4
0	0.273595	0.525	0.107	0	Plasma B cells	MEF2C
0	0.274074	0.756	0.299	0	Plasma B cells	LMAN2
0	0.275996	0.824	0.358	0	Plasma B cells	SEC62
0	0.277987	0.495	0.099	0	Plasma B cells	CALU
0	0.284992	0.446	0.08	0	Plasma B cells	SRM
0	0.286513	0.479	0.074	0	Plasma B cells	CHID1
0	0.289115	0.288	0.015	0	Plasma B cells	TRAM2
0	0.292381	0.804	0.338	0	Plasma B cells	TMED2
0	0.294462	0.572	0.134	0	Plasma B cells	NANS
0	0.298478	0.312	0.007	0	Plasma B cells	PYCR1
0	0.299103	0.223	0.034	0	Plasma B cells	PTP4A3
0	0.301746	0.643	0.181	0	Plasma B cells	DNAJB11
0	0.304346	0.315	0.03	0	Plasma B cells	GAS6
0	0.306675	0.327	0.012	0	Plasma B cells	PNOC
0	0.307047	0.241	0.003	0	Plasma B cells	CCR10
0	0.313777	0.429	0.053	0	Plasma B cells	GMPPB
0	0.314349	0.291	0.037	0	Plasma B cells	RP11.160E2.6
0	0.317589	0.321	0.018	0	Plasma B cells	SLC17A9
0	0.32055	0.288	0.002	0	Plasma B cells	KCNN3
0	0.320771	0.319	0.028	0	Plasma B cells	ITGA6
0	0.322088	0.394	0.038	0	Plasma B cells	MANEA
0	0.322472	0.697	0.273	0	Plasma B cells	RPN1
0	0.322509	0.492	0.065	0	Plasma B cells	ZBP1
0	0.322912	0.841	0.414	0	Plasma B cells	SEC61G
0	0.326713	0.82	0.322	0	Plasma B cells	TRAM1
0	0.333296	0.416	0.037	0	Plasma B cells	GNG7
0	0.336635	0.75	0.271	0	Plasma B cells	OSTC
0	0.338106	0.463	0.057	0	Plasma B cells	MEI1
0	0.340635	0.234	0.022	0	Plasma B cells	HIST1H2BJ
0	0.342822	0.633	0.158	0	Plasma B cells	TMEM208
0	0.343696	0.468	0.057	0	Plasma B cells	ST6GALNAC4
0	0.344213	0.415	0.052	0	Plasma B cells	CLPTM1L
0	0.345126	0.751	0.278	0	Plasma B cells	TMED9
0	0.349441	0.515	0.094	0	Plasma B cells	FNDC3A
0	0.350886	0.862	0.397	0	Plasma B cells	GSTP1
0	0.352209	0.864	0.444	0	Plasma B cells	TMEM258
0	0.352894	0.491	0.108	0	Plasma B cells	TOR3A
0	0.35365	0.429	0.069	0	Plasma B cells	TP53INP1
0	0.355	0.639	0.158	0	Plasma B cells	DNAJC3
0	0.369911	0.353	0.025	0	Plasma B cells	CKAP4
0	0.370263	0.945	0.647	0	Plasma B cells	CYBA
0	0.375226	0.402	0.065	0	Plasma B cells	CPEB4
0	0.377712	0.336	0.022	0	Plasma B cells	COBLL1
0	0.379666	0.591	0.111	0	Plasma B cells	SRPRB
0	0.37984	0.244	0.013	0	Plasma B cells	HIST1H2BG
0	0.380012	0.433	0.052	0	Plasma B cells	CLIC4
0	0.385192	0.332	0.013	0	Plasma B cells	CAV1
0	0.386328	0.555	0.111	0	Plasma B cells	ST6GAL1
0	0.386397	0.897	0.519	0	Plasma B cells	SERP1
0	0.388447	0.521	0.086	0	Plasma B cells	CREB3L2
0	0.397384	0.434	0.04	0	Plasma B cells	BLNK
0	0.399223	0.837	0.344	0	Plasma B cells	P4HB
0	0.399713	0.77	0.256	0	Plasma B cells	ERGIC3
0	0.39973	0.199	0.014	0	Plasma B cells	KIAA0125
0	0.401176	0.648	0.166	0	Plasma B cells	SEC61A1
0	0.414794	0.797	0.292	0	Plasma B cells	TMED10
0	0.416269	0.511	0.057	0	Plasma B cells	SIL1
0	0.416961	0.877	0.44	0	Plasma B cells	TMEM59
0	0.418975	0.44	0.045	0	Plasma B cells	EAF2
0	0.421151	0.344	0.002	0	Plasma B cells	RP11.16E12.2
0	0.427712	0.486	0.066	0	Plasma B cells	TRIB1
0	0.428135	0.56	0.085	0	Plasma B cells	ARSA
0	0.43404	0.607	0.106	0	Plasma B cells	ALG5
0	0.437344	0.265	0.007	0	Plasma B cells	TXNDC5
0	0.444945	0.336	0.002	0	Plasma B cells	RP11.290F5.1
0	0.446061	0.554	0.08	0	Plasma B cells	FNDC3B
0	0.448075	0.436	0.021	0	Plasma B cells	CPNE5
0	0.452844	0.431	0.052	0	Plasma B cells	RAB30
0	0.469678	0.864	0.368	0	Plasma B cells	RABAC1
0	0.470484	0.52	0.038	0	Plasma B cells	SPATS2
0	0.477651	0.615	0.116	0	Plasma B cells	ANKRD28
0	0.479754	0.887	0.514	0	Plasma B cells	PPIB
0	0.486439	0.2	0.005	0	Plasma B cells	ANKRD36BP2
0	0.492628	0.736	0.222	0	Plasma B cells	KDELR1
0	0.494637	0.802	0.354	0	Plasma B cells	SELK
0	0.495543	0.606	0.102	0	Plasma B cells	ELL2
0	0.496617	0.59	0.09	0	Plasma B cells	SLAMF7
0	0.497184	0.703	0.177	0	Plasma B cells	HDLBP
0	0.497219	0.786	0.272	0	Plasma B cells	RPN2
0	0.504124	0.766	0.249	0	Plasma B cells	KDELR2
0	0.505942	0.624	0.1	0	Plasma B cells	SEL1L3
0	0.508719	0.757	0.248	0	Plasma B cells	HM13
0	0.511218	0.489	0.037	0	Plasma B cells	PDK1
0	0.512409	0.643	0.086	0	Plasma B cells	TPD52
0	0.524408	0.844	0.396	0	Plasma B cells	BTG2
0	0.531498	0.543	0.037	0	Plasma B cells	CHPF
0	0.531555	0.905	0.457	0	Plasma B cells	SEC61B
0	0.532579	0.478	0.048	0	Plasma B cells	PLPP5
0	0.533823	0.533	0.113	0	Plasma B cells	HIST1H1C
0	0.569937	0.637	0.099	0	Plasma B cells	TXNDC11
0	0.575042	0.699	0.121	0	Plasma B cells	NUCB2
0	0.575532	0.515	0.02	0	Plasma B cells	SPAG4
0	0.581104	0.848	0.319	0	Plasma B cells	PDIA6
0	0.585077	0.771	0.183	0	Plasma B cells	FAM46C
0	0.603615	0.713	0.122	0	Plasma B cells	TXNDC15
0	0.611528	0.642	0.106	0	Plasma B cells	SELM
0	0.626161	0.882	0.405	0	Plasma B cells	SPCS1
0	0.626495	0.222	0.009	0	Plasma B cells	AL928768.3
0	0.66013	0.66	0.083	0	Plasma B cells	CD38
0	0.660555	0.194	0.01	0	Plasma B cells	DNAAF1
0	0.662262	0.855	0.395	0	Plasma B cells	HSPA5
0	0.668669	0.674	0.105	0	Plasma B cells	SEL1L
0	0.703246	0.747	0.167	0	Plasma B cells	PDIA4
0	0.706284	0.722	0.109	0	Plasma B cells	CRELD2
0	0.727402	0.782	0.166	0	Plasma B cells	DNAJB9
0	0.748573	0.598	0.136	0	Plasma B cells	MYDGF
0	0.761823	0.855	0.247	0	Plasma B cells	SPCS3
0	0.768831	0.635	0.015	0	Plasma B cells	FCRL5
0	0.776455	0.796	0.171	0	Plasma B cells	LMAN1
0	0.782469	0.792	0.144	0	Plasma B cells	ERLEC1
0	0.783638	0.898	0.341	0	Plasma B cells	SPCS2
0	0.800538	0.799	0.18	0	Plasma B cells	MANF
0	0.80572	0.785	0.195	0	Plasma B cells	VIMP
0	0.84598	0.729	0.105	0	Plasma B cells	RRBP1
0	0.861852	0.465	0.017	0	Plasma B cells	JSRP1
0	0.887754	0.812	0.182	0	Plasma B cells	UBE2J1
0	0.897701	0.606	0.006	0	Plasma B cells	SDC1
0	0.939804	0.647	0.04	0	Plasma B cells	POU2AF1
0	0.948306	0.833	0.172	0	Plasma B cells	SDF2L1
0	0.966165	0.821	0.212	0	Plasma B cells	PIM2
0	0.975514	0.62	0.007	0	Plasma B cells	TNFRSF17
0	0.976388	0.902	0.283	0	Plasma B cells	SSR3
0	0.983034	0.852	0.169	0	Plasma B cells	ITM2C
0	1.21824	0.156	0.009	0	Plasma B cells	BLOC1S5.TXNDC5
0	1.22269	0.909	0.214	0	Plasma B cells	FKBP2
0	1.36842	0.891	0.09	0	Plasma B cells	CD79A
0	1.39261	0.918	0.243	0	Plasma B cells	SEC11C
0	1.4366	0.959	0.417	0	Plasma B cells	HSP90B1
0	1.51745	0.888	0.1	0	Plasma B cells	PRDX4
0	1.57623	0.915	0.129	0	Plasma B cells	FKBP11
0	1.64732	0.956	0.435	0	Plasma B cells	HERPUD1
0	1.74029	0.149	0.005	0	Plasma B cells	IGLC7
0	1.95149	0.18	0.016	0	Plasma B cells	IGLC1
0	2.05068	0.302	0.002	0	Plasma B cells	IGLV6.57
0	2.08088	0.959	0.256	0	Plasma B cells	XBP1
0	2.14278	0.976	0.538	0	Plasma B cells	SSR4
0	2.2871	0.907	0.02	0	Plasma B cells	DERL3
0	2.30437	0.14	0.002	0	Plasma B cells	IGKV1.6
0	2.54334	0.143	0.003	0	Plasma B cells	IGKV1.17
0	2.7164	0.342	0.009	0	Plasma B cells	IGKV1.12
0	2.721	0.143	0.004	0	Plasma B cells	IGKV1.16
0	2.7451	0.146	0.004	0	Plasma B cells	IGHV3.7
0	2.76891	0.159	0.006	0	Plasma B cells	IGLV2.8
0	2.88055	0.969	0.051	0	Plasma B cells	MZB1
0	3.25275	0.342	0.049	0	Plasma B cells	IGHM
0	3.28653	0.209	0.017	0	Plasma B cells	IGLV2.14
0	3.29084	0.152	0.007	0	Plasma B cells	IGHV4.39
0	3.4388	0.175	0.006	0	Plasma B cells	IGHV3.21
0	3.45141	0.165	0.007	0	Plasma B cells	IGLV1.40
0	3.50742	0.454	0.008	0	Plasma B cells	IGLV3.1
0	3.74223	0.229	0.008	0	Plasma B cells	IGKV3.15
0	3.74242	0.399	0.023	0	Plasma B cells	IGHA2
0	3.76547	0.241	0.012	0	Plasma B cells	IGHV3.23
0	3.82145	0.267	0.011	0	Plasma B cells	IGKV3.11
0	3.82722	0.192	0.003	0	Plasma B cells	IGKV1.9
0	3.8296	0.576	0.029	0	Plasma B cells	IGHG2
0	3.8538	0.54	0.033	0	Plasma B cells	IGLL5
0	3.94738	0.268	0.038	0	Plasma B cells	IGJ
0	4.09941	0.339	0.01	0	Plasma B cells	IGKV1.5
0	4.27393	0.475	0.038	0	Plasma B cells	IGHGP
0	4.32417	0.395	0.012	0	Plasma B cells	IGKV4.1
0	4.3833	0.292	0.013	0	Plasma B cells	IGLV3.21
0	4.5518	0.563	0.05	0	Plasma B cells	IGLC3
0	4.57672	0.656	0.062	0	Plasma B cells	IGHG4
0	4.68018	0.353	0.017	0	Plasma B cells	IGKV3.20
0	4.68853	0.567	0.033	0	Plasma B cells	JCHAIN
0	4.70012	0.65	0.076	0	Plasma B cells	IGHA1
0	4.80023	0.634	0.072	0	Plasma B cells	IGHG3
0	4.81492	0.676	0.082	0	Plasma B cells	IGHG1
0	4.92228	0.635	0.076	0	Plasma B cells	IGLC2
0	5.21037	0.828	0.183	0	Plasma B cells	IGKC
6.28072e-308	2.92318	0.143	0.005	5.50562e-303	Plasma B cells	IGHV3.30
1.01962e-299	3.25311	0.138	0.004	8.9379e-295	Plasma B cells	IGLV3.19
1.79206e-292	0.634488	0.15	0.01	1.5709e-287	Plasma B cells	AC073610.5
2.9199e-286	2.78052	0.135	0.005	2.55956e-281	Plasma B cells	IGHV4.59
5.03167e-284	2.99477	0.134	0.004	4.41071e-279	Plasma B cells	IGLV1.51
1.39851e-283	3.34942	0.132	0.005	1.22592e-278	Plasma B cells	IGHV1.18
2.20724e-278	0.392517	0.198	0.034	1.93485e-273	Plasma B cells	PPAPDC1B
7.77453e-273	2.31795	0.132	0.005	6.81507e-268	Plasma B cells	IGKV1.39
4.94865e-272	2.78174	0.126	0.002	4.33793e-267	Plasma B cells	IGKV1D.39
7.28814e-267	2.66018	0.121	0.002	6.38871e-262	Plasma B cells	IGHV3.11
1.54827e-263	2.25929	0.128	0.006	1.35719e-258	Plasma B cells	IGHV3.48
8.82544e-263	3.18344	0.126	0.004	7.73629e-258	Plasma B cells	IGLV3.25
3.13722e-260	2.97682	0.131	0.007	2.75005e-255	Plasma B cells	IGLV2.11
4.53067e-250	2.63705	0.12	0.004	3.97154e-245	Plasma B cells	IGHV3.15
1.43017e-248	2.6434	0.116	0.004	1.25367e-243	Plasma B cells	IGKV1.8
1.11827e-245	2.39422	0.115	0.004	9.80265e-241	Plasma B cells	IGHV4.34
1.44539e-244	2.85199	0.114	0.003	1.26701e-239	Plasma B cells	IGLV3.10
5.05044e-234	2.68372	0.12	0.007	4.42717e-229	Plasma B cells	IGLV2.23
3.35664e-230	2.6858	0.106	0.003	2.94239e-225	Plasma B cells	IGHV3.33
1.23171e-229	2.24581	0.106	0.002	1.0797e-224	Plasma B cells	IGKV3D.11
3.36436e-229	1.83195	0.105	0.001	2.94916e-224	Plasma B cells	IGKV1D.8
1.10131e-228	3.65303	0.109	0.004	9.65399e-224	Plasma B cells	IGHV5.51
5.67073e-223	1.7781	0.104	0.002	4.97091e-218	Plasma B cells	IGKV3D.20
1.23691e-221	0.268486	0.66	0.357	1.08426e-216	Plasma B cells	KRTCAP2
1.7071e-221	1.72428	0.105	0.002	1.49642e-216	Plasma B cells	IGKV1.27
7.0656e-221	3.0796	0.108	0.006	6.19363e-216	Plasma B cells	IGHV1.2
6.37071e-218	0.256326	0.862	0.544	5.5845e-213	Plasma B cells	NEAT1
1.67418e-212	3.09532	0.102	0.003	1.46757e-207	Plasma B cells	IGHV4.4
3.3996e-211	2.09546	0.105	0.005	2.98005e-206	Plasma B cells	IGHV1.46
1.33614e-207	3.00024	0.107	0.008	1.17124e-202	Plasma B cells	IGHV1.3
2.14938e-206	3.16815	0.108	0.007	1.88413e-201	Plasma B cells	IGLV1.44
3.21219e-159	0.49711	0.227	0.092	2.81577e-154	Plasma B cells	C19orf10

## Sheet: Naive T cells
p_val	avg_logFC	pct.1	pct.2	p_val_adj	cluster	gene
0	0.329732	0.937	0.835	0	Naive T cells	RPS5
0	0.333102	0.975	0.881	0	Naive T cells	RPL23A
0	0.333349	0.95	0.865	0	Naive T cells	RPL36
0	0.337101	0.928	0.836	0	Naive T cells	RPL6
0	0.341208	0.969	0.887	0	Naive T cells	RPL18
0	0.347595	0.973	0.895	0	Naive T cells	RPS23
0	0.348658	0.941	0.814	0	Naive T cells	RPL38
0	0.352215	0.971	0.878	0	Naive T cells	RPS16
0	0.353047	0.968	0.889	0	Naive T cells	RPL35A
0	0.359827	0.985	0.924	0	Naive T cells	RPL11
0	0.361367	0.961	0.882	0	Naive T cells	RPS13
0	0.361467	0.989	0.932	0	Naive T cells	RPL19
0	0.366142	0.941	0.82	0	Naive T cells	RPL10A
0	0.367487	0.997	0.963	0	Naive T cells	RPLP1
0	0.369923	0.864	0.732	0	Naive T cells	RPL22
0	0.370028	0.995	0.934	0	Naive T cells	RPLP2
0	0.370265	0.984	0.911	0	Naive T cells	RPL10
0	0.376811	0.958	0.866	0	Naive T cells	RPL14
0	0.379209	0.991	0.929	0	Naive T cells	RPS14
0	0.380834	0.992	0.915	0	Naive T cells	RPS29
0	0.391245	0.863	0.7	0	Naive T cells	EEF2
0	0.391589	0.989	0.919	0	Naive T cells	RPS8
0	0.392152	0.958	0.866	0	Naive T cells	RPS21
0	0.400278	0.983	0.911	0	Naive T cells	RPL37
0	0.405999	0.985	0.922	0	Naive T cells	RPL32
0	0.409619	0.936	0.83	0	Naive T cells	RPS3A
0	0.412179	0.959	0.845	0	Naive T cells	RPL5
0	0.412487	0.906	0.792	0	Naive T cells	RPL9
0	0.414317	0.989	0.925	0	Naive T cells	RPS27A
0	0.419841	0.985	0.916	0	Naive T cells	RPS3
0	0.419994	0.98	0.885	0	Naive T cells	RPS25
0	0.420891	0.986	0.91	0	Naive T cells	RPS6
0	0.421712	0.984	0.911	0	Naive T cells	RPS4X
0	0.4267	0.991	0.925	0	Naive T cells	RPL30
0	0.42832	0.945	0.836	0	Naive T cells	RPLP0
0	0.428543	0.934	0.788	0	Naive T cells	RPSA
0	0.441976	0.989	0.922	0	Naive T cells	RPL34
0	0.443646	0.996	0.949	0	Naive T cells	RPL13
0	0.446974	0.882	0.703	0	Naive T cells	EEF1B2
0	0.449726	0.934	0.771	0	Naive T cells	RPL4
0	0.457104	0.995	0.945	0	Naive T cells	RPS12
0	0.462604	0.993	0.927	0	Naive T cells	RPS18
0	0.487497	0.958	0.85	0	Naive T cells	RPL3
0	0.491997	0.338	0.111	0	Naive T cells	FLT3LG
0	0.495571	0.997	0.944	0	Naive T cells	TPT1
0	0.510906	0.557	0.278	0	Naive T cells	GIMAP7
0	0.527753	0.888	0.741	0	Naive T cells	PABPC1
0	0.540268	0.864	0.653	0	Naive T cells	ZFP36L2
0	0.542707	0.26	0.06	0	Naive T cells	LEF1
0	0.553141	0.928	0.843	0	Naive T cells	EEF1A1
0	0.56024	0.377	0.142	0	Naive T cells	CCR7
0	0.565184	0.314	0.104	0	Naive T cells	AQP3
0	0.584541	0.74	0.47	0	Naive T cells	LDHB
0	0.596895	0.295	0.065	0	Naive T cells	CD40LG
0	0.67268	0.35	0.101	0	Naive T cells	TCF7
0	0.745883	0.744	0.346	0	Naive T cells	LTB
0	1.2137	0.887	0.345	0	Naive T cells	IL7R
2.25588e-289	0.274381	0.986	0.938	1.97748e-284	Naive T cells	RPS19
1.52858e-288	0.277143	0.991	0.941	1.33993e-283	Naive T cells	RPL28
4.13806e-287	0.314957	0.945	0.829	3.62738e-282	Naive T cells	RPL27
4.47063e-287	0.390127	0.635	0.342	3.91891e-282	Naive T cells	SPOCK2
4.83177e-283	0.434965	0.503	0.266	4.23548e-278	Naive T cells	PIK3IP1
1.61229e-282	0.487147	0.638	0.394	1.41332e-277	Naive T cells	ANXA1
9.81328e-281	0.448564	0.375	0.158	8.60223e-276	Naive T cells	CAMK4
8.09883e-280	0.292182	0.982	0.916	7.09935e-275	Naive T cells	RPS15A
1.887e-274	0.345677	0.837	0.669	1.65412e-269	Naive T cells	TOMM7
4.14792e-274	0.392206	0.641	0.408	3.63603e-269	Naive T cells	LEPROTL1
1.17463e-269	0.317437	0.983	0.909	1.02967e-264	Naive T cells	RPS27
3.88621e-265	0.269701	0.958	0.88	3.40661e-260	Naive T cells	RPS7
7.45462e-263	0.294918	0.96	0.871	6.53464e-258	Naive T cells	RPL7A
1.44123e-262	0.327521	0.969	0.874	1.26337e-257	Naive T cells	RPS2
8.75593e-262	0.538762	0.238	0.07	7.67536e-257	Naive T cells	PASK
3.76545e-261	0.401859	0.347	0.13	3.30075e-256	Naive T cells	TC2N
2.3714e-259	0.323881	0.923	0.849	2.07874e-254	Naive T cells	RPL29
2.65397e-258	0.493218	0.254	0.078	2.32645e-253	Naive T cells	S1PR1
1.17701e-257	0.427723	0.676	0.478	1.03176e-252	Naive T cells	GLTSCR2
2.06676e-250	0.255492	0.939	0.847	1.8117e-245	Naive T cells	RPL24
3.17655e-250	0.256124	0.951	0.861	2.78454e-245	Naive T cells	RPL35
7.22797e-250	0.327156	0.92	0.843	6.33596e-245	Naive T cells	RPL18A
6.4192e-248	0.279821	0.918	0.812	5.62701e-243	Naive T cells	NACA
2.52716e-246	0.38761	0.526	0.291	2.21528e-241	Naive T cells	GIMAP4
8.44565e-241	0.261236	0.956	0.888	7.40337e-236	Naive T cells	RPL8
4.21154e-235	0.540701	0.423	0.201	3.6918e-230	Naive T cells	KLRB1
2.44403e-231	0.400281	0.402	0.197	2.14241e-226	Naive T cells	RORA
9.32296e-230	0.38534	0.45	0.227	8.17241e-225	Naive T cells	CD6
7.95596e-227	0.424662	0.22	0.059	6.97412e-222	Naive T cells	MAL
1.12338e-225	0.523975	0.748	0.565	9.84745e-221	Naive T cells	TXNIP
3.68432e-223	0.407716	0.254	0.088	3.22964e-218	Naive T cells	THEM4
4.57352e-223	0.259198	0.965	0.869	4.0091e-218	Naive T cells	RPL37A
6.71049e-221	0.386477	0.463	0.25	5.88235e-216	Naive T cells	PBXIP1
8.09995e-219	0.53163	0.677	0.546	7.10034e-214	Naive T cells	SARAF
3.33054e-218	0.250563	0.96	0.891	2.91952e-213	Naive T cells	RPL12
1.07645e-213	0.389188	0.289	0.111	9.43603e-209	Naive T cells	TNFRSF25
7.42076e-206	0.356246	0.371	0.172	6.50496e-201	Naive T cells	TRAT1
2.76686e-203	0.258347	0.933	0.813	2.4254e-198	Naive T cells	BTG1
8.37286e-190	0.332377	0.825	0.676	7.33956e-185	Naive T cells	TSC22D3
1.78275e-186	0.284226	0.819	0.747	1.56274e-181	Naive T cells	GNB2L1
4.49547e-186	0.3536	0.377	0.19	3.94068e-181	Naive T cells	ITK
3.19854e-183	0.333928	0.934	0.808	2.80381e-178	Naive T cells	RPL31
5.22066e-182	0.389519	0.485	0.301	4.57638e-177	Naive T cells	TMEM123
6.77787e-177	0.310779	0.605	0.411	5.94142e-172	Naive T cells	FYB
1.08569e-176	0.381998	0.299	0.14	9.51706e-172	Naive T cells	GPR171
1.68672e-176	0.382082	0.357	0.172	1.47856e-171	Naive T cells	CD5
1.07197e-174	0.35992	0.517	0.309	9.39682e-170	Naive T cells	ETS1
9.12941e-171	0.269836	0.856	0.687	8.00275e-166	Naive T cells	CXCR4
2.26869e-165	0.383848	0.176	0.052	1.98871e-160	Naive T cells	LDLRAP1
4.36816e-165	0.522996	0.347	0.189	3.82908e-160	Naive T cells	SELL
1.29674e-160	0.427199	0.69	0.595	1.13671e-155	Naive T cells	RPS28
1.35051e-159	0.327796	0.285	0.133	1.18385e-154	Naive T cells	FAM102A
1.78171e-158	0.383522	0.261	0.116	1.56183e-153	Naive T cells	RCAN3
2.37014e-157	0.301554	0.464	0.293	2.07764e-152	Naive T cells	AES
3.42044e-155	0.301752	0.853	0.782	2.99833e-150	Naive T cells	RPL39
5.51361e-154	0.291337	0.325	0.168	4.83318e-149	Naive T cells	TTC39C
7.62509e-153	0.334218	0.34	0.178	6.68408e-148	Naive T cells	TMEM173
1.19635e-149	0.314105	0.395	0.232	1.04871e-144	Naive T cells	ARHGAP15
8.97701e-149	0.331324	0.215	0.078	7.86916e-144	Naive T cells	TESPA1
1.75606e-144	0.280449	0.851	0.751	1.53935e-139	Naive T cells	RPL21
3.54757e-142	0.30008	0.636	0.466	3.10976e-137	Naive T cells	CD69
6.84183e-141	0.343419	0.264	0.121	5.99748e-136	Naive T cells	DGKA
1.20713e-140	0.302099	0.623	0.471	1.05816e-135	Naive T cells	EIF3E
1.22548e-140	0.260982	0.115	0.025	1.07425e-135	Naive T cells	CMTM8
1.34351e-140	0.290842	0.927	0.804	1.17771e-135	Naive T cells	RPL13A
1.78176e-140	0.300452	0.33	0.183	1.56188e-135	Naive T cells	RBL2
2.82599e-140	0.457057	0.335	0.176	2.47724e-135	Naive T cells	KLF2
3.49244e-140	0.314379	0.39	0.234	3.06144e-135	Naive T cells	PIM1
3.69535e-140	0.347951	0.273	0.14	3.23931e-135	Naive T cells	TRADD
3.57442e-136	0.305378	0.432	0.264	3.1333e-131	Naive T cells	OCIAD2
2.2463e-134	0.324822	0.252	0.116	1.96908e-129	Naive T cells	ABLIM1
1.0641e-132	0.311867	0.545	0.381	9.32775e-128	Naive T cells	CD48
5.66131e-132	0.309033	0.333	0.182	4.96265e-127	Naive T cells	MGAT4A
6.23779e-131	0.317982	0.18	0.075	5.46799e-126	Naive T cells	SERINC5
1.72632e-130	0.28543	0.425	0.264	1.51328e-125	Naive T cells	TNFAIP8
4.5514e-129	0.259626	0.431	0.272	3.98971e-124	Naive T cells	GPR183
7.05458e-129	0.297583	0.133	0.041	6.18397e-124	Naive T cells	PRKCQ.AS1
1.95935e-128	0.289369	0.517	0.355	1.71755e-123	Naive T cells	PDCD4
1.2064e-127	0.264946	0.424	0.273	1.05752e-122	Naive T cells	EMB
1.96259e-127	0.262469	0.425	0.261	1.72038e-122	Naive T cells	SYNE2
1.24819e-125	0.310051	0.539	0.39	1.09415e-120	Naive T cells	EIF4B
1.58204e-125	0.404022	0.642	0.497	1.3868e-120	Naive T cells	RPS10
1.66886e-125	0.273635	0.429	0.273	1.46291e-120	Naive T cells	TRAC
1.14244e-124	0.275592	0.388	0.234	1.00145e-119	Naive T cells	AAK1
3.62611e-123	0.25228	0.259	0.126	3.17861e-118	Naive T cells	CD28
2.9539e-121	0.288417	0.188	0.078	2.58936e-116	Naive T cells	CCR6
4.55877e-121	0.266787	0.316	0.166	3.99617e-116	Naive T cells	FAM65B
2.67463e-120	0.265506	0.117	0.031	2.34455e-115	Naive T cells	DPP4
4.62232e-119	0.298011	0.267	0.133	4.05188e-114	Naive T cells	BCL11B
3.4355e-118	0.37067	0.356	0.215	3.01153e-113	Naive T cells	NOSIP
1.37032e-117	0.33233	0.176	0.065	1.20121e-112	Naive T cells	PTGER2
1.89155e-117	0.325148	0.247	0.121	1.65812e-112	Naive T cells	SORL1
3.81879e-117	0.258875	0.621	0.48	3.34752e-112	Naive T cells	EIF3F
2.10693e-115	0.329027	0.714	0.601	1.84691e-110	Naive T cells	RPL36A
1.20045e-114	0.253397	0.819	0.678	1.05231e-109	Naive T cells	RPL7
4.56116e-114	0.297198	0.376	0.238	3.99827e-109	Naive T cells	FOXP1
8.01758e-114	0.30502	0.706	0.563	7.02813e-109	Naive T cells	RPL17
1.12899e-113	0.286161	0.647	0.488	9.89657e-109	Naive T cells	TNFAIP3
3.18513e-113	0.269345	0.937	0.825	2.79205e-108	Naive T cells	RPL27A
5.21449e-112	0.256406	0.482	0.332	4.57097e-107	Naive T cells	ABRACL
6.91071e-109	0.265961	0.267	0.146	6.05786e-104	Naive T cells	EPB41
1.17041e-105	0.34708	0.242	0.121	1.02597e-100	Naive T cells	ERN1
8.34918e-105	0.302849	0.781	0.691	7.3188e-100	Naive T cells	JUNB
4.21139e-104	0.265637	0.458	0.318	3.69166e-99	Naive T cells	EML4
4.93294e-104	0.30761	0.257	0.134	4.32417e-99	Naive T cells	ICAM2
5.10613e-104	0.276679	0.195	0.087	4.47598e-99	Naive T cells	RASGRP2
3.24213e-103	0.257228	0.302	0.178	2.84202e-98	Naive T cells	CCDC109B
1.73351e-101	0.262989	0.14	0.052	1.51958e-96	Naive T cells	SH3YL1
3.19974e-100	0.38245	0.309	0.185	2.80486e-95	Naive T cells	TOB1
4.33557e-94	0.299631	0.792	0.699	3.80052e-89	Naive T cells	RPS20
1.22504e-88	0.355696	0.799	0.715	1.07386e-83	Naive T cells	RPS26
6.19992e-87	0.277439	0.457	0.335	5.43479e-82	Naive T cells	AHNAK
6.20178e-80	0.2691	0.33	0.21	5.43642e-75	Naive T cells	PTGER4
1.03248e-78	0.537269	0.133	0.06	9.05062e-74	Naive T cells	CTD.3035D6.1
6.92014e-78	0.263892	0.349	0.236	6.06613e-73	Naive T cells	CDKN1B
1.01529e-77	0.269622	0.205	0.111	8.89992e-73	Naive T cells	KDSR
1.20678e-76	0.293566	0.247	0.141	1.05786e-71	Naive T cells	SATB1
1.09693e-73	0.333185	0.298	0.183	9.61557e-69	Naive T cells	GAS5
3.47866e-72	0.309284	0.15	0.075	3.04936e-67	Naive T cells	SESN1
9.86654e-63	0.353371	0.622	0.552	8.64891e-58	Naive T cells	FOS
1.09315e-62	0.255357	0.246	0.151	9.5824e-58	Naive T cells	AIM1
1.67576e-61	0.300525	0.201	0.117	1.46896e-56	Naive T cells	SESN3
3.01093e-55	0.340105	0.268	0.185	2.63936e-50	Naive T cells	RPL13AP5
8.01492e-52	0.2752	0.159	0.092	7.0258e-47	Naive T cells	RP11.475C16.1
9.51999e-51	0.425143	0.235	0.157	8.34513e-46	Naive T cells	RP11.425L10.1
1.23923e-50	0.286827	0.135	0.074	1.0863e-45	Naive T cells	RPS23P8
2.84984e-49	0.283057	0.124	0.065	2.49814e-44	Naive T cells	RPL34P18
1.21247e-47	0.311207	0.415	0.326	1.06284e-42	Naive T cells	EEF1G
6.10444e-46	0.330395	0.418	0.335	5.35109e-41	Naive T cells	MT.ATP8
7.31017e-46	0.374173	0.234	0.16	6.40802e-41	Naive T cells	RPL3P4
2.10118e-43	0.420359	0.235	0.164	1.84187e-38	Naive T cells	RP11.234A1.1
1.25435e-41	0.333139	0.185	0.118	1.09955e-36	Naive T cells	AC004453.8
2.86286e-40	0.333172	0.194	0.124	2.50955e-35	Naive T cells	RP11.864N7.2
2.69466e-38	0.295083	0.208	0.143	2.36211e-33	Naive T cells	RPL18AP3
2.7336e-38	0.330955	0.229	0.161	2.39625e-33	Naive T cells	RPL13P12
2.83178e-35	0.353494	0.337	0.272	2.48231e-30	Naive T cells	AC090498.1
5.60335e-35	0.407247	0.167	0.107	4.91184e-30	Naive T cells	CTC.575D19.1
4.3738e-32	0.265966	0.398	0.332	3.83403e-27	Naive T cells	NBEAL1
1.19763e-28	0.299388	0.129	0.079	1.04983e-23	Naive T cells	RP11.832N8.1
1.8804e-27	0.357928	0.166	0.113	1.64834e-22	Naive T cells	RP11.51O6.1
1.32832e-25	0.288246	0.438	0.391	1.16439e-20	Naive T cells	MT.ND4L
2.93327e-14	0.351262	0.175	0.136	2.57127e-09	Naive T cells	RP11.543P15.1
1.63401e-12	0.251234	0.111	0.077	1.43236e-07	Naive T cells	RPL39P3

## Sheet: Regulatory T cells
p_val	avg_logFC	pct.1	pct.2	p_val_adj	cluster	gene
0	0.378232	1	0.983	0	Regulatory T cells	B2M
0	0.438369	0.804	0.477	0	Regulatory T cells	CD3D
0	0.451233	0.796	0.481	0	Regulatory T cells	CD3E
0	0.451991	0.543	0.27	0	Regulatory T cells	CD247
0	0.459637	0.142	0.005	0	Regulatory T cells	FANK1
0	0.460795	0.991	0.938	0	Regulatory T cells	HLA.A
0	0.463356	0.431	0.189	0	Regulatory T cells	SKAP1
0	0.497832	0.163	0.005	0	Regulatory T cells	CCR8
0	0.521521	0.329	0.114	0	Regulatory T cells	SIRPG
0	0.526612	0.295	0.089	0	Regulatory T cells	DUSP16
0	0.532046	0.769	0.5	0	Regulatory T cells	RGS1
0	0.533286	0.491	0.234	0	Regulatory T cells	LAT
0	0.549055	0.768	0.528	0	Regulatory T cells	IL2RG
0	0.559421	0.412	0.172	0	Regulatory T cells	TMEM173
0	0.581249	0.394	0.151	0	Regulatory T cells	MAF
0	0.586613	0.805	0.46	0	Regulatory T cells	CD2
0	0.586863	0.605	0.346	0	Regulatory T cells	BIRC3
0	0.610465	0.424	0.186	0	Regulatory T cells	RHBDD2
0	0.614792	0.352	0.12	0	Regulatory T cells	FAS
0	0.617526	0.268	0.07	0	Regulatory T cells	TNFRSF9
0	0.619035	0.207	0.025	0	Regulatory T cells	IL1R2
0	0.621511	0.885	0.652	0	Regulatory T cells	S100A4
0	0.621935	0.382	0.116	0	Regulatory T cells	CD28
0	0.638802	0.5	0.234	0	Regulatory T cells	GBP2
0	0.655512	0.479	0.2	0	Regulatory T cells	GBP5
0	0.665916	0.758	0.524	0	Regulatory T cells	SOD1
0	0.677548	0.217	0.041	0	Regulatory T cells	AC133644.2
0	0.697256	0.581	0.269	0	Regulatory T cells	DUSP4
0	0.700027	0.549	0.256	0	Regulatory T cells	ARID5B
0	0.706698	0.34	0.082	0	Regulatory T cells	STAM
0	0.714675	0.56	0.241	0	Regulatory T cells	PBXIP1
0	0.727336	0.304	0.044	0	Regulatory T cells	IKZF2
0	0.747785	0.467	0.21	0	Regulatory T cells	UGP2
0	0.763957	0.58	0.316	0	Regulatory T cells	TNFRSF1B
0	0.769142	0.496	0.223	0	Regulatory T cells	CORO1B
0	0.772677	0.761	0.418	0	Regulatory T cells	CD7
0	0.776484	0.335	0.115	0	Regulatory T cells	GK
0	0.779129	0.233	0.03	0	Regulatory T cells	ICA1
0	0.795883	0.731	0.333	0	Regulatory T cells	SPOCK2
0	0.802975	0.48	0.201	0	Regulatory T cells	PMAIP1
0	0.809745	0.518	0.211	0	Regulatory T cells	PIM2
0	0.810302	0.25	0.032	0	Regulatory T cells	LAIR2
0	0.810423	0.485	0.195	0	Regulatory T cells	DNPH1
0	0.813267	0.376	0.149	0	Regulatory T cells	HTATIP2
0	0.83498	0.633	0.249	0	Regulatory T cells	CD27
0	0.847307	0.307	0.041	0	Regulatory T cells	LAYN
0	0.940485	0.305	0.061	0	Regulatory T cells	MAGEH1
0	1.01287	0.498	0.127	0	Regulatory T cells	ICOS
0	1.01642	0.326	0.023	0	Regulatory T cells	RTKN2
0	1.03594	0.631	0.273	0	Regulatory T cells	CARD16
0	1.08809	0.552	0.124	0	Regulatory T cells	CTLA4
0	1.12909	0.772	0.342	0	Regulatory T cells	LTB
0	1.1508	0.485	0.076	0	Regulatory T cells	TBC1D4
0	1.15779	0.688	0.218	0	Regulatory T cells	TIGIT
0	1.21096	0.943	0.57	0	Regulatory T cells	IL32
0	1.24098	0.39	0.051	0	Regulatory T cells	IL2RA
0	1.42072	0.714	0.212	0	Regulatory T cells	BATF
0	1.42664	0.612	0.145	0	Regulatory T cells	TNFRSF18
0	1.71482	0.556	0.025	0	Regulatory T cells	FOXP3
0	1.78836	0.604	0.115	0	Regulatory T cells	TNFRSF4
4.3965e-307	0.663133	0.498	0.261	3.85393e-302	Regulatory T cells	LINC00152
4.98079e-306	0.412431	0.608	0.342	4.36611e-301	Regulatory T cells	LCK
1.05267e-303	0.490527	0.176	0.02	9.22759e-299	Regulatory T cells	F5
2.89194e-301	0.493489	0.185	0.026	2.53504e-296	Regulatory T cells	AC017002.1
4.51557e-300	0.628798	0.57	0.355	3.95831e-295	Regulatory T cells	CTSC
5.47295e-298	0.593996	0.423	0.187	4.79754e-293	Regulatory T cells	PHLDA1
1.29154e-288	0.476811	0.395	0.172	1.13215e-283	Regulatory T cells	CD4
3.92425e-288	0.648768	0.261	0.075	3.43996e-283	Regulatory T cells	GADD45A
2.03451e-287	0.678249	0.503	0.266	1.78343e-282	Regulatory T cells	TRAC
2.88067e-283	0.470183	0.172	0.024	2.52517e-278	Regulatory T cells	IKZF4
4.82603e-276	0.488581	0.241	0.064	4.23045e-271	Regulatory T cells	ZC3H12D
2.94253e-275	0.445667	0.445	0.211	2.57939e-270	Regulatory T cells	IL2RB
7.14005e-270	0.553021	0.377	0.175	6.2589e-265	Regulatory T cells	BTG3
1.83333e-267	0.398146	0.749	0.59	1.60708e-262	Regulatory T cells	SUMO2
2.08391e-258	0.542526	0.287	0.097	1.82674e-253	Regulatory T cells	SLAMF1
2.62955e-256	0.666494	0.251	0.084	2.30504e-251	Regulatory T cells	MIR4435.2HG
4.91418e-254	0.431633	0.382	0.169	4.30772e-249	Regulatory T cells	CD5
1.48084e-252	0.464441	0.39	0.178	1.29809e-247	Regulatory T cells	HNRNPLL
3.56309e-248	0.401815	0.754	0.599	3.12337e-243	Regulatory T cells	YWHAB
5.71906e-247	0.423727	0.664	0.48	5.01327e-242	Regulatory T cells	ARL6IP5
1.90811e-243	0.451803	0.329	0.134	1.67263e-238	Regulatory T cells	GATA3
1.89591e-241	0.269257	0.753	0.568	1.66194e-236	Regulatory T cells	SAT1
4.71539e-239	0.490027	0.351	0.147	4.13346e-234	Regulatory T cells	CXCR6
4.46921e-237	0.635955	0.543	0.347	3.91766e-232	Regulatory T cells	CACYBP
9.6508e-236	0.498255	0.558	0.364	8.45979e-231	Regulatory T cells	UCP2
6.29775e-235	0.437467	0.296	0.11	5.52054e-230	Regulatory T cells	TNFRSF25
4.47597e-233	0.458189	0.473	0.243	3.92359e-228	Regulatory T cells	SH2D2A
1.04795e-231	0.422625	0.281	0.104	9.18619e-227	Regulatory T cells	TNIK
7.76e-231	0.399933	0.194	0.048	6.80234e-226	Regulatory T cells	HS3ST3B1
1.99392e-228	0.414052	0.604	0.418	1.74785e-223	Regulatory T cells	JAK1
4.08042e-228	0.524544	0.552	0.377	3.57686e-223	Regulatory T cells	RPS27L
2.37325e-226	0.396108	0.902	0.798	2.08037e-221	Regulatory T cells	UBC
2.56508e-226	0.317115	0.473	0.267	2.24853e-221	Regulatory T cells	PIK3IP1
4.85406e-226	0.408297	0.177	0.038	4.25502e-221	Regulatory T cells	FBLN7
5.506e-225	0.40212	0.161	0.03	4.8265e-220	Regulatory T cells	CUL9
2.49033e-223	0.451842	0.441	0.254	2.183e-218	Regulatory T cells	PPM1G
1.81546e-222	0.3235	0.945	0.844	1.59142e-217	Regulatory T cells	GAPDH
8.11091e-222	0.368509	0.211	0.064	7.10994e-217	Regulatory T cells	TSPAN5
1.46869e-219	0.342294	0.131	0.018	1.28744e-214	Regulatory T cells	IL12RB2
5.28862e-218	0.431213	0.17	0.037	4.63595e-213	Regulatory T cells	ETV7
2.14192e-216	0.480191	0.272	0.104	1.87758e-211	Regulatory T cells	PHTF2
6.43971e-216	0.419868	0.47	0.293	5.64499e-211	Regulatory T cells	MAT2B
5.05403e-212	0.384233	0.103	0.004	4.43031e-207	Regulatory T cells	GNG8
3.53656e-208	0.378675	0.395	0.196	3.10011e-203	Regulatory T cells	RORA
3.16548e-207	0.442406	0.392	0.185	2.77483e-202	Regulatory T cells	SELL
3.33986e-205	0.438329	0.453	0.26	2.92769e-200	Regulatory T cells	PRDX2
2.56762e-204	0.351514	0.545	0.36	2.25075e-199	Regulatory T cells	CALM3
1.43321e-202	0.39386	0.172	0.044	1.25634e-197	Regulatory T cells	FAAH2
1.39401e-201	0.466333	0.26	0.1	1.22198e-196	Regulatory T cells	IL21R
3.53735e-200	0.278216	0.978	0.929	3.10081e-195	Regulatory T cells	HLA.C
5.22338e-200	0.452863	0.223	0.074	4.57876e-195	Regulatory T cells	CCR6
2.8161e-198	0.493258	0.346	0.185	2.46857e-193	Regulatory T cells	GRSF1
4.75366e-195	0.477959	0.39	0.225	4.16701e-190	Regulatory T cells	GLRX
3.74495e-191	0.355847	0.128	0.021	3.28278e-186	Regulatory T cells	IL1R1
4.23905e-190	0.408947	0.201	0.061	3.71591e-185	Regulatory T cells	MAST4
1.53223e-189	0.328059	0.129	0.02	1.34314e-184	Regulatory T cells	ADTRP
3.16591e-188	0.461843	0.639	0.479	2.7752e-183	Regulatory T cells	PKM
5.90547e-188	0.393701	0.411	0.248	5.17668e-183	Regulatory T cells	TNIP1
3.02038e-187	0.426839	0.298	0.133	2.64763e-182	Regulatory T cells	TRAF1
9.95983e-186	0.355316	0.419	0.245	8.73069e-181	Regulatory T cells	OPTN
3.11433e-185	0.349764	0.85	0.726	2.72999e-180	Regulatory T cells	HSPA8
3.31896e-185	0.381744	0.489	0.314	2.90937e-180	Regulatory T cells	NDFIP1
5.02571e-184	0.418183	0.23	0.089	4.40548e-179	Regulatory T cells	PHACTR2
7.49336e-183	0.370777	0.526	0.326	6.5686e-178	Regulatory T cells	RHOH
9.10041e-183	0.386822	0.221	0.077	7.97733e-178	Regulatory T cells	HOXB2
2.54353e-182	0.390338	0.238	0.089	2.22963e-177	Regulatory T cells	THEM4
4.24519e-182	0.386647	0.326	0.161	3.72129e-177	Regulatory T cells	GALM
2.00234e-181	0.372962	0.29	0.13	1.75523e-176	Regulatory T cells	PCED1B
1.32637e-180	0.422764	0.318	0.149	1.16268e-175	Regulatory T cells	P2RY10
3.10515e-177	0.383525	0.616	0.444	2.72195e-172	Regulatory T cells	STK17B
3.53041e-177	0.378439	0.149	0.037	3.09473e-172	Regulatory T cells	CRADD
9.60653e-177	0.383479	0.29	0.131	8.42099e-172	Regulatory T cells	PTTG1
3.82069e-176	0.422037	0.317	0.158	3.34918e-171	Regulatory T cells	SNX9
5.25279e-176	0.326257	0.717	0.563	4.60454e-171	Regulatory T cells	CIRBP
2.1188e-175	0.632702	0.113	0.014	1.85732e-170	Regulatory T cells	LOC101928173
1.62118e-173	0.350322	0.527	0.369	1.42111e-168	Regulatory T cells	CUTA
2.53337e-171	0.252123	0.869	0.754	2.22072e-166	Regulatory T cells	ARHGDIB
9.53625e-171	0.438197	0.685	0.545	8.35938e-166	Regulatory T cells	SARAF
2.31018e-170	0.269391	0.887	0.776	2.02508e-165	Regulatory T cells	MYL6
3.15699e-170	0.397272	0.322	0.163	2.76739e-165	Regulatory T cells	TLK1
3.86806e-170	0.396422	0.513	0.356	3.3907e-165	Regulatory T cells	C9orf16
2.98364e-169	0.345346	0.222	0.086	2.61543e-164	Regulatory T cells	UXS1
5.06191e-168	0.666094	0.207	0.073	4.43722e-163	Regulatory T cells	MIR4435.1HG
1.2391e-167	0.385624	0.159	0.048	1.08618e-162	Regulatory T cells	CHST7
4.75011e-167	0.398519	0.352	0.19	4.1639e-162	Regulatory T cells	ZBTB38
1.10784e-166	0.431093	0.284	0.13	9.71125e-162	Regulatory T cells	PELI1
5.32115e-166	0.388938	0.424	0.245	4.66447e-161	Regulatory T cells	PRDM1
6.22037e-166	0.350128	0.158	0.04	5.45272e-161	Regulatory T cells	CCR4
1.56974e-164	0.291354	0.115	0.019	1.37602e-159	Regulatory T cells	EPHX2
9.38323e-162	0.304503	0.661	0.503	8.22525e-157	Regulatory T cells	CYTIP
9.6076e-160	0.425294	0.359	0.212	8.42193e-155	Regulatory T cells	CMTM7
2.44948e-159	0.406666	0.512	0.327	2.14719e-154	Regulatory T cells	TRBC2
3.53513e-159	0.313344	0.18	0.059	3.09886e-154	Regulatory T cells	TRIB2
1.26825e-158	0.376693	0.359	0.194	1.11173e-153	Regulatory T cells	CASP1
5.18627e-158	0.377126	0.132	0.032	4.54624e-153	Regulatory T cells	LTA
1.06637e-157	0.3307	0.668	0.521	9.34773e-153	Regulatory T cells	ENO1
1.30126e-155	0.256382	0.121	0.028	1.14067e-150	Regulatory T cells	ADAT2
1.05178e-154	0.43524	0.536	0.358	9.2198e-150	Regulatory T cells	CREM
2.60178e-154	0.327129	0.579	0.42	2.28069e-149	Regulatory T cells	FKBP1A
4.86123e-154	0.358992	0.405	0.259	4.26131e-149	Regulatory T cells	SDF4
1.18665e-153	0.40068	0.474	0.319	1.04021e-148	Regulatory T cells	NDUFV2
3.51004e-153	0.36599	0.337	0.186	3.07687e-148	Regulatory T cells	FAM129A
5.37619e-153	0.340573	0.54	0.387	4.71272e-148	Regulatory T cells	ISCU
1.16672e-151	0.315795	0.613	0.462	1.02273e-146	Regulatory T cells	PARK7
2.38795e-151	0.42052	0.455	0.297	2.09325e-146	Regulatory T cells	MRPS6
2.85592e-150	0.357091	0.525	0.368	2.50347e-145	Regulatory T cells	RHOG
5.81422e-150	0.397568	0.277	0.139	5.09669e-145	Regulatory T cells	NCF4
6.55155e-150	0.286149	0.675	0.525	5.74302e-145	Regulatory T cells	RAC2
1.70818e-149	0.357041	0.392	0.247	1.49737e-144	Regulatory T cells	USP15
2.26735e-149	0.349823	0.571	0.402	1.98754e-144	Regulatory T cells	C12orf57
2.98456e-148	0.358514	0.53	0.374	2.61624e-143	Regulatory T cells	PPP1R2
2.63751e-147	0.417306	0.185	0.061	2.31201e-142	Regulatory T cells	MAL
3.1801e-147	0.31326	0.221	0.091	2.78765e-142	Regulatory T cells	PBX4
4.92059e-147	0.300289	0.481	0.316	4.31334e-142	Regulatory T cells	ICAM3
3.36791e-146	0.440316	0.512	0.36	2.95227e-141	Regulatory T cells	UBE2B
8.74709e-146	0.301476	0.27	0.129	7.66761e-141	Regulatory T cells	RASGRP1
7.12901e-145	0.417138	0.293	0.147	6.24922e-140	Regulatory T cells	ENTPD1
1.20162e-144	0.374405	0.136	0.041	1.05332e-139	Regulatory T cells	NGFRAP1
3.25771e-144	0.32185	0.16	0.053	2.85568e-139	Regulatory T cells	HAPLN3
5.30296e-144	0.292509	0.363	0.19	4.64853e-139	Regulatory T cells	ITK
7.03514e-143	0.319508	0.541	0.385	6.16694e-138	Regulatory T cells	DDX24
1.80388e-142	0.326381	0.31	0.155	1.58126e-137	Regulatory T cells	SIT1
2.58793e-142	0.336661	0.607	0.438	2.26855e-137	Regulatory T cells	ISG20
4.46224e-142	0.343335	0.215	0.091	3.91156e-137	Regulatory T cells	TRAF3
1.73967e-141	0.292359	0.416	0.261	1.52498e-136	Regulatory T cells	SYNE2
2.67568e-141	0.320662	0.18	0.066	2.34548e-136	Regulatory T cells	LEF1
3.9492e-141	0.271018	0.671	0.514	3.46183e-136	Regulatory T cells	ARPC1B
8.74894e-141	0.326587	0.214	0.099	7.66923e-136	Regulatory T cells	OAS1
2.8799e-140	0.317878	0.417	0.269	2.52449e-135	Regulatory T cells	APBB1IP
1.93724e-139	0.310174	0.42	0.252	1.69817e-134	Regulatory T cells	LBH
3.42409e-139	0.2534	0.9	0.786	3.00152e-134	Regulatory T cells	SRGN
1.63828e-137	0.349118	0.195	0.076	1.4361e-132	Regulatory T cells	MAP1LC3A
2.24825e-136	0.386732	0.301	0.166	1.97079e-131	Regulatory T cells	IGFLR1
2.76136e-135	0.31759	0.839	0.711	2.42058e-130	Regulatory T cells	RPS26
4.63242e-135	0.330422	0.182	0.07	4.06073e-130	Regulatory T cells	LIMA1
9.45289e-135	0.352668	0.533	0.397	8.28631e-130	Regulatory T cells	PAIP2
9.50045e-135	0.341815	0.315	0.168	8.328e-130	Regulatory T cells	TTC39C
2.74128e-134	0.298681	0.485	0.308	2.40298e-129	Regulatory T cells	ITM2A
3.16522e-134	0.306268	0.47	0.308	2.7746e-129	Regulatory T cells	SLA
3.53978e-134	0.278355	0.299	0.172	3.10294e-129	Regulatory T cells	ACP5
2.28623e-133	0.332791	0.269	0.138	2.00409e-128	Regulatory T cells	CCM2
1.11966e-132	0.301717	0.347	0.187	9.81487e-128	Regulatory T cells	SH2D1A
2.17141e-131	0.313779	0.147	0.052	1.90344e-126	Regulatory T cells	CCNG2
8.61565e-131	0.260358	0.699	0.562	7.55239e-126	Regulatory T cells	SKP1
2.92729e-130	0.33481	0.475	0.328	2.56604e-125	Regulatory T cells	RAP1A
4.86347e-130	0.32127	0.434	0.296	4.26327e-125	Regulatory T cells	IL10RA
7.32373e-130	0.342589	0.262	0.137	6.41991e-125	Regulatory T cells	RAB11FIP1
1.01135e-129	0.37739	0.328	0.193	8.86536e-125	Regulatory T cells	ANKRD10
1.03884e-129	0.299499	0.143	0.043	9.1064e-125	Regulatory T cells	GCNT1
1.05362e-129	0.318004	0.471	0.315	9.23589e-125	Regulatory T cells	SEPT6
7.04948e-129	0.305191	0.47	0.309	6.17951e-124	Regulatory T cells	CLEC2D
1.44473e-128	0.283071	0.563	0.422	1.26644e-123	Regulatory T cells	UBE2D2
1.82887e-128	0.38734	0.186	0.072	1.60317e-123	Regulatory T cells	METTL8
2.34347e-128	0.288781	0.524	0.38	2.05426e-123	Regulatory T cells	RNF213
4.51841e-127	0.364577	0.212	0.096	3.9608e-122	Regulatory T cells	SPATS2L
6.17572e-127	0.350395	0.297	0.168	5.41357e-122	Regulatory T cells	IFNAR2
1.76477e-126	0.361475	0.389	0.248	1.54698e-121	Regulatory T cells	TANK
2.4174e-126	0.311272	0.22	0.096	2.11907e-121	Regulatory T cells	CNST
1.70851e-124	0.328423	0.46	0.313	1.49766e-119	Regulatory T cells	PAK2
3.82434e-124	0.341625	0.406	0.267	3.35237e-119	Regulatory T cells	NOP58
5.6242e-124	0.265174	0.156	0.054	4.93012e-119	Regulatory T cells	FCRL3
2.53727e-122	0.30104	0.146	0.05	2.22414e-117	Regulatory T cells	ZNRF1
9.31264e-121	0.274587	0.586	0.451	8.16337e-116	Regulatory T cells	ANAPC16
5.3635e-120	0.412267	0.557	0.428	4.70159e-115	Regulatory T cells	SQSTM1
8.09666e-120	0.32899	0.314	0.185	7.09745e-115	Regulatory T cells	RNF145
1.31752e-119	0.285282	0.675	0.541	1.15493e-114	Regulatory T cells	SRSF7
1.54492e-119	0.32057	0.224	0.108	1.35426e-114	Regulatory T cells	ZC3H7A
5.10367e-119	0.311633	0.463	0.327	4.47382e-114	Regulatory T cells	DYNLRB1
1.94139e-118	0.293924	0.18	0.072	1.7018e-113	Regulatory T cells	NDFIP2
2.31863e-118	0.278976	0.226	0.112	2.03249e-113	Regulatory T cells	MSI2
2.49875e-118	0.333933	0.507	0.376	2.19038e-113	Regulatory T cells	PGAM1
3.98591e-118	0.331402	0.445	0.305	3.49401e-113	Regulatory T cells	STAT3
2.5914e-117	0.279243	0.158	0.063	2.2716e-112	Regulatory T cells	AKIP1
1.67595e-116	0.356401	0.161	0.063	1.46912e-111	Regulatory T cells	THADA
3.27357e-116	0.34697	0.355	0.219	2.86957e-111	Regulatory T cells	CCND2
1.93106e-115	0.315785	0.298	0.167	1.69274e-110	Regulatory T cells	CXCR3
2.37125e-115	0.313716	0.115	0.032	2.07861e-110	Regulatory T cells	ZC2HC1A
2.99924e-115	0.323365	0.114	0.035	2.6291e-110	Regulatory T cells	PTP4A3
9.7122e-115	0.29361	0.374	0.223	8.51362e-110	Regulatory T cells	CD82
1.64006e-114	0.330899	0.117	0.033	1.43766e-109	Regulatory T cells	HPGD
3.22652e-114	0.273832	0.141	0.045	2.82833e-109	Regulatory T cells	PKIA
3.4801e-114	0.301336	0.444	0.293	3.05062e-109	Regulatory T cells	GNG2
1.03969e-113	0.252199	0.422	0.286	9.11385e-109	Regulatory T cells	SH3KBP1
1.43078e-113	0.337598	0.304	0.172	1.25421e-108	Regulatory T cells	EPSTI1
1.37445e-111	0.329251	0.378	0.244	1.20483e-106	Regulatory T cells	C4orf48
1.90237e-111	0.256587	0.138	0.045	1.6676e-106	Regulatory T cells	IL18R1
1.09521e-110	0.254323	0.613	0.473	9.6005e-106	Regulatory T cells	GMFG
3.26088e-110	0.285219	0.197	0.095	2.85846e-105	Regulatory T cells	MALT1
4.94633e-110	0.256128	0.462	0.316	4.3359e-105	Regulatory T cells	BUB3
1.356e-109	0.282491	0.436	0.307	1.18865e-104	Regulatory T cells	EPC1
4.20913e-109	0.264212	0.469	0.33	3.68968e-104	Regulatory T cells	TERF2IP
1.18901e-108	0.268139	0.414	0.265	1.04227e-103	Regulatory T cells	OCIAD2
4.47605e-107	0.287057	0.494	0.351	3.92366e-102	Regulatory T cells	SAMSN1
1.20846e-105	0.324362	0.27	0.153	1.05933e-100	Regulatory T cells	REXO2
8.03665e-105	0.26928	0.125	0.04	7.04485e-100	Regulatory T cells	TOX2
1.7857e-104	0.276322	0.297	0.183	1.56532e-99	Regulatory T cells	CD58
3.3984e-104	0.300967	0.371	0.236	2.979e-99	Regulatory T cells	DOK2
2.73295e-103	0.314345	0.372	0.234	2.39567e-98	Regulatory T cells	CDKN1B
3.41756e-103	0.261867	0.394	0.249	2.9958e-98	Regulatory T cells	TRAF3IP3
1.23498e-102	0.304397	0.186	0.08	1.08257e-97	Regulatory T cells	C16orf87
2.71876e-102	0.26938	0.231	0.124	2.38324e-97	Regulatory T cells	GCHFR
3.1135e-102	0.404166	0.25	0.136	2.72926e-97	Regulatory T cells	TRBC1
6.07605e-102	0.265104	0.172	0.077	5.3262e-97	Regulatory T cells	FAM110A
8.38298e-102	0.270805	0.15	0.062	7.34844e-97	Regulatory T cells	TIAM1
1.41531e-101	0.286908	0.389	0.258	1.24065e-96	Regulatory T cells	SEC11C
7.82177e-101	0.305254	0.217	0.111	6.85649e-96	Regulatory T cells	AQP3
1.84633e-100	0.292323	0.186	0.095	1.61848e-95	Regulatory T cells	CREB3L2
2.95813e-99	0.357389	0.429	0.296	2.59307e-94	Regulatory T cells	SCAND1
3.09892e-99	0.300011	0.405	0.265	2.71649e-94	Regulatory T cells	ELOVL5
5.63477e-99	0.295035	0.256	0.153	4.93938e-94	Regulatory T cells	IL6ST
1.90577e-97	0.291222	0.382	0.259	1.67058e-92	Regulatory T cells	NDUFC1
1.92414e-97	0.381413	0.347	0.228	1.68668e-92	Regulatory T cells	CNIH1
5.61156e-97	0.439585	0.642	0.488	4.91904e-92	Regulatory T cells	HSPA1A
5.05434e-96	0.273469	0.436	0.317	4.43058e-91	Regulatory T cells	PRKAR1A
9.80447e-96	0.254607	0.179	0.084	8.5945e-91	Regulatory T cells	HDAC7
4.08963e-95	0.307426	0.253	0.138	3.58493e-90	Regulatory T cells	TNIP2
2.15388e-94	0.270616	0.123	0.049	1.88807e-89	Regulatory T cells	SDC4
4.93697e-94	0.263871	0.474	0.35	4.32769e-89	Regulatory T cells	SUMO1
5.91014e-94	0.267418	0.153	0.063	5.18077e-89	Regulatory T cells	ACTA2
6.56881e-94	0.283708	0.345	0.227	5.75815e-89	Regulatory T cells	WHSC1L1
1.05353e-92	0.25947	0.43	0.317	9.23515e-88	Regulatory T cells	VCP
1.68235e-90	0.273404	0.298	0.184	1.47474e-85	Regulatory T cells	ZNF292
2.06817e-90	0.257115	0.142	0.058	1.81294e-85	Regulatory T cells	INPP5F
2.43964e-90	0.289262	0.255	0.147	2.13857e-85	Regulatory T cells	CCDC167
5.04238e-90	0.449774	0.15	0.07	4.4201e-85	Regulatory T cells	SOX4
7.834e-90	0.261019	0.498	0.375	6.8672e-85	Regulatory T cells	NOP10
8.0034e-90	0.309336	0.263	0.158	7.0157e-85	Regulatory T cells	HPRT1
9.46719e-90	0.264102	0.478	0.352	8.29884e-85	Regulatory T cells	ATPIF1
2.66451e-89	0.280843	0.324	0.219	2.33568e-84	Regulatory T cells	GTF3C6
4.35156e-89	0.319524	0.76	0.668	3.81454e-84	Regulatory T cells	HSP90AB1
4.3043e-88	0.281157	0.341	0.221	3.77311e-83	Regulatory T cells	ARPP19
3.47587e-87	0.272773	0.163	0.074	3.04692e-82	Regulatory T cells	FOXO1
2.56479e-86	0.253362	0.203	0.111	2.24827e-81	Regulatory T cells	KDSR
3.62942e-86	0.31993	0.239	0.133	3.18151e-81	Regulatory T cells	MT1E
4.28376e-86	0.256532	0.323	0.205	3.7551e-81	Regulatory T cells	TSPYL2
5.1468e-86	0.266434	0.164	0.077	4.51163e-81	Regulatory T cells	GLCCI1
2.30688e-84	0.304757	0.267	0.161	2.02219e-79	Regulatory T cells	NABP1
2.35913e-83	0.291218	0.526	0.392	2.06799e-78	Regulatory T cells	HSPB1
1.88082e-82	0.250303	0.553	0.435	1.64871e-77	Regulatory T cells	DDIT4
1.10074e-81	0.277731	0.371	0.267	9.64898e-77	Regulatory T cells	TPR
5.00864e-81	0.355654	0.313	0.201	4.39052e-76	Regulatory T cells	PIM3
1.0482e-80	0.254373	0.136	0.06	9.18838e-76	Regulatory T cells	KCNN4
1.54145e-80	0.265541	0.108	0.042	1.35122e-75	Regulatory T cells	VDR
3.28442e-79	0.310827	0.447	0.343	2.87909e-74	Regulatory T cells	SYNGR2
3.75595e-79	0.259243	0.375	0.264	3.29243e-74	Regulatory T cells	G3BP2
5.10614e-78	0.274998	0.162	0.079	4.47599e-73	Regulatory T cells	FRMD4B
1.5113e-76	0.307134	0.134	0.054	1.32479e-71	Regulatory T cells	GEM
1.79336e-76	0.323865	0.687	0.567	1.57204e-71	Regulatory T cells	DNAJB1
5.15688e-75	0.250112	0.124	0.049	4.52047e-70	Regulatory T cells	NINJ2
1.70192e-74	0.39823	0.574	0.47	1.49189e-69	Regulatory T cells	HSPE1
6.38845e-74	0.302357	0.409	0.296	5.60005e-69	Regulatory T cells	COX17
6.87136e-74	0.273676	0.243	0.154	6.02337e-69	Regulatory T cells	ADI1
4.92212e-72	0.254824	0.333	0.227	4.31469e-67	Regulatory T cells	ANXA7
7.50254e-71	0.256682	0.193	0.114	6.57665e-66	Regulatory T cells	TIFA
1.78279e-70	0.252153	0.436	0.326	1.56278e-65	Regulatory T cells	NDUFB1
1.67354e-68	0.286509	0.165	0.083	1.46701e-63	Regulatory T cells	OTUD5
1.60367e-67	0.250944	0.204	0.115	1.40577e-62	Regulatory T cells	TFRC
1.54569e-66	0.253806	0.265	0.172	1.35493e-61	Regulatory T cells	CD59
2.96005e-66	0.295468	0.189	0.1	2.59475e-61	Regulatory T cells	FAIM3
4.48732e-66	0.276073	0.226	0.139	3.93354e-61	Regulatory T cells	PMVK
1.62027e-65	0.26831	0.269	0.172	1.42031e-60	Regulatory T cells	NFKB2
7.09105e-65	0.252799	0.331	0.237	6.21594e-60	Regulatory T cells	ARID5A
2.71018e-63	0.312289	0.193	0.117	2.37571e-58	Regulatory T cells	ID3
3.88957e-62	0.253678	0.208	0.116	3.40956e-57	Regulatory T cells	SESN3
3.51489e-61	0.292339	0.127	0.064	3.08112e-56	Regulatory T cells	CD70
2.96472e-60	0.251506	0.457	0.353	2.59885e-55	Regulatory T cells	NDUFA13
1.87186e-58	0.253964	0.166	0.095	1.64085e-53	Regulatory T cells	BCL2L1
9.54178e-53	0.261319	0.355	0.267	8.36423e-48	Regulatory T cells	BAX
1.39256e-51	0.313994	0.117	0.06	1.2207e-46	Regulatory T cells	NMB
5.15982e-49	0.393188	0.494	0.408	4.52304e-44	Regulatory T cells	HSPD1
4.40978e-31	0.300814	0.479	0.398	3.86556e-26	Regulatory T cells	HSPA1B
8.35243e-26	0.265959	0.119	0.08	7.32166e-21	Regulatory T cells	RP11.347P5.1
4.28534e-23	0.373713	0.181	0.132	3.75649e-18	Regulatory T cells	LOC101929876
2.36379e-17	0.297448	0.245	0.19	2.07208e-12	Regulatory T cells	FKBP4

## Sheet: T helper cells
p_val	avg_logFC	pct.1	pct.2	p_val_adj	cluster	gene
0	0.281773	0.867	0.493	0	T helper cells	CD3E
0	0.305721	0.651	0.368	0	T helper cells	PEBP1
0	0.317256	0.791	0.502	0	T helper cells	HMGN1
0	0.325513	0.838	0.536	0	T helper cells	IL2RG
0	0.332816	0.282	0.07	0	T helper cells	ZC3H12D
0	0.342835	0.369	0.128	0	T helper cells	CD28
0	0.345025	0.238	0.048	0	T helper cells	NPDC1
0	0.345063	0.644	0.35	0	T helper cells	SUMO1
0	0.345119	0.334	0.108	0	T helper cells	RANGAP1
0	0.346844	0.851	0.594	0	T helper cells	SUMO2
0	0.347344	0.834	0.564	0	T helper cells	SKP1
0	0.348313	0.458	0.195	0	T helper cells	RHBDD2
0	0.350214	0.431	0.169	0	T helper cells	PDE4D
0	0.356243	0.347	0.11	0	T helper cells	TNIK
0	0.356956	0.429	0.146	0	T helper cells	ICOS
0	0.361076	0.646	0.31	0	T helper cells	CLEC2D
0	0.36411	0.769	0.463	0	T helper cells	PARK7
0	0.364173	0.59	0.304	0	T helper cells	VDAC1
0	0.367572	0.885	0.653	0	T helper cells	NPM1
0	0.368364	0.487	0.201	0	T helper cells	SPTAN1
0	0.368735	0.605	0.316	0	T helper cells	PRKAR1A
0	0.369897	0.635	0.279	0	T helper cells	CD247
0	0.380686	0.598	0.315	0	T helper cells	PAK2
0	0.380828	0.558	0.271	0	T helper cells	APBB1IP
0	0.385346	0.272	0.057	0	T helper cells	MFHAS1
0	0.387132	0.486	0.21	0	T helper cells	TGIF1
0	0.390804	0.566	0.287	0	T helper cells	CCT3
0	0.397965	0.314	0.081	0	T helper cells	FURIN
0	0.401162	0.883	0.632	0	T helper cells	HINT1
0	0.401896	0.255	0.057	0	T helper cells	NCDN
0	0.401962	0.472	0.176	0	T helper cells	CD5
0	0.403595	0.285	0.074	0	T helper cells	METTL8
0	0.404144	0.901	0.715	0	T helper cells	PPIA
0	0.404849	0.555	0.258	0	T helper cells	SEC11C
0	0.406099	0.43	0.152	0	T helper cells	PDE3B
0	0.416819	0.268	0.064	0	T helper cells	TNFSF8
0	0.41713	0.489	0.175	0	T helper cells	TRAT1
0	0.419472	0.497	0.184	0	T helper cells	HNRNPLL
0	0.42121	0.606	0.296	0	T helper cells	MAT2B
0	0.422994	0.341	0.113	0	T helper cells	TIFA
0	0.426179	0.304	0.071	0	T helper cells	LIMA1
0	0.429886	0.528	0.25	0	T helper cells	TANK
0	0.432388	0.964	0.84	0	T helper cells	RPLP0
0	0.434394	0.648	0.351	0	T helper cells	SEC11A
0	0.434435	0.596	0.231	0	T helper cells	CD6
0	0.435798	0.556	0.261	0	T helper cells	SDF4
0	0.437243	0.522	0.201	0	T helper cells	RORA
0	0.444884	0.57	0.258	0	T helper cells	PPM1G
0	0.450213	0.501	0.207	0	T helper cells	DNPH1
0	0.450574	0.243	0.05	0	T helper cells	CHST7
0	0.452471	0.833	0.541	0	T helper cells	TPI1
0	0.453708	0.746	0.476	0	T helper cells	H2AFZ
0	0.454275	0.549	0.25	0	T helper cells	TNIP1
0	0.462571	0.714	0.388	0	T helper cells	ISCU
0	0.463253	0.728	0.443	0	T helper cells	PRDX1
0	0.467468	0.51	0.207	0	T helper cells	KLRB1
0	0.473367	0.262	0.046	0	T helper cells	TSHZ2
0	0.481832	0.744	0.469	0	T helper cells	GPX4
0	0.484445	0.511	0.189	0	T helper cells	SH2D1A
0	0.486064	0.402	0.127	0	T helper cells	CDK6
0	0.489422	0.819	0.511	0	T helper cells	RAN
0	0.492666	0.387	0.122	0	T helper cells	GRAMD1A
0	0.497319	0.269	0.052	0	T helper cells	BTLA
0	0.497502	0.64	0.321	0	T helper cells	NDUFV2
0	0.498387	0.757	0.421	0	T helper cells	FKBP1A
0	0.500081	0.244	0.06	0	T helper cells	PGM2L1
0	0.500346	0.683	0.357	0	T helper cells	C9orf16
0	0.501061	0.504	0.211	0	T helper cells	BHLHE40
0	0.50109	0.882	0.473	0	T helper cells	CD2
0	0.502821	0.656	0.352	0	T helper cells	CACYBP
0	0.50364	0.875	0.668	0	T helper cells	HSP90AB1
0	0.50457	0.209	0.029	0	T helper cells	PDE7B
0	0.513622	0.986	0.847	0	T helper cells	GAPDH
0	0.515035	0.475	0.188	0	T helper cells	GRSF1
0	0.515111	0.795	0.432	0	T helper cells	CD7
0	0.516304	0.491	0.158	0	T helper cells	MAF
0	0.523219	0.512	0.144	0	T helper cells	CTLA4
0	0.527366	0.682	0.406	0	T helper cells	HSPD1
0	0.52927	0.644	0.295	0	T helper cells	RBPJ
0	0.539531	0.571	0.224	0	T helper cells	CD82
0	0.547629	0.24	0.046	0	T helper cells	IGFBP4
0	0.549855	0.62	0.262	0	T helper cells	NAP1L4
0	0.550006	0.258	0.025	0	T helper cells	PTPN13
0	0.550598	0.373	0.104	0	T helper cells	AHI1
0	0.552889	0.471	0.16	0	T helper cells	SNX9
0	0.564716	0.275	0.039	0	T helper cells	CHN1
0	0.571249	0.454	0.113	0	T helper cells	TNFRSF25
0	0.587297	0.347	0.116	0	T helper cells	SESN3
0	0.589125	0.231	0.03	0	T helper cells	CD200
0	0.601578	0.505	0.221	0	T helper cells	MT1X
0	0.606494	0.62	0.298	0	T helper cells	MRPS6
0	0.608403	0.965	0.789	0	T helper cells	SRGN
0	0.612809	0.853	0.531	0	T helper cells	SOD1
0	0.615238	0.713	0.375	0	T helper cells	PGAM1
0	0.62097	0.369	0.1	0	T helper cells	KIAA0319L
0	0.630362	0.812	0.481	0	T helper cells	PKM
0	0.641265	0.398	0.123	0	T helper cells	GK
0	0.646968	0.709	0.309	0	T helper cells	ITM2A
0	0.656082	0.513	0.228	0	T helper cells	CNIH1
0	0.671087	0.679	0.279	0	T helper cells	DUSP4
0	0.679766	0.637	0.24	0	T helper cells	TIGIT
0	0.729991	0.403	0.133	0	T helper cells	MT1E
0	0.750855	0.673	0.235	0	T helper cells	BATF
0	0.834698	0.789	0.348	0	T helper cells	SPOCK2
0	0.842114	0.733	0.333	0	T helper cells	NR3C1
0	0.851729	0.285	0.02	0	T helper cells	GNG4
0	0.856241	0.752	0.471	0	T helper cells	MT2A
0	1.16258	0.689	0.162	0	T helper cells	TNFRSF18
0	1.25789	0.605	0.136	0	T helper cells	TNFRSF4
0	1.62831	0.38	0.054	0	T helper cells	NMB
0	2.09939	0.542	0.12	0	T helper cells	CXCL13
7.48331e-308	0.420487	0.912	0.73	6.55979e-303	T helper cells	HSPA8
1.66953e-307	0.350439	0.469	0.203	1.46349e-302	T helper cells	NUTF2
2.7809e-307	0.385694	0.292	0.074	2.43771e-302	T helper cells	CD40LG
9.30396e-307	0.356024	0.849	0.63	8.15576e-302	T helper cells	PCBP2
6.43381e-306	0.574805	0.146	0.006	5.63982e-301	T helper cells	IGFL2
2.61075e-305	0.316581	0.55	0.25	2.28856e-300	T helper cells	SH2D2A
2.05447e-304	0.38064	0.374	0.137	1.80093e-299	T helper cells	TRAF1
1.50331e-303	0.355118	0.522	0.245	1.31779e-298	T helper cells	C4orf48
8.69094e-303	0.379827	0.55	0.278	7.61839e-298	T helper cells	PPP1CC
1.45579e-302	0.296865	0.575	0.299	1.27613e-297	T helper cells	PSMA5
6.79968e-302	0.30168	0.91	0.706	5.96053e-297	T helper cells	BTF3
1.34519e-300	0.439292	0.438	0.181	1.17918e-295	T helper cells	TMEM173
3.03057e-298	0.444735	0.307	0.097	2.65657e-293	T helper cells	ITPR1
4.38339e-297	0.283293	0.889	0.667	3.84243e-292	T helper cells	SRP14
7.65535e-297	0.395142	0.729	0.468	6.7106e-292	T helper cells	DYNLL1
2.70464e-294	0.301785	0.758	0.487	2.37086e-289	T helper cells	SLC25A3
2.70805e-294	0.282115	0.855	0.603	2.37385e-289	T helper cells	YWHAB
4.77596e-294	0.296837	0.635	0.331	4.18656e-289	T helper cells	TRBC2
1.63721e-293	0.350155	0.372	0.13	1.43516e-288	T helper cells	FAS
7.12415e-293	0.316574	0.531	0.261	6.24495e-288	T helper cells	ILF2
3.11825e-292	0.338637	0.756	0.485	2.73343e-287	T helper cells	ARL6IP5
4.07729e-292	0.32152	0.529	0.268	3.57411e-287	T helper cells	CCT6A
9.5892e-292	0.426487	0.503	0.239	8.4058e-287	T helper cells	AHSA1
4.32461e-291	0.327813	0.633	0.351	3.79091e-286	T helper cells	H2AFV
2.0404e-290	0.297528	0.542	0.27	1.7886e-285	T helper cells	PDCD6
2.35173e-290	0.347614	0.387	0.147	2.0615e-285	T helper cells	SFXN1
8.76204e-290	0.540678	0.28	0.084	7.68072e-285	T helper cells	SLC1A4
1.887e-289	0.383339	0.17	0.021	1.65412e-284	T helper cells	BHLHE40.AS1
3.07456e-289	0.324693	0.542	0.269	2.69513e-284	T helper cells	ARID5B
9.01592e-289	0.532966	0.74	0.549	7.90327e-284	T helper cells	SARAF
6.67255e-288	0.341642	0.54	0.265	5.84909e-283	T helper cells	PRDX2
8.82556e-288	0.31053	0.595	0.317	7.7364e-283	T helper cells	VCP
9.2473e-288	0.415234	0.409	0.172	8.10609e-283	T helper cells	NFKB2
9.53006e-287	0.316942	0.674	0.395	8.35396e-282	T helper cells	SNRPG
3.40417e-286	0.313477	0.532	0.27	2.98407e-281	T helper cells	ADRM1
6.2814e-284	0.386273	0.554	0.297	5.50621e-279	T helper cells	LPXN
1.08396e-283	0.366016	0.423	0.176	9.5019e-279	T helper cells	PDCL3
2.63581e-283	0.260807	0.826	0.57	2.31052e-278	T helper cells	EDF1
1.21375e-282	0.301508	0.579	0.302	1.06396e-277	T helper cells	ARF5
4.38577e-280	0.373457	0.406	0.168	3.84452e-275	T helper cells	IGFLR1
1.06055e-279	0.329702	0.22	0.046	9.2967e-275	T helper cells	PKIA
3.62002e-278	0.326932	0.666	0.391	3.17328e-273	T helper cells	ST13
4.91566e-278	0.306255	0.804	0.548	4.30902e-273	T helper cells	CNBP
1.23821e-277	0.287076	0.296	0.094	1.08541e-272	T helper cells	STAM
2.42513e-275	0.398795	0.45	0.205	2.12584e-270	T helper cells	SNU13
2.97974e-275	0.373922	0.634	0.358	2.61201e-270	T helper cells	YWHAQ
2.29462e-274	0.31237	0.275	0.081	2.01144e-269	T helper cells	ARL3
2.36728e-274	0.313084	0.779	0.515	2.07513e-269	T helper cells	HNRNPC
4.06623e-274	0.348982	0.517	0.244	3.56442e-269	T helper cells	LAT
6.4608e-274	0.31498	0.676	0.41	5.66347e-269	T helper cells	TMEM50A
4.78356e-273	0.300456	0.43	0.181	4.19322e-268	T helper cells	CD4
3.05415e-272	0.509314	0.199	0.033	2.67724e-267	T helper cells	ZBED2
8.59785e-271	0.339252	0.568	0.306	7.53679e-266	T helper cells	TMEM123
9.65974e-271	0.314972	0.534	0.255	8.46763e-266	T helper cells	PBXIP1
4.44412e-270	0.527999	0.423	0.187	3.89567e-265	T helper cells	FKBP4
5.34709e-270	0.2504	0.629	0.36	4.68721e-265	T helper cells	UBE2I
6.3007e-269	0.425344	0.723	0.469	5.52313e-264	T helper cells	HSPE1
2.14139e-268	0.429809	0.252	0.064	1.87712e-263	T helper cells	MAL
2.86891e-268	0.319103	0.493	0.239	2.51486e-263	T helper cells	G3BP1
1.09862e-267	0.305566	0.697	0.435	9.63037e-263	T helper cells	ATP5G3
1.43814e-267	0.298325	0.523	0.266	1.26066e-262	T helper cells	POLR2E
2.46071e-267	0.381033	0.935	0.846	2.15703e-262	T helper cells	EEF1A1
3.43673e-267	0.323819	0.726	0.464	3.01261e-262	T helper cells	SEC61B
2.03679e-266	0.312181	0.402	0.166	1.78543e-261	T helper cells	GALM
2.5302e-266	0.273701	0.601	0.329	2.21795e-261	T helper cells	PSMD8
6.31883e-266	0.272569	0.768	0.48	5.53902e-261	T helper cells	LDHB
6.63843e-266	0.30483	0.413	0.165	5.81918e-261	T helper cells	CAMK4
6.69046e-266	0.348291	0.532	0.256	5.86479e-261	T helper cells	LBH
1.00296e-265	0.399728	0.361	0.137	8.79187e-261	T helper cells	TRBC1
3.69805e-264	0.304123	0.536	0.278	3.24167e-259	T helper cells	C1orf43
1.4151e-262	0.30286	0.532	0.27	1.24046e-257	T helper cells	NDUFAB1
2.90873e-262	0.275308	0.856	0.627	2.54976e-257	T helper cells	CHCHD2
5.18022e-262	0.265401	0.522	0.249	4.54093e-257	T helper cells	OPTN
5.36384e-262	0.291519	0.439	0.196	4.70189e-257	T helper cells	SF3B4
1.43845e-260	0.327723	0.565	0.295	1.26093e-255	T helper cells	GNG2
2.08094e-260	0.273867	0.58	0.319	1.82413e-255	T helper cells	TUFM
8.45217e-258	0.500688	0.19	0.04	7.40908e-253	T helper cells	ICA1
2.67371e-257	0.300768	0.955	0.793	2.34375e-252	T helper cells	RPSA
5.44892e-257	0.396956	0.354	0.14	4.77647e-252	T helper cells	STAT5A
1.31229e-256	0.347468	0.299	0.102	1.15034e-251	T helper cells	TOX
1.40352e-255	0.256034	0.686	0.422	1.23031e-250	T helper cells	SERBP1
2.33692e-255	0.254751	0.676	0.403	2.04852e-250	T helper cells	WDR83OS
3.6082e-255	0.299381	0.613	0.343	3.16291e-250	T helper cells	SHFM1
7.70379e-254	0.311495	0.626	0.358	6.75306e-249	T helper cells	PDCD4
5.30974e-253	0.279031	0.502	0.248	4.65447e-248	T helper cells	MDH1
1.1011e-252	0.26637	0.837	0.596	9.65216e-248	T helper cells	CCNI
4.18367e-252	0.258588	0.624	0.357	3.66736e-247	T helper cells	ERH
1.01843e-251	0.265873	0.571	0.32	8.9275e-247	T helper cells	C14orf166
2.21806e-250	0.286473	0.313	0.114	1.94433e-245	T helper cells	MSI2
2.53885e-250	0.618575	0.663	0.431	2.22553e-245	T helper cells	SQSTM1
1.5032e-249	0.287091	0.787	0.536	1.31769e-244	T helper cells	COX6A1
6.21353e-249	0.274911	0.456	0.215	5.44672e-244	T helper cells	DNAJA2
1.47697e-248	0.274377	0.508	0.257	1.2947e-243	T helper cells	SF3B6
1.6569e-248	0.324549	0.501	0.252	1.45242e-243	T helper cells	C1QBP
6.87709e-248	0.434458	0.649	0.394	6.02839e-243	T helper cells	HSPB1
2.0342e-247	0.319968	0.386	0.161	1.78316e-242	T helper cells	RELB
8.52049e-247	0.293	0.44	0.211	7.46898e-242	T helper cells	STIP1
2.2622e-246	0.253904	0.593	0.328	1.98302e-241	T helper cells	RNPS1
2.35864e-246	0.293963	0.526	0.278	2.06756e-241	T helper cells	CCT8
1.80205e-245	0.304371	0.447	0.216	1.57966e-240	T helper cells	TMEM167A
1.93607e-245	0.255033	0.816	0.564	1.69714e-240	T helper cells	HNRNPK
7.01687e-245	0.268594	0.666	0.396	6.15092e-240	T helper cells	C11orf58
1.34332e-244	0.315343	0.371	0.159	1.17754e-239	T helper cells	HTATIP2
2.75622e-244	0.345251	0.338	0.126	2.41607e-239	T helper cells	PDCD1
3.85854e-244	0.281929	0.665	0.402	3.38236e-239	T helper cells	CDC37
8.68649e-244	0.313105	0.366	0.154	7.61449e-239	T helper cells	ADI1
1.28779e-242	0.256414	0.531	0.267	1.12886e-237	T helper cells	MEAF6
1.4954e-242	0.338892	0.213	0.049	1.31085e-237	T helper cells	AC133644.2
1.8609e-242	0.351312	0.456	0.22	1.63125e-237	T helper cells	LIMS1
2.62894e-242	0.269643	0.435	0.205	2.3045e-237	T helper cells	MRPL34
3.22874e-242	0.270907	0.788	0.523	2.83028e-237	T helper cells	ENO1
2.63831e-241	0.276431	0.765	0.512	2.31271e-236	T helper cells	PGK1
1.72439e-240	0.375076	0.241	0.074	1.51158e-235	T helper cells	MAGEH1
2.16773e-240	0.260576	0.683	0.418	1.90021e-235	T helper cells	PSMB1
4.19913e-240	0.269526	0.416	0.19	3.68091e-235	T helper cells	FAM129A
1.69696e-239	0.288847	0.53	0.282	1.48754e-234	T helper cells	BANF1
5.49553e-239	0.262342	0.435	0.197	4.81733e-234	T helper cells	PHLDA1
5.78915e-239	0.266826	0.387	0.168	5.07471e-234	T helper cells	PPP4R2
5.95305e-239	0.256343	0.547	0.295	5.21838e-234	T helper cells	EIF3I
1.72448e-238	0.269914	0.331	0.129	1.51166e-233	T helper cells	FAM104A
2.47731e-238	0.374772	0.25	0.076	2.17159e-233	T helper cells	PASK
4.07858e-238	0.287556	0.392	0.168	3.57524e-233	T helper cells	TLK1
6.49747e-238	0.308875	0.185	0.037	5.69562e-233	T helper cells	BCAS3
1.61447e-237	0.264101	0.672	0.403	1.41523e-232	T helper cells	C19orf53
2.34126e-237	0.290232	0.681	0.432	2.05232e-232	T helper cells	ATP5B
7.05766e-237	0.453833	0.424	0.202	6.18668e-232	T helper cells	FABP5
1.85766e-236	0.267856	0.459	0.218	1.6284e-231	T helper cells	RABGAP1L
6.19949e-236	0.274789	0.729	0.474	5.43441e-231	T helper cells	TRMT112
1.79126e-235	0.306903	0.197	0.044	1.5702e-230	T helper cells	CCR4
3.16681e-235	0.2649	0.582	0.318	2.776e-230	T helper cells	NDFIP1
6.92639e-235	0.265791	0.585	0.336	6.07161e-230	T helper cells	EID1
1.4183e-234	0.309202	0.287	0.1	1.24326e-229	T helper cells	TBC1D4
5.84383e-234	0.314392	0.276	0.094	5.12265e-229	T helper cells	PHACTR2
8.43752e-234	0.274234	0.438	0.199	7.39624e-229	T helper cells	GSPT1
1.00192e-233	0.254831	0.58	0.32	8.78271e-229	T helper cells	NDUFA6
2.66983e-233	0.336916	0.203	0.049	2.34034e-228	T helper cells	FAAH2
1.00642e-231	0.31117	0.49	0.248	8.82216e-227	T helper cells	RNF19A
1.57398e-231	0.457048	0.606	0.364	1.37973e-226	T helper cells	CREM
4.79104e-231	0.299966	0.536	0.284	4.19978e-226	T helper cells	EMD
6.74866e-231	0.356723	0.404	0.187	5.91581e-226	T helper cells	NINJ1
2.06273e-229	0.256631	0.558	0.299	1.80817e-224	T helper cells	UBE2N
2.11175e-229	0.27528	0.685	0.424	1.85114e-224	T helper cells	JAK1
7.83206e-229	0.269985	0.583	0.335	6.86551e-224	T helper cells	ABRACL
2.12648e-228	0.260264	0.779	0.522	1.86405e-223	T helper cells	COX6C
3.39838e-228	0.383331	0.429	0.21	2.97898e-223	T helper cells	MTHFD2
5.61255e-228	0.263654	0.377	0.168	4.9199e-223	T helper cells	NUDT5
2.38175e-226	0.303181	0.347	0.14	2.08781e-221	T helper cells	TNIP2
6.68372e-226	0.306234	0.509	0.267	5.85889e-221	T helper cells	NUDC
9.3367e-226	0.268663	0.486	0.253	8.18445e-221	T helper cells	SUPT4H1
2.97399e-225	0.260135	0.424	0.2	2.60697e-220	T helper cells	PSMC4
1.4055e-224	0.265488	0.39	0.178	1.23205e-219	T helper cells	YIPF3
1.43281e-224	0.262971	0.252	0.082	1.25598e-219	T helper cells	C16orf87
1.95398e-223	0.25173	0.174	0.037	1.71284e-218	T helper cells	BLM
3.00365e-223	0.322717	0.618	0.357	2.63297e-218	T helper cells	BIRC3
3.08505e-223	0.26188	0.61	0.35	2.70432e-218	T helper cells	XRCC6
3.32729e-223	0.271617	0.469	0.233	2.91667e-218	T helper cells	TOMM5
5.4006e-222	0.255001	0.943	0.779	4.73411e-217	T helper cells	MYL6
6.79067e-222	0.250284	0.437	0.215	5.95263e-217	T helper cells	PSMD13
1.40408e-221	0.284906	0.572	0.319	1.2308e-216	T helper cells	SEPT6
2.01761e-220	0.292647	0.225	0.065	1.76862e-215	T helper cells	TRAF4
6.91307e-220	0.26424	0.579	0.321	6.05993e-215	T helper cells	PSMB6
2.54131e-219	0.290105	0.338	0.135	2.22769e-214	T helper cells	ADSL
1.49487e-218	0.359931	0.188	0.043	1.31039e-213	T helper cells	FBLN7
1.64853e-218	0.293782	0.82	0.593	1.44509e-213	T helper cells	MIF
1.93247e-217	0.252229	0.332	0.138	1.69398e-212	T helper cells	RIC8A
1.37756e-215	0.251658	0.497	0.254	1.20756e-210	T helper cells	MAGOH
4.26462e-215	0.283635	0.503	0.268	3.73832e-210	T helper cells	TNFAIP8
4.75947e-214	0.304046	0.365	0.156	4.17211e-209	T helper cells	C11orf73
4.88192e-214	0.349006	0.485	0.254	4.27944e-209	T helper cells	FKBP5
6.32136e-214	0.322195	0.183	0.042	5.54124e-209	T helper cells	TOX2
1.89927e-213	0.269296	0.475	0.241	1.66489e-208	T helper cells	SNRPE
8.8136e-213	0.251542	0.442	0.228	7.72591e-208	T helper cells	ACADVL
9.92016e-210	0.257719	0.354	0.156	8.69591e-205	T helper cells	REXO2
1.95623e-208	0.458209	0.241	0.08	1.71481e-203	T helper cells	JAML
3.19696e-208	0.26606	0.228	0.077	2.80242e-203	T helper cells	MYL6B
2.07828e-207	0.355881	0.758	0.576	1.8218e-202	T helper cells	OAZ1
2.17752e-205	0.272956	0.742	0.501	1.90879e-200	T helper cells	PTGES3
5.57855e-205	0.259829	0.63	0.383	4.8901e-200	T helper cells	EIF3L
6.60479e-204	0.416161	0.321	0.13	5.78969e-199	T helper cells	MT1F
7.29242e-204	0.323547	0.155	0.034	6.39246e-199	T helper cells	TRABD2A
2.62491e-203	0.390149	0.497	0.27	2.30097e-198	T helper cells	AC090498.1
1.25426e-202	0.312388	0.562	0.329	1.09947e-197	T helper cells	NBEAL1
1.3985e-202	0.257857	0.441	0.22	1.22591e-197	T helper cells	CLNS1A
1.29294e-201	0.257414	0.549	0.312	1.13338e-196	T helper cells	SELT
1.19137e-200	0.256727	0.489	0.255	1.04435e-195	T helper cells	RANBP1
1.51047e-200	0.25867	0.562	0.32	1.32407e-195	T helper cells	BZW1
2.87963e-199	0.257224	0.474	0.252	2.52425e-194	T helper cells	C20orf24
2.0872e-198	0.250508	0.448	0.231	1.82962e-193	T helper cells	CCT2
3.2578e-197	0.259308	0.253	0.091	2.85576e-192	T helper cells	SIAH2
4.64664e-195	0.293986	0.257	0.093	4.0732e-190	T helper cells	GNA15
3.1484e-194	0.36455	0.251	0.09	2.75986e-189	T helper cells	SMCO4
2.77597e-192	0.266808	0.201	0.057	2.43339e-187	T helper cells	LRRC8D
2.53494e-191	0.261345	0.902	0.715	2.22211e-186	T helper cells	HNRNPA1
3.21527e-191	0.266433	0.233	0.075	2.81847e-186	T helper cells	NDFIP2
4.5238e-191	0.402423	0.337	0.155	3.96552e-186	T helper cells	IL6ST
2.00159e-189	0.269374	0.142	0.026	1.75458e-184	T helper cells	RDH10
2.2454e-189	0.320979	0.117	0.015	1.9683e-184	T helper cells	LRRN3
4.15042e-188	0.346313	0.672	0.461	3.63822e-183	T helper cells	H3F3A
6.65889e-188	0.267617	0.259	0.091	5.83712e-183	T helper cells	ZNF281
3.16168e-187	0.338763	0.206	0.066	2.7715e-182	T helper cells	THADA
1.28913e-185	0.254077	0.185	0.046	1.13004e-180	T helper cells	DCP1B
4.04644e-185	0.260939	0.361	0.178	3.54707e-180	T helper cells	SMS
4.61737e-185	0.262024	0.443	0.233	4.04754e-180	T helper cells	NHP2
2.36666e-182	0.254883	0.308	0.125	2.07459e-177	T helper cells	FAM118A
8.92714e-180	0.267706	0.539	0.308	7.82544e-175	T helper cells	STAT3
1.12944e-179	0.261158	0.602	0.37	9.90058e-175	T helper cells	EIF5A
2.89278e-178	0.36342	0.194	0.056	2.53578e-173	T helper cells	GEM
1.55118e-174	0.250283	0.311	0.14	1.35975e-169	T helper cells	NSMCE1
2.11851e-174	0.26262	0.476	0.264	1.85706e-169	T helper cells	PPA1
3.65901e-173	0.266485	0.166	0.043	3.20745e-168	T helper cells	ETV7
1.53464e-172	0.282766	0.605	0.383	1.34525e-167	T helper cells	RPS27L
2.59225e-170	0.251713	0.102	0.012	2.27234e-165	T helper cells	LHFP
3.67826e-168	0.286218	0.568	0.333	3.22432e-163	T helper cells	MT.ATP8
1.79053e-167	0.271542	0.608	0.389	1.56956e-162	T helper cells	RAP1B
3.01041e-167	0.300001	0.429	0.237	2.63889e-162	T helper cells	CORO1B
2.05274e-166	0.333229	0.254	0.101	1.79941e-161	T helper cells	AC092580.4
8.33698e-160	0.271225	0.55	0.328	7.30811e-155	T helper cells	SLC3A2
6.75079e-159	0.476742	0.154	0.038	5.91768e-154	T helper cells	MT1G
4.2452e-158	0.263921	0.168	0.052	3.7213e-153	T helper cells	ASB2
3.31283e-153	0.27786	0.192	0.064	2.904e-148	T helper cells	TIAM1
2.23101e-149	0.321888	0.577	0.372	1.95568e-144	T helper cells	UCP2
2.4023e-148	0.252131	0.221	0.081	2.10583e-143	T helper cells	MAP1LC3A
1.00275e-147	0.298154	0.314	0.153	8.78998e-143	T helper cells	CCR7
1.58355e-147	0.359112	0.478	0.294	1.38813e-142	T helper cells	TUBB4B
5.74059e-145	0.601087	0.186	0.072	5.03214e-140	T helper cells	SOX4
5.59192e-135	0.250433	0.226	0.089	4.90182e-130	T helper cells	NFATC1
1.32763e-113	0.250736	0.897	0.747	1.16378e-108	T helper cells	HSP90AA1
8.53459e-111	0.265956	0.123	0.037	7.48134e-106	T helper cells	EPAS1
6.54605e-92	0.301816	0.326	0.202	5.7382e-87	T helper cells	LMNA
2.16265e-88	0.268891	0.171	0.077	1.89576e-83	T helper cells	CMSS1
1.86569e-83	0.298012	0.211	0.107	1.63545e-78	T helper cells	MIR155HG
4.08634e-27	0.431071	0.123	0.076	3.58204e-22	T helper cells	XCL1

## Sheet: Th17 cells
p_val	avg_logFC	pct.1	pct.2	p_val_adj	cluster	gene
0	0.323129	0.979	0.916	0	Th17 cells	RPS3
0	0.40351	0.972	0.897	0	Th17 cells	PTMA
0	0.404162	0.948	0.843	0	Th17 cells	H3F3B
0	0.409641	0.983	0.908	0	Th17 cells	RPS27
0	0.440253	0.965	0.874	0	Th17 cells	EIF1
0	0.497143	0.859	0.65	0	Th17 cells	ZFP36L2
0	0.512848	0.925	0.783	0	Th17 cells	SRGN
0	0.556809	0.858	0.673	0	Th17 cells	ZFP36
0	0.573495	0.679	0.401	0	Th17 cells	LEPROTL1
0	0.57355	0.683	0.474	0	Th17 cells	SRSF2
0	0.580929	0.942	0.811	0	Th17 cells	BTG1
0	0.584554	0.757	0.476	0	Th17 cells	TNFAIP3
0	0.597094	0.767	0.531	0	Th17 cells	SRSF7
0	0.643521	0.896	0.68	0	Th17 cells	CXCR4
0	0.653356	0.68	0.456	0	Th17 cells	DNAJA1
0	0.685495	0.711	0.405	0	Th17 cells	DUSP2
0	0.688139	0.66	0.357	0	Th17 cells	IL7R
0	0.702749	0.864	0.724	0	Th17 cells	HSPA8
0	0.722225	0.762	0.536	0	Th17 cells	SARAF
0	0.755133	0.531	0.273	0	Th17 cells	FAM177A1
0	0.800837	0.545	0.307	0	Th17 cells	TUBA4A
0	0.811677	0.655	0.358	0	Th17 cells	YPEL5
0	0.903808	0.571	0.269	0	Th17 cells	RGCC
0	0.908878	0.651	0.389	0	Th17 cells	ANXA1
0	1.13937	0.683	0.343	0	Th17 cells	CREM
3.69729e-306	0.443921	0.579	0.321	3.241e-301	Th17 cells	FYN
3.1173e-303	0.608852	0.464	0.237	2.73259e-298	Th17 cells	PIK3R1
1.96109e-294	0.616906	0.45	0.212	1.71907e-289	Th17 cells	ZNF331
2.03435e-294	0.335229	0.962	0.88	1.78329e-289	Th17 cells	RPL23A
6.44669e-288	0.557233	0.409	0.19	5.65111e-283	Th17 cells	CSRNP1
2.10734e-286	0.324976	0.959	0.848	1.84727e-281	Th17 cells	RPL3
2.48865e-286	0.591531	0.385	0.167	2.18153e-281	Th17 cells	TRAT1
7.54613e-282	0.480048	0.904	0.745	6.61486e-277	Th17 cells	RPL21
9.14933e-280	0.283133	0.98	0.925	8.02021e-275	Th17 cells	RPS27A
2.82054e-278	0.549589	0.55	0.354	2.47246e-273	Th17 cells	SELK
3.3054e-263	0.662536	0.368	0.168	2.89748e-258	Th17 cells	SLC7A5
5.16506e-262	0.683208	0.639	0.463	4.52764e-257	Th17 cells	HSPE1
6.67782e-260	0.296828	0.97	0.915	5.85371e-255	Th17 cells	RPS29
1.23336e-257	0.519506	0.434	0.192	1.08115e-252	Th17 cells	GZMK
3.57933e-256	0.358632	0.942	0.84	3.13761e-251	Th17 cells	EEF1A1
2.02855e-255	0.554772	0.385	0.185	1.7782e-250	Th17 cells	GABARAPL1
6.2315e-252	0.450636	0.744	0.589	5.46247e-247	Th17 cells	RPS28
2.56257e-250	0.27348	0.963	0.885	2.24633e-245	Th17 cells	RPS25
5.77736e-246	0.299652	0.98	0.911	5.06438e-241	Th17 cells	RPL10
7.50684e-246	0.474715	0.425	0.223	6.58042e-241	Th17 cells	CNOT6L
5.45743e-244	0.50712	0.442	0.248	4.78393e-239	Th17 cells	PDE4B
1.52694e-235	0.252467	0.982	0.929	1.3385e-230	Th17 cells	RPS14
1.04052e-234	0.343482	0.779	0.594	9.12108e-230	Th17 cells	RPL36A
1.21236e-231	0.406244	0.86	0.741	1.06274e-226	Th17 cells	PABPC1
6.57403e-230	0.531649	0.398	0.197	5.76273e-225	Th17 cells	TSPYL2
2.41078e-229	0.289101	0.829	0.687	2.11327e-224	Th17 cells	CALM1
2.48852e-229	0.411707	0.856	0.738	2.18141e-224	Th17 cells	UBB
1.85942e-228	0.499942	0.487	0.272	1.62994e-223	Th17 cells	NR4A2
2.54169e-228	0.527835	0.323	0.137	2.22802e-223	Th17 cells	VPS37B
1.34654e-227	0.499068	0.421	0.216	1.18036e-222	Th17 cells	SYTL3
6.3559e-223	0.313045	0.907	0.776	5.57152e-218	Th17 cells	RPL39
8.18244e-223	0.395104	0.909	0.796	7.17264e-218	Th17 cells	UBC
1.49577e-222	0.635265	0.86	0.742	1.31117e-217	Th17 cells	HSP90AA1
2.39786e-222	0.270042	0.982	0.927	2.10194e-217	Th17 cells	RPS18
5.0989e-222	0.482515	0.363	0.171	4.46965e-217	Th17 cells	STAT4
1.78947e-220	0.255128	0.972	0.922	1.56863e-215	Th17 cells	RPL34
3.55332e-214	0.564403	0.697	0.539	3.11481e-209	Th17 cells	LDHA
3.72492e-214	0.255172	0.975	0.915	3.26523e-209	Th17 cells	RPS15A
5.37583e-211	0.731392	0.446	0.262	4.7124e-206	Th17 cells	AC090498.1
3.3808e-210	0.358199	0.682	0.527	2.96358e-205	Th17 cells	MCL1
2.20179e-205	0.567044	0.474	0.284	1.93007e-200	Th17 cells	TUBB4B
4.12969e-205	0.480933	0.791	0.664	3.62005e-200	Th17 cells	HSP90AB1
1.0728e-204	0.340387	0.71	0.554	9.40402e-200	Th17 cells	CD44
5.41359e-204	0.715527	0.367	0.191	4.7455e-199	Th17 cells	LMNA
1.56367e-203	0.268377	0.926	0.789	1.3707e-198	Th17 cells	RPL9
8.32794e-203	0.439923	0.5	0.312	7.30019e-198	Th17 cells	EML4
1.01891e-200	0.398963	0.539	0.351	8.9317e-196	Th17 cells	PDCD4
2.58825e-199	0.252256	0.981	0.937	2.26883e-194	Th17 cells	RPS19
5.74324e-199	0.26797	0.95	0.827	5.03447e-194	Th17 cells	RPS3A
2.52765e-198	0.694022	0.742	0.56	2.21571e-193	Th17 cells	DNAJB1
4.78379e-198	0.4869	0.533	0.362	4.19342e-193	Th17 cells	DNAJB6
5.94176e-196	0.626854	0.556	0.401	5.20849e-191	Th17 cells	HSPD1
6.35423e-191	0.418026	0.26	0.107	5.57006e-186	Th17 cells	RNF125
5.34848e-190	0.459227	0.56	0.4	4.68842e-185	Th17 cells	CYCS
7.14613e-190	0.527269	0.35	0.186	6.26422e-185	Th17 cells	IFRD1
3.36048e-188	0.571552	0.373	0.199	2.94576e-183	Th17 cells	MYADM
2.58463e-187	0.250331	0.947	0.879	2.26566e-182	Th17 cells	RPS16
2.69158e-186	0.508094	0.6	0.444	2.35941e-181	Th17 cells	EZR
3.6712e-182	0.274406	0.856	0.73	3.21814e-177	Th17 cells	DDX5
1.93412e-181	0.255578	0.976	0.91	1.69543e-176	Th17 cells	RPS6
7.20643e-178	0.407814	0.285	0.133	6.31708e-173	Th17 cells	RALGAPA1
6.33995e-174	0.3703	0.551	0.377	5.55754e-169	Th17 cells	CDC42SE2
2.74923e-168	0.340902	0.549	0.399	2.40994e-163	Th17 cells	HSPA5
5.56474e-168	0.425735	0.376	0.204	4.878e-163	Th17 cells	PTGER4
1.62826e-166	0.411756	0.353	0.191	1.42731e-161	Th17 cells	FAM46C
2.20686e-165	0.29402	0.942	0.875	1.93451e-160	Th17 cells	RPS2
4.33446e-165	0.671909	0.488	0.327	3.79954e-160	Th17 cells	HSPH1
1.89178e-164	0.341528	0.592	0.44	1.65831e-159	Th17 cells	FUS
4.63475e-161	0.325328	0.606	0.405	4.06278e-156	Th17 cells	CST7
7.28352e-161	0.381697	0.659	0.531	6.38466e-156	Th17 cells	SOD1
1.76826e-160	0.399118	0.899	0.805	1.55004e-155	Th17 cells	RPL13A
5.25156e-160	0.349649	0.476	0.312	4.60347e-155	Th17 cells	PPP2R5C
1.32797e-159	0.434445	0.305	0.161	1.16409e-154	Th17 cells	JMJD6
1.94172e-157	0.335732	0.549	0.4	1.7021e-152	Th17 cells	HNRNPA0
8.7866e-156	0.318563	0.694	0.551	7.70225e-151	Th17 cells	PNRC1
8.85291e-156	0.411473	0.436	0.273	7.76037e-151	Th17 cells	ZC3HAV1
2.63499e-154	0.420829	0.36	0.208	2.30981e-149	Th17 cells	LINC.PINT
8.08935e-154	0.461894	0.357	0.202	7.09104e-149	Th17 cells	SERTAD1
4.16292e-153	0.373485	0.394	0.243	3.64917e-148	Th17 cells	RNF19A
6.64198e-150	0.432563	0.364	0.225	5.82229e-145	Th17 cells	PTP4A1
2.31611e-148	0.331315	0.477	0.307	2.03027e-143	Th17 cells	CLEC2D
3.04731e-146	0.365551	0.386	0.231	2.67124e-141	Th17 cells	ARID5A
4.64851e-146	0.295177	0.648	0.494	4.07484e-141	Th17 cells	RPS10
4.61741e-145	0.25409	0.813	0.676	4.04758e-140	Th17 cells	PTPRC
1.72662e-144	0.288473	0.686	0.562	1.51353e-139	Th17 cells	SKP1
3.58795e-144	0.417474	0.316	0.171	3.14516e-139	Th17 cells	TMEM2
3.97766e-144	0.40919	0.506	0.351	3.48678e-139	Th17 cells	SLC2A3
7.5368e-143	0.46483	0.384	0.249	6.60668e-138	Th17 cells	TGFB1
1.88433e-141	0.327414	0.279	0.133	1.65179e-136	Th17 cells	TC2N
3.13385e-140	0.561164	0.179	0.069	2.7471e-135	Th17 cells	RP11.138A9.2
1.17869e-139	0.397902	0.281	0.132	1.03323e-134	Th17 cells	TRBC1
2.55976e-138	0.369397	0.189	0.076	2.24386e-133	Th17 cells	SC5D
4.30279e-138	0.396843	0.276	0.135	3.77178e-133	Th17 cells	USP36
7.60915e-138	0.364545	0.506	0.368	6.6701e-133	Th17 cells	BRD2
1.59413e-136	0.271312	0.391	0.229	1.3974e-131	Th17 cells	CD6
8.64644e-135	0.310193	0.505	0.353	7.57938e-130	Th17 cells	BIRC3
6.79433e-134	0.359807	0.476	0.324	5.95584e-129	Th17 cells	NBEAL1
3.8026e-133	0.327718	0.828	0.675	3.33332e-128	Th17 cells	RPL7
5.37606e-133	0.433042	0.374	0.236	4.7126e-128	Th17 cells	CD55
4.7028e-132	0.35986	0.599	0.479	4.12243e-127	Th17 cells	NDUFS5
2.48784e-131	0.363238	0.648	0.462	2.18081e-126	Th17 cells	CD69
4.40727e-131	0.301121	0.52	0.359	3.86337e-126	Th17 cells	STK17A
2.26685e-130	0.303374	0.64	0.504	1.9871e-125	Th17 cells	RBM39
1.15523e-129	0.358454	0.282	0.146	1.01266e-124	Th17 cells	FOSL2
6.64113e-129	0.359486	0.486	0.349	5.82154e-124	Th17 cells	GPBP1
9.38574e-129	0.267445	0.843	0.783	8.22745e-124	Th17 cells	RPL41
7.41403e-128	0.389155	0.474	0.334	6.49907e-123	Th17 cells	NR3C1
8.17601e-128	0.355424	0.99	0.964	7.16701e-123	Th17 cells	MALAT1
1.12734e-127	0.383482	0.344	0.199	9.88217e-123	Th17 cells	RORA
5.83874e-127	0.320423	0.522	0.386	5.11818e-122	Th17 cells	DDX24
1.3278e-126	0.359849	0.267	0.145	1.16394e-121	Th17 cells	ISCA1
1.2519e-123	0.382214	0.346	0.213	1.0974e-118	Th17 cells	SYAP1
3.28462e-123	0.397858	0.399	0.276	2.87927e-118	Th17 cells	PPP1CB
3.83151e-123	0.333033	0.474	0.329	3.35866e-118	Th17 cells	RHOH
4.70876e-123	0.415165	0.259	0.137	4.12765e-118	Th17 cells	ZC3H12A
3.51e-122	0.563295	0.179	0.07	3.07683e-117	Th17 cells	RP11.138A9.1
6.25372e-121	0.296303	0.547	0.416	5.48195e-116	Th17 cells	SF1
1.61889e-120	0.36297	0.947	0.88	1.4191e-115	Th17 cells	FTH1
1.94999e-119	0.3242	0.5	0.38	1.70934e-114	Th17 cells	MAP1LC3B
2.68425e-119	0.329208	0.427	0.28	2.35298e-114	Th17 cells	DUSP4
9.81313e-119	0.463162	0.452	0.324	8.60209e-114	Th17 cells	SLC3A2
1.36535e-118	0.362105	0.337	0.218	1.19685e-113	Th17 cells	AMD1
7.0806e-118	0.357367	0.26	0.138	6.20678e-113	Th17 cells	SATB1
3.37156e-116	0.264563	0.807	0.675	2.95548e-111	Th17 cells	TSC22D3
4.48062e-115	0.254326	0.63	0.505	3.92767e-110	Th17 cells	CYTIP
1.00571e-113	0.323794	0.489	0.36	8.81594e-109	Th17 cells	UBE2B
1.19766e-112	0.355266	0.47	0.337	1.04985e-107	Th17 cells	TUBA1A
6.89729e-112	0.308055	0.422	0.297	6.04609e-107	Th17 cells	SMCHD1
6.36987e-111	0.474465	0.357	0.227	5.58376e-106	Th17 cells	PRNP
9.62597e-111	0.426971	0.803	0.688	8.43803e-106	Th17 cells	JUNB
1.04622e-110	0.287463	0.447	0.324	9.17106e-106	Th17 cells	IDS
7.52433e-110	0.376507	0.672	0.549	6.59575e-105	Th17 cells	RPS17
3.5176e-109	0.299043	0.495	0.388	3.0835e-104	Th17 cells	EIF5
3.89709e-109	0.291567	0.403	0.27	3.41615e-104	Th17 cells	SLC38A1
3.99795e-109	0.370608	0.574	0.451	3.50456e-104	Th17 cells	PPP1R15A
7.28428e-109	0.296002	0.395	0.247	6.38533e-104	Th17 cells	SH2D2A
1.47487e-107	0.347104	0.48	0.345	1.29286e-102	Th17 cells	CLEC2B
9.67928e-107	0.284973	0.391	0.238	8.48476e-102	Th17 cells	CD8A
2.60582e-106	0.293512	0.419	0.293	2.28424e-101	Th17 cells	GNG2
8.14558e-105	0.376345	0.4	0.28	7.14034e-100	Th17 cells	ATP1B3
2.14071e-104	0.299117	0.495	0.376	1.87652e-99	Th17 cells	PPP1R2
2.26105e-104	0.379024	0.422	0.292	1.98201e-99	Th17 cells	REL
2.83934e-104	0.287698	0.483	0.351	2.48893e-99	Th17 cells	SAMSN1
1.13584e-102	0.272991	0.631	0.513	9.95667e-98	Th17 cells	EIF4A2
1.59576e-102	0.293325	0.29	0.162	1.39883e-97	Th17 cells	CAMK4
3.71761e-102	0.318286	0.246	0.138	3.25882e-97	Th17 cells	H2AFX
8.70934e-102	0.336398	0.184	0.082	7.63452e-97	Th17 cells	S1PR1
3.39752e-101	0.320903	0.379	0.262	2.97823e-96	Th17 cells	G3BP2
4.71226e-101	0.390411	0.409	0.272	4.13072e-96	Th17 cells	GPR183
6.43309e-101	0.374946	0.361	0.237	5.63918e-96	Th17 cells	CCNH
1.51196e-100	0.263127	0.528	0.404	1.32537e-95	Th17 cells	KMT2E
4.44567e-100	0.288586	0.165	0.072	3.89703e-95	Th17 cells	MPZL3
4.61052e-100	0.378672	0.295	0.175	4.04153e-95	Th17 cells	SKIL
5.05641e-100	0.352548	0.22	0.115	4.4324e-95	Th17 cells	PLK3
1.15489e-99	0.356305	0.441	0.315	1.01237e-94	Th17 cells	RSRP1
1.14165e-98	0.264724	0.127	0.044	1.00076e-93	Th17 cells	AUTS2
3.98026e-98	0.271088	0.593	0.478	3.48905e-93	Th17 cells	SRSF3
8.11973e-98	0.319273	0.277	0.16	7.11767e-93	Th17 cells	LYAR
3.18926e-97	0.361632	0.398	0.282	2.79567e-92	Th17 cells	EMD
1.27881e-96	0.353001	0.309	0.199	1.121e-91	Th17 cells	BCAS2
1.29884e-96	0.346367	0.147	0.058	1.13855e-91	Th17 cells	TUBB2A
2.09555e-96	0.324381	0.268	0.154	1.83694e-91	Th17 cells	SETD2
5.66804e-96	0.276529	0.527	0.407	4.96855e-91	Th17 cells	RBM8A
1.11484e-95	0.379778	0.29	0.174	9.77261e-91	Th17 cells	PDCL3
1.14334e-95	0.332662	0.311	0.197	1.00224e-90	Th17 cells	GSPT1
1.85939e-95	0.325505	0.332	0.225	1.62992e-90	Th17 cells	SBDS
3.03787e-95	0.331919	0.317	0.202	2.66297e-90	Th17 cells	SLBP
4.15038e-95	0.279985	0.19	0.093	3.63818e-90	Th17 cells	PBX4
4.36834e-95	0.304593	0.431	0.321	3.82924e-90	Th17 cells	DDX3X
2.49855e-94	0.290518	0.217	0.113	2.1902e-89	Th17 cells	CDK17
1.5307e-93	0.283813	0.59	0.475	1.34179e-88	Th17 cells	H2AFZ
5.28584e-93	0.331315	0.381	0.26	4.63351e-88	Th17 cells	CLDND1
2.46355e-92	0.283229	0.539	0.429	2.15952e-87	Th17 cells	LITAF
4.50562e-92	0.272492	0.56	0.434	3.94959e-87	Th17 cells	DDIT4
2.85665e-91	0.253108	0.589	0.484	2.50411e-86	Th17 cells	EIF4G2
5.42803e-91	0.309277	0.324	0.197	4.75816e-86	Th17 cells	PARP8
1.85497e-90	0.256139	0.384	0.274	1.62605e-85	Th17 cells	ATP1A1
1.94613e-90	0.28154	0.476	0.36	1.70596e-85	Th17 cells	CLK1
1.17328e-89	0.307883	0.311	0.201	1.02849e-84	Th17 cells	RANBP2
1.81432e-89	0.367267	0.43	0.303	1.59042e-84	Th17 cells	GADD45B
5.11594e-89	0.301886	0.198	0.109	4.48458e-84	Th17 cells	TIPARP
3.91863e-88	0.294987	0.266	0.148	3.43504e-83	Th17 cells	CCR7
8.32079e-88	0.309331	0.314	0.204	7.29392e-83	Th17 cells	SNU13
2.38672e-87	0.334915	0.286	0.185	2.09217e-82	Th17 cells	TOB1
1.22926e-86	0.264062	0.584	0.481	1.07756e-81	Th17 cells	SRSF5
1.47997e-86	0.300294	0.256	0.149	1.29732e-81	Th17 cells	KDM6B
3.36276e-86	0.431928	0.246	0.151	2.94776e-81	Th17 cells	NEU1
3.5258e-86	0.265249	0.286	0.184	3.09069e-81	Th17 cells	CCSER2
2.1876e-85	0.287948	0.197	0.097	1.91762e-80	Th17 cells	P2RY8
1.93732e-84	0.319842	0.204	0.108	1.69823e-79	Th17 cells	OAT
7.66479e-83	0.29256	0.313	0.21	6.71887e-78	Th17 cells	TGIF1
4.41975e-82	0.31044	0.317	0.213	3.87431e-77	Th17 cells	CHD1
7.12091e-81	0.310633	0.235	0.141	6.24212e-76	Th17 cells	KPNA2
1.10739e-80	0.301866	0.427	0.319	9.70726e-76	Th17 cells	BZW1
1.66556e-80	0.258418	0.217	0.121	1.46001e-75	Th17 cells	OASL
5.94512e-80	0.291061	0.375	0.268	5.21143e-75	Th17 cells	NOP58
4.87234e-77	0.434162	0.717	0.613	4.27104e-72	Th17 cells	JUN
1.71522e-76	0.275931	0.256	0.153	1.50355e-71	Th17 cells	P2RY10
9.07621e-76	0.311069	0.197	0.105	7.95612e-71	Th17 cells	DUSP10
2.49882e-75	0.286914	0.287	0.176	2.19044e-70	Th17 cells	HERPUD2
6.41196e-75	0.287854	0.282	0.168	5.62066e-70	Th17 cells	PDE4D
7.44313e-75	0.271149	0.12	0.05	6.52457e-70	Th17 cells	RP11.51J9.5
3.62771e-74	0.256692	0.318	0.22	3.18001e-69	Th17 cells	APMAP
4.2536e-74	0.304041	0.297	0.197	3.72866e-69	Th17 cells	IDI1
4.49189e-74	0.318347	0.311	0.214	3.93755e-69	Th17 cells	NAA50
7.65271e-74	0.291295	0.585	0.502	6.70829e-69	Th17 cells	PTGES3
9.68847e-74	0.291271	0.292	0.187	8.49282e-69	Th17 cells	SNHG12
9.87099e-74	0.316578	0.265	0.159	8.65282e-69	Th17 cells	PFKFB3
1.13363e-73	0.35147	0.499	0.404	9.93725e-69	Th17 cells	BTG2
2.00663e-73	0.284433	0.3	0.195	1.75899e-68	Th17 cells	AKIRIN1
2.96988e-73	0.304287	0.299	0.207	2.60337e-68	Th17 cells	EIF4A3
1.49576e-72	0.277899	0.285	0.184	1.31117e-67	Th17 cells	MGAT4A
1.60541e-72	0.30721	0.203	0.112	1.40728e-67	Th17 cells	HEXIM1
2.1511e-72	0.295133	0.345	0.249	1.88563e-67	Th17 cells	BAZ1A
4.74127e-72	0.267697	0.367	0.269	4.15615e-67	Th17 cells	ARID5B
1.12582e-70	0.446654	0.276	0.187	9.86881e-66	Th17 cells	FKBP4
2.04986e-70	0.385905	0.451	0.354	1.79688e-65	Th17 cells	CACYBP
2.0703e-70	0.286232	0.301	0.202	1.81481e-65	Th17 cells	GPR65
2.44505e-70	0.411602	0.227	0.133	2.1433e-65	Th17 cells	AREG
3.10266e-68	0.443162	0.314	0.207	2.71976e-63	Th17 cells	KLRB1
1.4176e-67	0.250911	0.209	0.122	1.24265e-62	Th17 cells	JOSD1
1.45366e-67	0.455267	0.152	0.076	1.27427e-62	Th17 cells	XCL2
1.7879e-67	0.33079	0.131	0.059	1.56726e-62	Th17 cells	TNFSF9
2.26095e-67	0.269654	0.208	0.124	1.98193e-62	Th17 cells	PAF1
6.67721e-67	0.461618	0.142	0.072	5.85318e-62	Th17 cells	XCL1
8.52855e-67	0.253548	0.208	0.118	7.47604e-62	Th17 cells	ABLIM1
9.12489e-67	0.284952	0.201	0.113	7.99878e-62	Th17 cells	ELL2
9.89351e-67	0.28948	0.272	0.18	8.67255e-62	Th17 cells	DNAJB9
1.09788e-66	0.332581	0.25	0.154	9.6239e-62	Th17 cells	ODC1
3.18014e-65	0.312884	0.338	0.245	2.78768e-60	Th17 cells	SLC38A2
6.67099e-65	0.34536	0.727	0.592	5.84773e-60	Th17 cells	DUSP1
1.88006e-64	0.262112	0.26	0.174	1.64804e-59	Th17 cells	DNTTIP2
6.52026e-62	0.273181	0.24	0.151	5.71559e-57	Th17 cells	TSPYL1
9.16198e-62	0.443363	0.226	0.139	8.0313e-57	Th17 cells	ZFAND2A
9.80912e-62	0.271694	0.477	0.387	8.59858e-57	Th17 cells	ELF1
1.5635e-61	0.289447	0.573	0.465	1.37054e-56	Th17 cells	IER2
5.11765e-59	0.283655	0.437	0.332	4.48608e-54	Th17 cells	MT.ATP8
9.27619e-59	0.264854	0.178	0.105	8.13142e-54	Th17 cells	DDX3Y
1.91871e-58	0.307063	0.199	0.121	1.68192e-53	Th17 cells	ARL4A
2.50967e-58	0.308687	0.409	0.323	2.19995e-53	Th17 cells	GLIPR1
8.98264e-58	0.287884	0.319	0.235	7.87409e-53	Th17 cells	MAT2A
5.00583e-57	0.265732	0.265	0.184	4.38806e-52	Th17 cells	B4GALT1
1.2317e-56	0.298212	0.173	0.102	1.0797e-51	Th17 cells	DCTN6
1.79286e-56	0.255425	0.146	0.077	1.5716e-51	Th17 cells	POLR3E
3.49522e-56	0.251366	0.33	0.249	3.06388e-51	Th17 cells	FGFR1OP2
1.82519e-55	0.294079	0.132	0.066	1.59994e-50	Th17 cells	CRTAM
5.78506e-55	0.253327	0.295	0.201	5.07113e-50	Th17 cells	EIF4A1
3.84399e-53	0.391275	0.163	0.099	3.3696e-48	Th17 cells	BAG3
4.59513e-52	0.307408	0.244	0.161	4.02804e-47	Th17 cells	SRRT
6.44135e-52	0.29926	0.153	0.088	5.64642e-47	Th17 cells	ANKRD37
2.01075e-51	0.260932	0.239	0.166	1.7626e-46	Th17 cells	NOP56
9.22998e-51	0.262795	0.265	0.189	8.09091e-46	Th17 cells	GTF2B
1.41647e-50	0.263901	0.374	0.301	1.24166e-45	Th17 cells	HNRNPH1
3.60006e-49	0.259829	0.31	0.224	3.15577e-44	Th17 cells	CDKN1A
1.1371e-48	0.273742	0.197	0.128	9.96772e-44	Th17 cells	NUDT4
1.23933e-47	0.290031	0.283	0.208	1.08639e-42	Th17 cells	CHORDC1
1.96491e-47	0.282507	0.137	0.078	1.72242e-42	Th17 cells	RP11.347P5.1
5.09413e-47	0.252947	0.243	0.168	4.46546e-42	Th17 cells	SNHG15
1.74773e-38	0.265595	0.243	0.175	1.53204e-33	Th17 cells	FAM133B
2.6223e-38	0.278907	0.116	0.063	2.29868e-33	Th17 cells	MAFF
2.63027e-35	0.695676	0.535	0.496	2.30567e-30	Th17 cells	HSPA1A
1.41817e-31	0.259106	0.199	0.138	1.24315e-26	Th17 cells	DDIT3
8.16473e-31	0.33191	0.63	0.55	7.15712e-26	Th17 cells	FOS
1.71658e-30	0.253707	0.125	0.083	1.50473e-25	Th17 cells	C1orf56
2.15808e-30	0.364448	0.228	0.178	1.89175e-25	Th17 cells	CMC1
8.78588e-24	0.537507	0.437	0.401	7.70161e-19	Th17 cells	HSPA1B
1.7273e-23	0.297142	0.253	0.207	1.51413e-18	Th17 cells	NR4A1
4.51991e-22	0.901328	0.139	0.096	3.96211e-17	Th17 cells	HSPA6
1.71043e-16	0.29548	0.27	0.227	1.49935e-11	Th17 cells	MT1X
3.73248e-16	0.256859	0.249	0.222	3.27186e-11	Th17 cells	MRPL18

## Sheet: Proliferative T cells
p_val	avg_logFC	pct.1	pct.2	p_val_adj	cluster	gene
0	0.253219	0.166	0.011	0	Proliferative T cells	CCNF
0	0.255495	0.166	0.01	0	Proliferative T cells	WDHD1
0	0.257698	0.161	0.003	0	Proliferative T cells	SKA3
0	0.259728	0.398	0.14	0	Proliferative T cells	SNRNP40
0	0.263586	0.33	0.102	0	Proliferative T cells	DPM2
0	0.265153	0.159	0.006	0	Proliferative T cells	BUB1B
0	0.269633	0.265	0.064	0	Proliferative T cells	MAGOHB
0	0.271868	0.416	0.146	0	Proliferative T cells	SFXN1
0	0.27306	0.379	0.131	0	Proliferative T cells	MRPL22
0	0.274466	0.347	0.108	0	Proliferative T cells	AKR7A2
0	0.27939	0.451	0.174	0	Proliferative T cells	HDAC1
0	0.280233	0.504	0.217	0	Proliferative T cells	PDAP1
0	0.282189	0.338	0.092	0	Proliferative T cells	ANAPC15
0	0.282824	0.328	0.083	0	Proliferative T cells	DDB2
0	0.283896	0.153	0.003	0	Proliferative T cells	KIF4A
0	0.287502	0.184	0.014	0	Proliferative T cells	RFC3
0	0.287795	0.163	0.003	0	Proliferative T cells	DIAPH3
0	0.28847	0.529	0.237	0	Proliferative T cells	GSTO1
0	0.289012	0.304	0.08	0	Proliferative T cells	GMPS
0	0.289535	0.398	0.137	0	Proliferative T cells	COPS3
0	0.291073	0.217	0.034	0	Proliferative T cells	POLD3
0	0.291506	0.177	0.003	0	Proliferative T cells	SKA1
0	0.291635	0.169	0.003	0	Proliferative T cells	MCM10
0	0.292374	0.214	0.022	0	Proliferative T cells	RFC5
0	0.293629	0.572	0.274	0	Proliferative T cells	KPNB1
0	0.294361	0.339	0.093	0	Proliferative T cells	COMMD4
0	0.295457	0.513	0.212	0	Proliferative T cells	POLR2G
0	0.296352	0.391	0.137	0	Proliferative T cells	ARL6IP6
0	0.297873	0.423	0.148	0	Proliferative T cells	CYB5B
0	0.298721	0.31	0.074	0	Proliferative T cells	WDR54
0	0.299027	0.18	0.006	0	Proliferative T cells	DEPDC1B
0	0.299988	0.347	0.087	0	Proliferative T cells	TMEM14A
0	0.300149	0.299	0.064	0	Proliferative T cells	RAD51C
0	0.300774	0.3	0.073	0	Proliferative T cells	ACTL6A
0	0.301224	0.379	0.112	0	Proliferative T cells	PPIH
0	0.301458	0.174	0.009	0	Proliferative T cells	RMI2
0	0.302781	0.23	0.027	0	Proliferative T cells	DSN1
0	0.303017	0.229	0.028	0	Proliferative T cells	CDK2
0	0.303151	0.435	0.164	0	Proliferative T cells	GALM
0	0.303678	0.531	0.246	0	Proliferative T cells	RBBP4
0	0.303822	0.254	0.041	0	Proliferative T cells	RPL39L
0	0.304661	0.491	0.201	0	Proliferative T cells	CMC2
0	0.305968	0.325	0.083	0	Proliferative T cells	POP7
0	0.307261	0.413	0.155	0	Proliferative T cells	ETFB
0	0.307525	0.181	0.01	0	Proliferative T cells	SPAG5
0	0.307569	0.504	0.225	0	Proliferative T cells	PHPT1
0	0.309568	0.263	0.061	0	Proliferative T cells	CKAP5
0	0.310312	0.619	0.327	0	Proliferative T cells	RNPS1
0	0.310464	0.164	0.004	0	Proliferative T cells	ANLN
0	0.312038	0.294	0.06	0	Proliferative T cells	ACYP1
0	0.312119	0.367	0.102	0	Proliferative T cells	TPGS2
0	0.312546	0.577	0.263	0	Proliferative T cells	NAP1L4
0	0.313512	0.166	0.003	0	Proliferative T cells	PBK
0	0.3136	0.482	0.201	0	Proliferative T cells	TMEM160
0	0.31382	0.622	0.305	0	Proliferative T cells	ENSA
0	0.314246	0.247	0.04	0	Proliferative T cells	TUBG1
0	0.314645	0.545	0.242	0	Proliferative T cells	PTBP1
0	0.31469	0.413	0.146	0	Proliferative T cells	VBP1
0	0.314805	0.578	0.285	0	Proliferative T cells	PPP4C
0	0.315162	0.395	0.14	0	Proliferative T cells	MTCH2
0	0.316569	0.352	0.096	0	Proliferative T cells	EXOSC8
0	0.31675	0.56	0.271	0	Proliferative T cells	NDUFA12
0	0.317132	0.2	0.008	0	Proliferative T cells	SGOL1
0	0.318676	0.659	0.359	0	Proliferative T cells	UBE2I
0	0.318807	0.185	0.007	0	Proliferative T cells	CDC6
0	0.31895	0.276	0.056	0	Proliferative T cells	RBBP8
0	0.319174	0.344	0.097	0	Proliferative T cells	POLR3K
0	0.319932	0.192	0.014	0	Proliferative T cells	SGOL2
0	0.320227	0.311	0.073	0	Proliferative T cells	HAUS1
0	0.320235	0.41	0.148	0	Proliferative T cells	LAGE3
0	0.320462	0.418	0.15	0	Proliferative T cells	CEP57
0	0.321062	0.311	0.073	0	Proliferative T cells	POLD2
0	0.321605	0.289	0.05	0	Proliferative T cells	BCL2L12
0	0.321921	0.524	0.228	0	Proliferative T cells	SSNA1
0	0.322495	0.289	0.058	0	Proliferative T cells	HADH
0	0.322604	0.312	0.07	0	Proliferative T cells	PAFAH1B3
0	0.324169	0.313	0.074	0	Proliferative T cells	MYL6B
0	0.327055	0.308	0.08	0	Proliferative T cells	ARL3
0	0.327438	0.219	0.018	0	Proliferative T cells	TIMELESS
0	0.327616	0.603	0.299	0	Proliferative T cells	NDUFA2
0	0.327708	0.272	0.048	0	Proliferative T cells	ITGB3BP
0	0.328331	0.487	0.202	0	Proliferative T cells	NUTF2
0	0.328551	0.268	0.036	0	Proliferative T cells	LRR1
0	0.328616	0.608	0.315	0	Proliferative T cells	YWHAE
0	0.328933	0.505	0.203	0	Proliferative T cells	MPC2
0	0.329272	0.369	0.1	0	Proliferative T cells	MRPL37
0	0.331302	0.574	0.285	0	Proliferative T cells	EIF2S2
0	0.33198	0.251	0.037	0	Proliferative T cells	NCAPD3
0	0.332854	0.167	0.004	0	Proliferative T cells	SPC24
0	0.333104	0.454	0.175	0	Proliferative T cells	LBR
0	0.334389	0.505	0.22	0	Proliferative T cells	NDUFB6
0	0.334656	0.346	0.101	0	Proliferative T cells	SUZ12
0	0.335011	0.513	0.197	0	Proliferative T cells	PIN1
0	0.335201	0.569	0.261	0	Proliferative T cells	POLR2K
0	0.335305	0.515	0.231	0	Proliferative T cells	PSMA3
0	0.336012	0.712	0.384	0	Proliferative T cells	TXN
0	0.337383	0.414	0.133	0	Proliferative T cells	MRPL11
0	0.337597	0.444	0.163	0	Proliferative T cells	HSD17B10
0	0.337632	0.381	0.12	0	Proliferative T cells	SHMT2
0	0.337694	0.282	0.049	0	Proliferative T cells	TEX30
0	0.337919	0.467	0.172	0	Proliferative T cells	SNRPA
0	0.338834	0.429	0.154	0	Proliferative T cells	STOML2
0	0.33913	0.424	0.143	0	Proliferative T cells	RNASEH2B
0	0.339153	0.291	0.059	0	Proliferative T cells	TOPBP1
0	0.33996	0.392	0.131	0	Proliferative T cells	TIMM10
0	0.340647	0.518	0.231	0	Proliferative T cells	NHP2
0	0.340656	0.777	0.536	0	Proliferative T cells	COX6A1
0	0.341508	0.414	0.142	0	Proliferative T cells	ZCRB1
0	0.341573	0.339	0.104	0	Proliferative T cells	HDGF
0	0.342278	0.508	0.217	0	Proliferative T cells	GTF3C6
0	0.342423	0.489	0.207	0	Proliferative T cells	DNPH1
0	0.342905	0.523	0.238	0	Proliferative T cells	UBE2A
0	0.343207	0.384	0.121	0	Proliferative T cells	MRPL13
0	0.343601	0.517	0.221	0	Proliferative T cells	PSMG2
0	0.344199	0.431	0.164	0	Proliferative T cells	NOP56
0	0.344711	0.601	0.298	0	Proliferative T cells	CLTA
0	0.3452	0.247	0.034	0	Proliferative T cells	IFI27L1
0	0.345368	0.181	0.013	0	Proliferative T cells	PRR11
0	0.346612	0.457	0.166	0	Proliferative T cells	NUDT5
0	0.349166	0.29	0.055	0	Proliferative T cells	RFC2
0	0.350723	0.209	0.004	0	Proliferative T cells	MND1
0	0.352308	0.557	0.23	0	Proliferative T cells	PTPN7
0	0.352346	0.453	0.156	0	Proliferative T cells	FIBP
0	0.352699	0.412	0.137	0	Proliferative T cells	SUPT16H
0	0.353095	0.611	0.29	0	Proliferative T cells	AP2S1
0	0.35502	0.716	0.408	0	Proliferative T cells	POMP
0	0.355384	0.603	0.298	0	Proliferative T cells	PSMA5
0	0.35562	0.573	0.26	0	Proliferative T cells	NDUFS8
0	0.356505	0.412	0.15	0	Proliferative T cells	PRKDC
0	0.356551	0.603	0.282	0	Proliferative T cells	TALDO1
0	0.356782	0.632	0.328	0	Proliferative T cells	PDIA6
0	0.356925	0.204	0.011	0	Proliferative T cells	MYBL2
0	0.357665	0.413	0.137	0	Proliferative T cells	PMVK
0	0.357825	0.502	0.202	0	Proliferative T cells	YWHAH
0	0.358755	0.586	0.297	0	Proliferative T cells	RBPJ
0	0.359059	0.651	0.371	0	Proliferative T cells	PRELID1
0	0.359198	0.397	0.111	0	Proliferative T cells	BOLA3
0	0.359353	0.822	0.552	0	Proliferative T cells	TPM3
0	0.360033	0.553	0.233	0	Proliferative T cells	IFI27L2
0	0.360552	0.503	0.195	0	Proliferative T cells	ITGAE
0	0.361758	0.215	0.009	0	Proliferative T cells	SHCBP1
0	0.361901	0.613	0.297	0	Proliferative T cells	UBE2N
0	0.362938	0.219	0.017	0	Proliferative T cells	ARHGAP11A
0	0.363004	0.431	0.142	0	Proliferative T cells	PSMD14
0	0.363914	0.641	0.294	0	Proliferative T cells	CKLF
0	0.364264	0.462	0.175	0	Proliferative T cells	SMS
0	0.364541	0.249	0.021	0	Proliferative T cells	NCAPH
0	0.365673	0.341	0.073	0	Proliferative T cells	ACAT2
0	0.365801	0.274	0.046	0	Proliferative T cells	BARD1
0	0.36619	0.377	0.121	0	Proliferative T cells	SIRPG
0	0.366855	0.547	0.269	0	Proliferative T cells	NDUFAB1
0	0.367941	0.789	0.526	0	Proliferative T cells	NDUFA4
0	0.368011	0.943	0.779	0	Proliferative T cells	MYL6
0	0.368593	0.238	0.014	0	Proliferative T cells	NCAPG2
0	0.369211	0.213	0.023	0	Proliferative T cells	BRCA2
0	0.36974	0.419	0.139	0	Proliferative T cells	BAZ1B
0	0.370381	0.477	0.166	0	Proliferative T cells	ITGB1BP1
0	0.3705	0.359	0.081	0	Proliferative T cells	NABP2
0	0.372168	0.511	0.204	0	Proliferative T cells	DCTN3
0	0.372624	0.298	0.056	0	Proliferative T cells	NCAPH2
0	0.373391	0.214	0.025	0	Proliferative T cells	MXD3
0	0.37343	0.21	0.006	0	Proliferative T cells	FOXM1
0	0.373573	0.292	0.054	0	Proliferative T cells	VRK1
0	0.374267	0.368	0.106	0	Proliferative T cells	HAT1
0	0.375044	0.257	0.033	0	Proliferative T cells	NRM
0	0.37506	0.638	0.314	0	Proliferative T cells	XRCC5
0	0.375355	0.636	0.368	0	Proliferative T cells	EIF5A
0	0.375861	0.225	0.022	0	Proliferative T cells	CHAF1A
0	0.376308	0.21	0.004	0	Proliferative T cells	CDC45
0	0.378157	0.622	0.32	0	Proliferative T cells	PSMB6
0	0.378849	0.317	0.065	0	Proliferative T cells	TFDP1
0	0.379925	0.603	0.26	0	Proliferative T cells	ARPC5L
0	0.38038	0.581	0.264	0	Proliferative T cells	APOBEC3G
0	0.381456	0.741	0.418	0	Proliferative T cells	DBI
0	0.381785	0.79	0.457	0	Proliferative T cells	NAP1L1
0	0.381909	0.225	0.006	0	Proliferative T cells	RAD51
0	0.382038	0.561	0.246	0	Proliferative T cells	MDH1
0	0.382105	0.498	0.199	0	Proliferative T cells	MEA1
0	0.382598	0.405	0.115	0	Proliferative T cells	HINT2
0	0.383664	0.332	0.079	0	Proliferative T cells	CKAP2
0	0.38438	0.184	0.004	0	Proliferative T cells	KIF14
0	0.385044	0.559	0.264	0	Proliferative T cells	PRDX2
0	0.386336	0.487	0.188	0	Proliferative T cells	RNASEH2C
0	0.387037	0.24	0.025	0	Proliferative T cells	SAC3D1
0	0.387475	0.558	0.199	0	Proliferative T cells	RAB27A
0	0.387557	0.294	0.061	0	Proliferative T cells	PAICS
0	0.387675	0.205	0.006	0	Proliferative T cells	ESCO2
0	0.388357	0.209	0.009	0	Proliferative T cells	BUB1
0	0.389942	0.551	0.232	0	Proliferative T cells	PARP1
0	0.390532	0.744	0.447	0	Proliferative T cells	GNG5
0	0.391883	0.26	0.047	0	Proliferative T cells	CDKN2C
0	0.392226	0.632	0.318	0	Proliferative T cells	NDUFA6
0	0.394249	0.721	0.42	0	Proliferative T cells	SERBP1
0	0.396015	0.574	0.257	0	Proliferative T cells	PPM1G
0	0.396823	0.494	0.195	0	Proliferative T cells	TXNDC17
0	0.397086	0.361	0.093	0	Proliferative T cells	DCTPP1
0	0.399293	0.398	0.111	0	Proliferative T cells	ZDHHC12
0	0.399334	0.48	0.17	0	Proliferative T cells	PSIP1
0	0.399662	0.289	0.076	0	Proliferative T cells	NME1
0	0.399829	0.611	0.29	0	Proliferative T cells	CDK2AP2
0	0.400394	0.287	0.036	0	Proliferative T cells	NCAPD2
0	0.401505	0.74	0.421	0	Proliferative T cells	FKBP1A
0	0.402628	0.752	0.487	0	Proliferative T cells	SLC25A3
0	0.402812	0.514	0.199	0	Proliferative T cells	APOBEC3C
0	0.402974	0.21	0.005	0	Proliferative T cells	CDCA2
0	0.403746	0.372	0.094	0	Proliferative T cells	CDC25B
0	0.404842	0.288	0.045	0	Proliferative T cells	WHSC1
0	0.405401	0.225	0.008	0	Proliferative T cells	CASC5
0	0.405449	0.312	0.052	0	Proliferative T cells	C19orf48
0	0.406676	0.228	0.016	0	Proliferative T cells	AURKA
0	0.408776	0.58	0.27	0	Proliferative T cells	SRSF10
0	0.408816	0.629	0.303	0	Proliferative T cells	NDUFS6
0	0.409038	0.577	0.251	0	Proliferative T cells	NDUFB3
0	0.409116	0.235	0.006	0	Proliferative T cells	MELK
0	0.409801	0.366	0.084	0	Proliferative T cells	GGCT
0	0.409992	0.746	0.438	0	Proliferative T cells	HNRNPA3
0	0.410704	0.754	0.422	0	Proliferative T cells	ARPC5
0	0.410775	0.58	0.234	0	Proliferative T cells	BLOC1S1
0	0.410924	0.506	0.188	0	Proliferative T cells	VDAC3
0	0.411309	0.819	0.531	0	Proliferative T cells	PSMA7
0	0.411493	0.314	0.056	0	Proliferative T cells	CDKN2A
0	0.412534	0.683	0.363	0	Proliferative T cells	SET
0	0.413193	0.551	0.226	0	Proliferative T cells	SNRPC
0	0.414105	0.307	0.054	0	Proliferative T cells	MTHFD1
0	0.414468	0.58	0.226	0	Proliferative T cells	MZT2A
0	0.415151	0.634	0.302	0	Proliferative T cells	SNRPD3
0	0.415286	0.246	0.019	0	Proliferative T cells	ATAD5
0	0.415766	0.751	0.417	0	Proliferative T cells	PSMB8
0	0.416339	0.216	0.005	0	Proliferative T cells	DTL
0	0.417937	0.699	0.355	0	Proliferative T cells	WDR1
0	0.418186	0.58	0.26	0	Proliferative T cells	ILF2
0	0.418828	0.421	0.123	0	Proliferative T cells	MZT1
0	0.419641	0.589	0.279	0	Proliferative T cells	BANF1
0	0.421254	0.197	0.003	0	Proliferative T cells	KIF15
0	0.422044	0.848	0.654	0	Proliferative T cells	NPM1
0	0.422073	0.658	0.327	0	Proliferative T cells	PSMD8
0	0.424033	0.835	0.594	0	Proliferative T cells	SUMO2
0	0.425069	0.198	0.005	0	Proliferative T cells	FAM111B
0	0.427229	0.646	0.314	0	Proliferative T cells	RALY
0	0.42831	0.718	0.377	0	Proliferative T cells	IFI16
0	0.429684	0.43	0.13	0	Proliferative T cells	UQCC2
0	0.430512	0.322	0.072	0	Proliferative T cells	UBE2S
0	0.431676	0.239	0.013	0	Proliferative T cells	BRCA1
0	0.431884	0.355	0.088	0	Proliferative T cells	FAM111A
0	0.43194	0.609	0.271	0	Proliferative T cells	HNRNPR
0	0.432409	0.518	0.205	0	Proliferative T cells	PDCD5
0	0.432608	0.227	0.006	0	Proliferative T cells	KIF23
0	0.432981	0.4	0.133	0	Proliferative T cells	NUCB2
0	0.433314	0.498	0.169	0	Proliferative T cells	RBBP7
0	0.433577	0.231	0.007	0	Proliferative T cells	CDCA3
0	0.434873	0.267	0.025	0	Proliferative T cells	WDR76
0	0.435252	0.742	0.413	0	Proliferative T cells	LY6E
0	0.4357	0.229	0.005	0	Proliferative T cells	KIF2C
0	0.435838	0.473	0.156	0	Proliferative T cells	HPRT1
0	0.437572	0.27	0.015	0	Proliferative T cells	ORC6
0	0.439315	0.623	0.303	0	Proliferative T cells	VDAC1
0	0.439749	0.774	0.487	0	Proliferative T cells	COTL1
0	0.442226	0.721	0.401	0	Proliferative T cells	UQCRQ
0	0.442905	0.221	0.005	0	Proliferative T cells	HJURP
0	0.445037	0.787	0.477	0	Proliferative T cells	SRSF3
0	0.445984	0.807	0.484	0	Proliferative T cells	PSMB9
0	0.447207	0.356	0.065	0	Proliferative T cells	YEATS4
0	0.447875	0.276	0.025	0	Proliferative T cells	RACGAP1
0	0.447879	0.265	0.018	0	Proliferative T cells	CCDC34
0	0.448889	0.8	0.466	0	Proliferative T cells	PSME2
0	0.449681	0.515	0.207	0	Proliferative T cells	MTHFD2
0	0.449773	0.674	0.316	0	Proliferative T cells	BUB3
0	0.449913	0.661	0.31	0	Proliferative T cells	ITM2A
0	0.450645	0.925	0.697	0	Proliferative T cells	ARPC2
0	0.450861	0.4	0.109	0	Proliferative T cells	CDK4
0	0.451115	0.272	0.014	0	Proliferative T cells	CHEK1
0	0.451999	0.349	0.066	0	Proliferative T cells	CDCA4
0	0.45299	0.424	0.115	0	Proliferative T cells	STRA13
0	0.453403	0.555	0.225	0	Proliferative T cells	HNRNPD
0	0.45394	0.375	0.085	0	Proliferative T cells	TACC3
0	0.456021	0.335	0.041	0	Proliferative T cells	ACOT7
0	0.456176	0.785	0.479	0	Proliferative T cells	LDHB
0	0.456213	0.605	0.259	0	Proliferative T cells	PSMB2
0	0.458896	0.32	0.04	0	Proliferative T cells	RFC4
0	0.459419	0.565	0.238	0	Proliferative T cells	SNRPE
0	0.45976	0.532	0.188	0	Proliferative T cells	NUDT21
0	0.460135	0.703	0.378	0	Proliferative T cells	ANXA5
0	0.461502	0.507	0.157	0	Proliferative T cells	FDPS
0	0.462648	0.236	0.004	0	Proliferative T cells	SPC25
0	0.46448	0.427	0.103	0	Proliferative T cells	EBP
0	0.466588	0.256	0.012	0	Proliferative T cells	RAD51AP1
0	0.466829	0.428	0.108	0	Proliferative T cells	MAD2L2
0	0.466977	0.678	0.341	0	Proliferative T cells	SRP9
0	0.467427	0.695	0.351	0	Proliferative T cells	RBX1
0	0.46757	0.861	0.593	0	Proliferative T cells	SUB1
0	0.467643	0.849	0.606	0	Proliferative T cells	YBX1
0	0.471643	0.243	0.006	0	Proliferative T cells	TROAP
0	0.471822	0.532	0.212	0	Proliferative T cells	PRDX3
0	0.472685	0.299	0.025	0	Proliferative T cells	WDR34
0	0.472945	0.682	0.354	0	Proliferative T cells	ERH
0	0.474578	0.618	0.241	0	Proliferative T cells	MZT2B
0	0.47506	0.654	0.315	0	Proliferative T cells	TPM4
0	0.478375	0.254	0.006	0	Proliferative T cells	CKAP2L
0	0.481481	0.266	0.022	0	Proliferative T cells	FBXO5
0	0.48302	0.325	0.04	0	Proliferative T cells	HIRIP3
0	0.484531	0.775	0.434	0	Proliferative T cells	PPP1CA
0	0.485314	0.25	0.008	0	Proliferative T cells	CEP55
0	0.490565	0.863	0.626	0	Proliferative T cells	CHCHD2
0	0.492966	0.232	0.008	0	Proliferative T cells	HMMR
0	0.493183	0.322	0.035	0	Proliferative T cells	LIG1
0	0.49517	0.901	0.661	0	Proliferative T cells	HNRNPA2B1
0	0.496078	0.747	0.429	0	Proliferative T cells	HNRNPF
0	0.497368	0.85	0.542	0	Proliferative T cells	LDHA
0	0.497446	0.475	0.131	0	Proliferative T cells	SSRP1
0	0.49774	0.638	0.253	0	Proliferative T cells	H2AFY
0	0.499378	0.807	0.52	0	Proliferative T cells	COX6C
0	0.50018	0.561	0.216	0	Proliferative T cells	DDX39A
0	0.501289	0.99	0.9	0	Proliferative T cells	PTMA
0	0.50194	0.584	0.222	0	Proliferative T cells	LSM3
0	0.502301	0.673	0.313	0	Proliferative T cells	PA2G4
0	0.50403	0.791	0.462	0	Proliferative T cells	PARK7
0	0.504269	0.66	0.293	0	Proliferative T cells	SNRPF
0	0.505561	0.24	0.005	0	Proliferative T cells	CENPA
0	0.505883	0.488	0.178	0	Proliferative T cells	LAG3
0	0.505889	0.525	0.162	0	Proliferative T cells	HSPB11
0	0.506874	0.29	0.017	0	Proliferative T cells	FANCI
0	0.51028	0.319	0.022	0	Proliferative T cells	CENPH
0	0.510771	0.266	0.008	0	Proliferative T cells	NUF2
0	0.510848	0.309	0.029	0	Proliferative T cells	GGH
0	0.511409	0.447	0.121	0	Proliferative T cells	SMC1A
0	0.512722	0.437	0.097	0	Proliferative T cells	CBX5
0	0.513474	0.695	0.435	0	Proliferative T cells	ATP5G3
0	0.513888	0.301	0.028	0	Proliferative T cells	HMGB3
0	0.513947	0.625	0.263	0	Proliferative T cells	PSMA4
0	0.514981	0.263	0.008	0	Proliferative T cells	NCAPG
0	0.51698	0.222	0.007	0	Proliferative T cells	PLK1
0	0.51718	0.967	0.823	0	Proliferative T cells	CFL1
0	0.518474	0.333	0.027	0	Proliferative T cells	CENPN
0	0.518479	0.463	0.179	0	Proliferative T cells	TUBA1C
0	0.521916	0.363	0.048	0	Proliferative T cells	RNASEH2A
0	0.52251	0.293	0.021	0	Proliferative T cells	NDC80
0	0.526075	0.611	0.261	0	Proliferative T cells	MRPL51
0	0.527161	0.849	0.599	0	Proliferative T cells	CORO1A
0	0.531984	0.542	0.182	0	Proliferative T cells	PSMC3
0	0.533607	0.286	0.006	0	Proliferative T cells	UHRF1
0	0.533751	0.279	0.005	0	Proliferative T cells	PKMYT1
0	0.536615	0.565	0.211	0	Proliferative T cells	LSM5
0	0.541061	0.522	0.142	0	Proliferative T cells	CCDC167
0	0.542874	0.589	0.202	0	Proliferative T cells	LSM2
0	0.546966	0.274	0.011	0	Proliferative T cells	KIF11
0	0.547083	0.668	0.302	0	Proliferative T cells	ANAPC11
0	0.549612	0.463	0.103	0	Proliferative T cells	SAE1
0	0.551359	0.388	0.073	0	Proliferative T cells	SNRNP25
0	0.552798	0.588	0.29	0	Proliferative T cells	HN1
0	0.555544	0.718	0.355	0	Proliferative T cells	YWHAQ
0	0.558972	0.325	0.014	0	Proliferative T cells	CENPU
0	0.5603	0.535	0.198	0	Proliferative T cells	FABP5
0	0.560927	0.719	0.394	0	Proliferative T cells	SNRPG
0	0.563612	0.297	0.016	0	Proliferative T cells	PRC1
0	0.564207	0.537	0.2	0	Proliferative T cells	SLBP
0	0.565694	0.373	0.073	0	Proliferative T cells	KIF20B
0	0.56592	0.302	0.009	0	Proliferative T cells	KIFC1
0	0.566347	0.584	0.29	0	Proliferative T cells	TUBB4B
0	0.568266	0.366	0.042	0	Proliferative T cells	GMNN
0	0.568666	0.245	0.017	0	Proliferative T cells	CCNB1
0	0.568807	0.62	0.267	0	Proliferative T cells	RAD21
0	0.569047	0.37	0.035	0	Proliferative T cells	CENPK
0	0.571708	0.286	0.008	0	Proliferative T cells	CDCA8
0	0.573478	0.462	0.095	0	Proliferative T cells	SKA2
0	0.574322	0.543	0.167	0	Proliferative T cells	SMC3
0	0.575254	0.829	0.5	0	Proliferative T cells	HMGN1
0	0.575412	0.396	0.069	0	Proliferative T cells	MCM6
0	0.580603	0.321	0.017	0	Proliferative T cells	TCF19
0	0.583573	0.252	0.004	0	Proliferative T cells	DLGAP5
0	0.587228	0.347	0.036	0	Proliferative T cells	CDCA7
0	0.588811	0.308	0.008	0	Proliferative T cells	CDT1
0	0.593663	0.538	0.171	0	Proliferative T cells	HNRNPAB
0	0.593956	0.743	0.391	0	Proliferative T cells	COX5A
0	0.603161	0.437	0.084	0	Proliferative T cells	LMNB1
0	0.604038	0.889	0.715	0	Proliferative T cells	PPIA
0	0.604238	0.425	0.061	0	Proliferative T cells	DTYMK
0	0.60764	0.261	0.015	0	Proliferative T cells	CENPE
0	0.609552	0.642	0.259	0	Proliferative T cells	SIVA1
0	0.610201	0.426	0.061	0	Proliferative T cells	PHF19
0	0.611006	0.319	0.015	0	Proliferative T cells	MCM2
0	0.61173	0.362	0.025	0	Proliferative T cells	DHFR
0	0.611819	0.977	0.838	0	Proliferative T cells	ACTG1
0	0.612081	0.997	0.955	0	Proliferative T cells	ACTB
0	0.614863	0.596	0.206	0	Proliferative T cells	LSM4
0	0.615039	0.653	0.376	0	Proliferative T cells	PGAM1
0	0.615675	0.479	0.115	0	Proliferative T cells	USP1
0	0.617517	0.618	0.22	0	Proliferative T cells	IDH2
0	0.617859	0.412	0.063	0	Proliferative T cells	RRM1
0	0.620091	0.316	0.005	0	Proliferative T cells	CDCA5
0	0.629828	0.351	0.034	0	Proliferative T cells	HELLS
0	0.633762	0.446	0.139	0	Proliferative T cells	KPNA2
0	0.634198	0.299	0.007	0	Proliferative T cells	GTSE1
0	0.638672	0.722	0.307	0	Proliferative T cells	CBX3
0	0.63876	0.849	0.521	0	Proliferative T cells	ENO1
0	0.64147	0.853	0.494	0	Proliferative T cells	COX8A
0	0.643221	0.454	0.086	0	Proliferative T cells	KIF22
0	0.644169	0.785	0.387	0	Proliferative T cells	SNRPB
0	0.64474	0.377	0.025	0	Proliferative T cells	CENPW
0	0.646481	0.418	0.061	0	Proliferative T cells	EZH2
0	0.650026	0.352	0.024	0	Proliferative T cells	MCM4
0	0.653495	0.56	0.149	0	Proliferative T cells	DNMT1
0	0.655003	0.824	0.48	0	Proliferative T cells	PKM
0	0.655696	0.664	0.248	0	Proliferative T cells	SNRPD1
0	0.662693	0.394	0.045	0	Proliferative T cells	ATAD2
0	0.667707	0.301	0.008	0	Proliferative T cells	CCNB2
0	0.6729	0.392	0.119	0	Proliferative T cells	HIST1H1C
0	0.673508	0.574	0.169	0	Proliferative T cells	C12orf75
0	0.67559	0.789	0.36	0	Proliferative T cells	CALM3
0	0.678242	0.975	0.852	0	Proliferative T cells	PFN1
0	0.679327	0.6	0.193	0	Proliferative T cells	NASP
0	0.681096	0.534	0.23	0	Proliferative T cells	GZMB
0	0.681148	0.339	0.012	0	Proliferative T cells	GINS2
0	0.683929	0.277	0.008	0	Proliferative T cells	CDC20
0	0.687083	0.311	0.008	0	Proliferative T cells	AURKB
0	0.688882	0.567	0.149	0	Proliferative T cells	CARHSP1
0	0.69519	0.705	0.263	0	Proliferative T cells	NUCKS1
0	0.700192	0.529	0.096	0	Proliferative T cells	NUDT1
0	0.701371	0.521	0.106	0	Proliferative T cells	DNAJC9
0	0.708382	0.658	0.325	0	Proliferative T cells	GZMA
0	0.71305	0.604	0.168	0	Proliferative T cells	RPA3
0	0.715158	0.797	0.457	0	Proliferative T cells	SLC25A5
0	0.721581	0.408	0.03	0	Proliferative T cells	UBE2T
0	0.727222	0.36	0.016	0	Proliferative T cells	CDKN3
0	0.737992	0.499	0.135	0	Proliferative T cells	H2AFX
0	0.73844	0.58	0.16	0	Proliferative T cells	ANP32E
0	0.742208	0.851	0.51	0	Proliferative T cells	RAN
0	0.742686	0.481	0.071	0	Proliferative T cells	MCM3
0	0.75655	0.859	0.539	0	Proliferative T cells	TPI1
0	0.765305	0.799	0.403	0	Proliferative T cells	ANP32B
0	0.766075	0.332	0.083	0	Proliferative T cells	HIST1H1D
0	0.768604	0.499	0.089	0	Proliferative T cells	MCM5
0	0.773372	0.436	0.032	0	Proliferative T cells	MAD2L1
0	0.776589	0.454	0.042	0	Proliferative T cells	CENPM
0	0.777028	0.4	0.012	0	Proliferative T cells	ASF1B
0	0.782531	0.425	0.035	0	Proliferative T cells	FEN1
0	0.795639	0.352	0.01	0	Proliferative T cells	CCNA2
0	0.803603	0.492	0.069	0	Proliferative T cells	TMEM106C
0	0.804421	0.391	0.015	0	Proliferative T cells	CLSPN
0	0.809723	0.584	0.202	0	Proliferative T cells	CKS2
0	0.823887	0.474	0.049	0	Proliferative T cells	SMC2
0	0.825754	0.832	0.468	0	Proliferative T cells	MT2A
0	0.828798	0.611	0.159	0	Proliferative T cells	TMPO
0	0.837174	0.253	0.011	0	Proliferative T cells	HIST1H1B
0	0.843853	0.756	0.346	0	Proliferative T cells	H2AFV
0	0.844963	0.376	0.104	0	Proliferative T cells	HIST1H1E
0	0.84843	0.987	0.847	0	Proliferative T cells	GAPDH
0	0.862658	0.704	0.248	0	Proliferative T cells	RANBP1
0	0.866109	0.394	0.124	0	Proliferative T cells	CXCL13
0	0.873468	0.397	0.015	0	Proliferative T cells	TPX2
0	0.878924	0.45	0.014	0	Proliferative T cells	ZWINT
0	0.906902	0.802	0.324	0	Proliferative T cells	DEK
0	0.923246	0.455	0.131	0	Proliferative T cells	MT1E
0	0.927935	0.353	0.009	0	Proliferative T cells	ASPM
0	0.944636	0.408	0.01	0	Proliferative T cells	BIRC5
0	0.946941	0.538	0.072	0	Proliferative T cells	MCM7
0	0.961626	0.6	0.128	0	Proliferative T cells	PTTG1
0	0.964291	0.604	0.135	0	Proliferative T cells	SMC4
0	0.970996	0.513	0.07	0	Proliferative T cells	CKS1B
0	0.987023	0.423	0.016	0	Proliferative T cells	CDK1
0	1.00535	0.921	0.641	0	Proliferative T cells	HMGB1
0	1.01545	0.462	0.015	0	Proliferative T cells	TK1
0	1.0539	0.411	0.017	0	Proliferative T cells	KIAA0101
0	1.16267	0.725	0.227	0	Proliferative T cells	DUT
0	1.18207	0.448	0.03	0	Proliferative T cells	CENPF
0	1.18454	0.865	0.472	0	Proliferative T cells	H2AFZ
0	1.19485	0.52	0.039	0	Proliferative T cells	NUSAP1
0	1.20427	0.614	0.09	0	Proliferative T cells	PCNA
0	1.31195	0.765	0.453	0	Proliferative T cells	HMGN2
0	1.3261	0.445	0.011	0	Proliferative T cells	UBE2C
0	1.32628	0.467	0.017	0	Proliferative T cells	TOP2A
0	1.40719	0.468	0.009	0	Proliferative T cells	RRM2
0	1.47681	0.549	0.015	0	Proliferative T cells	MKI67
0	1.51657	0.852	0.333	0	Proliferative T cells	HMGB2
0	1.53073	0.879	0.436	0	Proliferative T cells	TUBA1B
0	1.53754	0.611	0.018	0	Proliferative T cells	TYMS
0	1.59376	0.855	0.384	0	Proliferative T cells	TUBB
0	1.96957	0.698	0.319	0	Proliferative T cells	HIST1H4C
0	2.10976	0.844	0.152	0	Proliferative T cells	STMN1
5.08274e-308	0.354562	0.482	0.207	4.45548e-303	Proliferative T cells	CYC1
8.56459e-308	0.259188	0.298	0.083	7.50764e-303	Proliferative T cells	RUVBL2
8.6086e-308	0.27559	0.36	0.117	7.54621e-303	Proliferative T cells	MRPL27
1.42069e-307	0.293471	0.225	0.039	1.24536e-302	Proliferative T cells	TTF2
1.67488e-307	0.295266	0.245	0.054	1.46818e-302	Proliferative T cells	SCCPDH
4.48378e-307	0.254265	0.413	0.156	3.93044e-302	Proliferative T cells	SNRPA1
6.4491e-307	0.2877	0.39	0.137	5.65322e-302	Proliferative T cells	RFC1
7.39282e-307	0.313892	0.585	0.279	6.48048e-302	Proliferative T cells	NONO
2.97815e-305	0.29335	0.759	0.482	2.61062e-300	Proliferative T cells	SRSF2
5.42018e-305	0.328613	0.528	0.244	4.75128e-300	Proliferative T cells	RBM17
7.10988e-305	0.339114	0.556	0.263	6.23245e-300	Proliferative T cells	HP1BP3
1.00197e-304	0.304731	0.861	0.612	8.78315e-300	Proliferative T cells	CLIC1
7.77774e-304	0.283405	0.56	0.275	6.81789e-299	Proliferative T cells	RBMX
2.25686e-303	0.290361	0.37	0.129	1.97834e-298	Proliferative T cells	FKBP3
1.10029e-302	0.254611	0.169	0.016	9.64503e-298	Proliferative T cells	SPDL1
3.35254e-301	0.347497	0.749	0.487	2.9388e-296	Proliferative T cells	UQCRH
4.28278e-301	0.282902	0.524	0.241	3.75425e-296	Proliferative T cells	VPS29
1.00817e-300	0.28732	0.493	0.216	8.83751e-296	Proliferative T cells	NAA38
4.76522e-300	0.293226	0.424	0.167	4.17715e-295	Proliferative T cells	UBA2
1.75412e-299	0.266809	0.165	0.014	1.53765e-294	Proliferative T cells	PAQR4
2.29473e-299	0.368664	0.662	0.381	2.01154e-294	Proliferative T cells	RPS27L
2.39506e-299	0.261925	0.184	0.022	2.09949e-294	Proliferative T cells	ZWILCH
9.71079e-298	0.401204	0.385	0.15	8.51238e-293	Proliferative T cells	ENTPD1
1.16393e-297	0.397216	0.913	0.719	1.02029e-292	Proliferative T cells	VIM
1.55771e-297	0.306076	0.628	0.333	1.36547e-292	Proliferative T cells	HNRNPM
2.16332e-297	0.251422	0.329	0.105	1.89634e-292	Proliferative T cells	ACAA2
2.4037e-296	0.272959	0.299	0.085	2.10706e-291	Proliferative T cells	CBX1
3.22212e-296	0.281424	0.494	0.214	2.82448e-291	Proliferative T cells	SUMO3
1.44399e-295	0.350784	0.494	0.225	1.26579e-290	Proliferative T cells	RHEB
2.78625e-295	0.258611	0.47	0.19	2.4424e-290	Proliferative T cells	SH2D1A
3.83081e-295	0.257782	0.165	0.016	3.35805e-290	Proliferative T cells	KNSTRN
8.60751e-295	0.259011	0.418	0.163	7.54526e-290	Proliferative T cells	ASNA1
1.41604e-294	0.287355	0.398	0.148	1.24129e-289	Proliferative T cells	GLO1
1.51734e-294	0.265893	0.498	0.221	1.33008e-289	Proliferative T cells	ARPP19
4.2082e-294	0.330593	0.502	0.225	3.68887e-289	Proliferative T cells	CCT5
6.10929e-294	0.283984	0.445	0.181	5.35535e-289	Proliferative T cells	BTG3
6.3312e-294	0.310041	0.569	0.292	5.54986e-289	Proliferative T cells	AURKAIP1
1.28507e-293	0.26944	0.397	0.149	1.12648e-288	Proliferative T cells	MRPS16
1.54053e-293	0.370874	0.845	0.612	1.35042e-288	Proliferative T cells	CALM2
1.82185e-293	0.335093	0.605	0.331	1.59702e-288	Proliferative T cells	NDUFB9
1.9618e-293	0.253466	0.374	0.134	1.7197e-288	Proliferative T cells	GLRX3
3.27546e-293	0.255602	0.153	0.01	2.87123e-288	Proliferative T cells	ECT2
6.46083e-293	0.338096	0.538	0.261	5.6635e-288	Proliferative T cells	PPA1
1.46807e-292	0.304033	0.624	0.334	1.2869e-287	Proliferative T cells	EID1
2.39742e-292	0.271473	0.545	0.262	2.10156e-287	Proliferative T cells	KHDRBS1
2.54208e-292	0.256245	0.446	0.184	2.22836e-287	Proliferative T cells	TMEM109
3.32726e-292	0.296134	0.638	0.341	2.91664e-287	Proliferative T cells	TAP1
6.22426e-292	0.341764	0.856	0.615	5.45612e-287	Proliferative T cells	PPDPF
8.68982e-292	0.32402	0.746	0.453	7.61741e-287	Proliferative T cells	ACTR3
9.25692e-292	0.301821	0.618	0.333	8.11452e-287	Proliferative T cells	ABRACL
3.36772e-291	0.261983	0.332	0.109	2.95211e-286	Proliferative T cells	TPRKB
5.12127e-291	0.348016	0.661	0.375	4.48925e-286	Proliferative T cells	PLP2
2.07563e-290	0.275918	0.665	0.373	1.81947e-285	Proliferative T cells	TRAPPC1
7.48999e-289	0.337573	0.744	0.475	6.56565e-284	Proliferative T cells	RBM3
1.21105e-288	0.271729	0.507	0.24	1.06159e-283	Proliferative T cells	DCXR
1.88418e-288	0.266593	0.548	0.264	1.65166e-283	Proliferative T cells	PSMC5
4.38351e-288	0.267996	0.567	0.285	3.84255e-283	Proliferative T cells	NDUFB7
1.25032e-287	0.267254	0.54	0.264	1.09602e-282	Proliferative T cells	BAX
4.94999e-287	0.267188	0.505	0.232	4.33911e-282	Proliferative T cells	ACP1
1.98044e-286	0.273215	0.528	0.248	1.73603e-281	Proliferative T cells	ILF3
4.16344e-286	0.40636	0.215	0.043	3.64963e-281	Proliferative T cells	HIST2H2AC
7.46953e-286	0.311065	0.868	0.588	6.54772e-281	Proliferative T cells	IL32
8.8789e-286	0.260593	0.437	0.18	7.78316e-281	Proliferative T cells	TXN2
1.27498e-285	0.325798	0.701	0.43	1.11764e-280	Proliferative T cells	NDUFB2
2.71137e-285	0.286737	0.566	0.29	2.37676e-280	Proliferative T cells	UBE2L3
4.3607e-285	0.290014	0.513	0.235	3.82254e-280	Proliferative T cells	SRSF4
9.6178e-285	0.279508	0.492	0.215	8.43087e-280	Proliferative T cells	PSMB7
1.45968e-284	0.285724	0.485	0.214	1.27954e-279	Proliferative T cells	PCMT1
1.64929e-284	0.28268	0.525	0.254	1.44575e-279	Proliferative T cells	MRPL52
3.26484e-284	0.263192	0.424	0.167	2.86193e-279	Proliferative T cells	RPA2
2.43328e-283	0.273377	0.566	0.285	2.13299e-278	Proliferative T cells	MDH2
5.59402e-283	0.279506	0.573	0.292	4.90366e-278	Proliferative T cells	RAD23A
1.00299e-282	0.272912	0.316	0.094	8.79209e-278	Proliferative T cells	DBF4
1.01866e-281	0.282149	0.558	0.277	8.9295e-277	Proliferative T cells	PPP1CC
1.89046e-281	0.256608	0.519	0.24	1.65716e-276	Proliferative T cells	BATF
3.86561e-281	0.287403	0.871	0.648	3.38856e-276	Proliferative T cells	RHOA
5.39206e-281	0.309524	0.703	0.43	4.72663e-276	Proliferative T cells	NDUFB11
3.66552e-280	0.500344	0.577	0.302	3.21316e-275	Proliferative T cells	ARL6IP1
9.29395e-280	0.267837	0.51	0.237	8.14698e-275	Proliferative T cells	TMEM14B
1.18547e-278	0.25589	0.195	0.031	1.03917e-273	Proliferative T cells	PRIM1
1.72245e-278	0.299668	0.808	0.491	1.50988e-273	Proliferative T cells	CD3D
2.1357e-278	0.261867	0.451	0.197	1.87213e-273	Proliferative T cells	NDUFV1
5.24095e-278	0.29535	0.429	0.184	4.59417e-273	Proliferative T cells	TMEM14C
5.77975e-278	0.255121	0.265	0.07	5.06647e-273	Proliferative T cells	HMGXB4
2.37613e-277	0.251428	0.409	0.158	2.08289e-272	Proliferative T cells	CDC123
5.63881e-277	0.282056	0.699	0.418	4.94292e-272	Proliferative T cells	PSMB1
1.28754e-276	0.308797	0.537	0.267	1.12864e-271	Proliferative T cells	CCT6A
1.82702e-276	0.303071	0.56	0.277	1.60154e-271	Proliferative T cells	CCT8
2.08564e-276	0.301029	0.53	0.252	1.82825e-271	Proliferative T cells	MAGOH
3.10177e-276	0.348951	0.75	0.481	2.71898e-271	Proliferative T cells	NCL
3.18177e-276	0.261338	0.585	0.301	2.78911e-271	Proliferative T cells	EWSR1
1.1949e-275	0.278207	0.794	0.551	1.04744e-270	Proliferative T cells	COX6B1
2.14694e-275	0.304832	0.636	0.348	1.88198e-270	Proliferative T cells	XRCC6
3.3091e-275	0.365733	0.456	0.206	2.90072e-270	Proliferative T cells	HMGA1
3.73766e-275	0.330442	0.622	0.337	3.2764e-270	Proliferative T cells	PRDX5
3.88646e-275	0.289112	0.502	0.236	3.40684e-270	Proliferative T cells	PSMD7
1.818e-274	0.266419	0.475	0.219	1.59364e-269	Proliferative T cells	PHB
5.85308e-273	0.295352	0.129	0.003	5.13075e-268	Proliferative T cells	HIST1H3B
6.13295e-273	0.322517	0.641	0.352	5.37609e-268	Proliferative T cells	CACYBP
1.75296e-272	0.264084	0.572	0.282	1.53663e-267	Proliferative T cells	DUSP4
3.13077e-272	0.278088	0.804	0.516	2.7444e-267	Proliferative T cells	ARPC1B
6.2518e-272	0.289124	0.523	0.248	5.48026e-267	Proliferative T cells	TCP1
7.85379e-272	0.269446	0.663	0.364	6.88455e-267	Proliferative T cells	DRAP1
1.65332e-271	0.324718	0.691	0.416	1.44928e-266	Proliferative T cells	COX7B
2.175e-271	0.376403	0.617	0.361	1.90658e-266	Proliferative T cells	ATP5J
3.18957e-271	0.331975	0.623	0.362	2.79594e-266	Proliferative T cells	PSMB3
9.05681e-271	0.261673	0.429	0.178	7.93911e-266	Proliferative T cells	NDUFS3
2.88521e-270	0.284968	0.611	0.334	2.52914e-265	Proliferative T cells	NDUFB10
4.15478e-270	0.325776	0.839	0.633	3.64204e-265	Proliferative T cells	HINT1
7.27144e-270	0.281346	0.54	0.258	6.37407e-265	Proliferative T cells	SLC9A3R1
1.3803e-269	0.25139	0.75	0.482	1.20996e-264	Proliferative T cells	CAPZB
2.45418e-269	0.267245	0.538	0.266	2.15131e-264	Proliferative T cells	NUDC
3.28094e-268	0.305223	0.517	0.253	2.87604e-263	Proliferative T cells	HMGN3
3.87487e-268	0.251974	0.374	0.137	3.39667e-263	Proliferative T cells	NUDCD2
9.11244e-268	0.262038	0.497	0.23	7.98788e-263	Proliferative T cells	PSMD4
4.33121e-267	0.304092	0.577	0.308	3.7967e-262	Proliferative T cells	ATP5C1
1.53977e-266	0.259269	0.36	0.13	1.34974e-261	Proliferative T cells	RECQL
2.59761e-266	0.35121	0.379	0.151	2.27704e-261	Proliferative T cells	PTMS
1.57293e-265	0.299853	0.4	0.16	1.37882e-260	Proliferative T cells	IMPDH2
5.57229e-265	0.279457	0.626	0.35	4.88462e-260	Proliferative T cells	SUMO1
8.58693e-265	0.26302	0.56	0.28	7.52722e-260	Proliferative T cells	SRI
1.03796e-264	0.295394	0.641	0.365	9.09865e-260	Proliferative T cells	ARL6IP4
1.18981e-264	0.296683	0.607	0.321	1.04298e-259	Proliferative T cells	PRDX6
1.85346e-264	0.257707	0.274	0.075	1.62472e-259	Proliferative T cells	TESC
4.17534e-264	0.305514	0.624	0.352	3.66006e-259	Proliferative T cells	ATPIF1
1.10437e-263	0.262821	0.558	0.275	9.6808e-259	Proliferative T cells	DNAJC8
1.4734e-263	0.346349	0.868	0.716	1.29156e-258	Proliferative T cells	HNRNPA1
2.60112e-263	0.281952	0.5	0.237	2.28012e-258	Proliferative T cells	IFI6
1.26141e-261	0.280505	0.525	0.253	1.10574e-256	Proliferative T cells	PSMA1
1.33607e-261	0.291754	0.489	0.229	1.17118e-256	Proliferative T cells	CCT2
4.49413e-261	0.264081	0.8	0.554	3.93951e-256	Proliferative T cells	SNRPD2
1.01407e-260	0.27482	0.347	0.126	8.88927e-256	Proliferative T cells	PDCD1
1.04873e-260	0.272806	0.572	0.294	9.19305e-256	Proliferative T cells	EIF3I
9.66806e-260	0.255032	0.609	0.343	8.47492e-255	Proliferative T cells	ROMO1
1.35124e-259	0.291608	0.21	0.045	1.18448e-254	Proliferative T cells	UNG
1.05649e-257	0.253227	0.414	0.167	9.26105e-253	Proliferative T cells	MRPS15
1.77903e-257	0.277063	0.527	0.265	1.55948e-252	Proliferative T cells	POLR2E
5.85356e-256	0.327807	0.659	0.417	5.13117e-251	Proliferative T cells	ATP5J2
8.45758e-256	0.257124	0.683	0.424	7.41383e-251	Proliferative T cells	UBE2D2
9.59547e-256	0.285397	0.539	0.27	8.41129e-251	Proliferative T cells	ADRM1
1.07373e-255	0.252927	0.181	0.029	9.41219e-251	Proliferative T cells	SLC27A2
4.94372e-255	0.262922	0.497	0.234	4.33361e-250	Proliferative T cells	MRPS34
2.98354e-254	0.398688	0.353	0.13	2.61534e-249	Proliferative T cells	IFNG
4.53409e-254	0.251984	0.53	0.254	3.97454e-249	Proliferative T cells	ANP32A
1.00383e-253	0.270921	0.466	0.203	8.7995e-249	Proliferative T cells	SRSF1
3.1357e-253	0.278782	0.394	0.16	2.74873e-248	Proliferative T cells	MIS18BP1
3.29292e-253	0.527389	0.415	0.182	2.88654e-248	Proliferative T cells	GNLY
6.15934e-253	0.257781	0.385	0.151	5.39922e-248	Proliferative T cells	PSMC2
7.50242e-253	0.254431	0.278	0.082	6.57655e-248	Proliferative T cells	EBNA1BP2
2.75878e-252	0.341336	0.597	0.344	2.41832e-247	Proliferative T cells	SHFM1
1.98004e-251	0.265518	0.617	0.343	1.73568e-246	Proliferative T cells	SF3B2
7.72253e-251	0.271243	0.788	0.545	6.7695e-246	Proliferative T cells	COX7A2
9.59726e-251	0.265668	0.339	0.129	8.41286e-246	Proliferative T cells	CDK6
1.0828e-249	0.283327	0.554	0.287	9.49169e-245	Proliferative T cells	CCT3
1.88584e-247	0.275368	0.256	0.074	1.6531e-242	Proliferative T cells	NDFIP2
2.19761e-247	0.285834	0.476	0.228	1.9264e-242	Proliferative T cells	SLIRP
2.04303e-246	0.251418	0.632	0.358	1.7909e-241	Proliferative T cells	C9orf16
6.60635e-246	0.262215	0.505	0.238	5.79106e-241	Proliferative T cells	RAB11A
4.66674e-244	0.260305	0.556	0.288	4.09082e-239	Proliferative T cells	SSBP1
8.89576e-242	0.259678	0.537	0.27	7.79793e-237	Proliferative T cells	LINC00152
1.12325e-240	0.377346	0.686	0.41	9.84627e-236	Proliferative T cells	CRIP1
2.51689e-240	0.274711	0.346	0.122	2.20628e-235	Proliferative T cells	C17orf49
9.65662e-240	0.263987	0.425	0.189	8.4649e-235	Proliferative T cells	DDT
1.26536e-238	0.275599	0.541	0.283	1.10921e-233	Proliferative T cells	UQCRFS1
1.33456e-236	0.250095	0.328	0.128	1.16987e-231	Proliferative T cells	GBP1
3.47046e-235	0.319931	0.491	0.253	3.04217e-230	Proliferative T cells	C1QBP
1.52121e-234	0.253537	0.622	0.352	1.33348e-229	Proliferative T cells	SEC11A
2.8472e-233	0.26992	0.728	0.468	2.49582e-228	Proliferative T cells	DYNLL1
4.32212e-233	0.251374	0.303	0.1	3.78873e-228	Proliferative T cells	MRPL17
7.67869e-230	0.252148	0.714	0.45	6.73107e-225	Proliferative T cells	TMEM258
1.55857e-229	0.252518	0.488	0.235	1.36623e-224	Proliferative T cells	GPI
8.08381e-229	0.282082	0.207	0.048	7.08618e-224	Proliferative T cells	MSH6
1.18118e-228	0.266409	0.768	0.511	1.03541e-223	Proliferative T cells	PGK1
6.38471e-228	0.274745	0.272	0.09	5.59677e-223	Proliferative T cells	MIR4435.2HG
3.28632e-226	0.292657	0.8	0.597	2.88076e-221	Proliferative T cells	ALDOA
5.5239e-224	0.260346	0.764	0.515	4.8422e-219	Proliferative T cells	HNRNPC
4.12623e-222	0.277859	0.11	0.004	3.61701e-217	Proliferative T cells	HIST1H3C
1.0291e-221	0.452983	0.774	0.594	9.02102e-217	Proliferative T cells	MIF
1.17505e-219	0.255063	0.485	0.251	1.03004e-214	Proliferative T cells	C20orf24
1.75513e-219	0.29975	0.72	0.53	1.53853e-214	Proliferative T cells	RAC2
3.43697e-219	0.310101	0.327	0.13	3.01282e-214	Proliferative T cells	MT1F
2.02189e-214	0.268125	0.557	0.32	1.77236e-209	Proliferative T cells	C14orf166
1.54919e-212	0.355254	0.385	0.172	1.35801e-207	Proliferative T cells	TNFRSF18
6.01629e-208	0.250982	0.272	0.094	5.27382e-203	Proliferative T cells	AHCY
6.46386e-204	0.34128	0.662	0.406	5.66616e-199	Proliferative T cells	GSTP1
1.00763e-194	0.415462	0.654	0.416	8.83281e-190	Proliferative T cells	LGALS1
2.19925e-194	0.348042	0.126	0.017	1.92784e-189	Proliferative T cells	HIST1H2AM
5.31174e-193	0.323868	0.317	0.139	4.65622e-188	Proliferative T cells	HAVCR2
2.33594e-192	0.283306	0.349	0.157	2.04766e-187	Proliferative T cells	NDUFC2
3.57253e-191	0.259603	0.481	0.247	3.13165e-186	Proliferative T cells	PSMA6
1.65274e-190	0.287117	0.55	0.323	1.44877e-185	Proliferative T cells	NDUFV2
3.11333e-189	0.339136	0.45	0.241	2.72911e-184	Proliferative T cells	CTSW
1.73502e-186	0.275744	0.646	0.433	1.52091e-181	Proliferative T cells	ATP5B
8.08137e-185	0.280039	0.477	0.251	7.08405e-180	Proliferative T cells	TCEB1
4.18934e-182	0.288047	0.254	0.099	3.67234e-177	Proliferative T cells	CD38
5.8182e-182	0.264047	0.133	0.021	5.10018e-177	Proliferative T cells	HIST1H2AG
1.25993e-179	0.282636	0.675	0.472	1.10444e-174	Proliferative T cells	CD99
1.91049e-178	0.295149	0.23	0.081	1.67472e-173	Proliferative T cells	PMF1
8.25119e-177	0.251579	0.583	0.344	7.23291e-172	Proliferative T cells	ATP5A1
3.1135e-176	0.279813	0.778	0.647	2.72926e-171	Proliferative T cells	ATP5L
2.66982e-174	0.27578	0.261	0.101	2.34034e-169	Proliferative T cells	AC092580.4
6.61016e-174	0.331049	0.853	0.663	5.7944e-169	Proliferative T cells	S100A4
3.79853e-169	0.265238	0.205	0.064	3.32975e-164	Proliferative T cells	CD70
7.19719e-159	0.295993	0.92	0.793	6.30899e-154	Proliferative T cells	RPSA
2.66633e-151	0.420932	0.424	0.224	2.33728e-146	Proliferative T cells	MT1X
8.09778e-148	0.694608	0.151	0.038	7.09843e-143	Proliferative T cells	MT1G
2.93195e-142	0.587297	0.185	0.07	2.57012e-137	Proliferative T cells	HMGB1P5
1.68622e-124	0.258515	0.303	0.155	1.47813e-119	Proliferative T cells	PSMA2
1.88812e-116	0.376664	0.584	0.464	1.65511e-111	Proliferative T cells	H3F3A
4.02612e-112	0.275143	0.135	0.043	3.52926e-107	Proliferative T cells	VCAM1
5.01413e-109	0.265709	0.183	0.072	4.39533e-104	Proliferative T cells	IL2RA
6.39866e-93	0.324395	0.104	0.031	5.609e-88	Proliferative T cells	ATP5MG
1.66198e-88	0.337298	0.109	0.037	1.45687e-83	Proliferative T cells	ENSG00000229164
3.74769e-84	0.297588	0.106	0.035	3.28519e-79	Proliferative T cells	ATP5F1E
1.51082e-83	0.354718	0.105	0.036	1.32437e-78	Proliferative T cells	ENSG00000161570
1.15087e-79	0.266324	0.12	0.047	1.00884e-74	Proliferative T cells	KLRC1
6.60186e-77	0.256218	0.122	0.05	5.78712e-72	Proliferative T cells	RP11.94L15.2
2.95296e-76	0.386431	0.152	0.072	2.58854e-71	Proliferative T cells	Z82188.1
9.28969e-76	0.288405	0.925	0.841	8.14325e-71	Proliferative T cells	RPLP0
2.04579e-57	0.272197	0.179	0.097	1.79332e-52	Proliferative T cells	PTMAP5
1.01654e-50	0.370886	0.443	0.324	8.91092e-46	Proliferative T cells	MTRNR2L8
1.331e-44	0.40719	0.547	0.434	1.16674e-39	Proliferative T cells	MTRNR2L12
1.88929e-41	0.251514	0.134	0.069	1.65613e-36	Proliferative T cells	MTATP8P1
4.33463e-41	0.482509	0.179	0.108	3.79969e-36	Proliferative T cells	RP11.475J5.4
5.82061e-41	0.469037	0.19	0.12	5.10229e-36	Proliferative T cells	RP5.857K21.7
1.06205e-40	0.469477	0.209	0.137	9.30981e-36	Proliferative T cells	TMSB4XP8
3.44383e-40	0.364438	0.175	0.107	3.01883e-35	Proliferative T cells	RP5.857K21.11
1.73683e-36	0.394649	0.185	0.117	1.52249e-31	Proliferative T cells	RP11.750B16.1
5.38311e-31	0.449002	0.259	0.191	4.71878e-26	Proliferative T cells	MTRNR2L1
8.9499e-24	0.412297	0.206	0.15	7.84539e-19	Proliferative T cells	hsa.mir.6723
4.47164e-19	0.328447	0.205	0.153	3.9198e-14	Proliferative T cells	MTND4P12
6.76535e-13	0.393786	0.255	0.213	5.93043e-08	Proliferative T cells	MTRNR2L2
2.15306e-08	0.384087	0.235	0.209	0.00188735	Proliferative T cells	MTATP6P1

## Sheet: Recently activated CD4 T cells
p_val	avg_logFC	pct.1	pct.2	p_val_adj	cluster	gene
0	0.275328	0.404	0.855	0	Recently activated CD4 T cells	RPL27A
0	0.28635	0.111	0.458	0	Recently activated CD4 T cells	GNAS
0	0.292321	0.191	0.538	0	Recently activated CD4 T cells	MT.ND3
0	0.32756	0.204	0.549	0	Recently activated CD4 T cells	MT.CYB
0	0.338119	0.101	0.353	0	Recently activated CD4 T cells	TRBC2
2.29226e-300	0.263545	0.087	0.319	2.00937e-295	Recently activated CD4 T cells	PTP4A2
4.08558e-284	0.393368	0.121	0.383	3.58138e-279	Recently activated CD4 T cells	JUND
4.93063e-282	0.471103	0.228	0.555	4.32214e-277	Recently activated CD4 T cells	MT.ND4
2.72981e-270	0.257986	0.08	0.292	2.39293e-265	Recently activated CD4 T cells	PIK3IP1
1.21893e-239	0.294176	0.171	0.462	1.0685e-234	Recently activated CD4 T cells	ATP5I
2.09952e-233	0.290337	0.185	0.474	1.84042e-228	Recently activated CD4 T cells	UQCR11
2.08644e-231	0.303985	0.192	0.481	1.82895e-226	Recently activated CD4 T cells	EVL
1.41658e-226	0.392188	0.101	0.315	1.24176e-221	Recently activated CD4 T cells	AES
4.54131e-219	0.398443	0.115	0.334	3.98087e-214	Recently activated CD4 T cells	ETS1
1.48984e-206	0.275155	0.136	0.367	1.30598e-201	Recently activated CD4 T cells	SNHG8
1.91177e-205	0.250494	0.062	0.228	1.67583e-200	Recently activated CD4 T cells	SUN2
2.84916e-191	0.289497	0.027	0.15	2.49755e-186	Recently activated CD4 T cells	TRBC1
1.13516e-181	0.367443	0.083	0.251	9.95067e-177	Recently activated CD4 T cells	PRF1
6.4401e-180	0.336138	0.04	0.17	5.64533e-175	Recently activated CD4 T cells	CD81
2.28123e-163	0.271119	0.292	0.619	1.9997e-158	Recently activated CD4 T cells	IFITM2
6.41189e-158	0.311763	0.26	0.563	5.6206e-153	Recently activated CD4 T cells	HCST
1.01114e-157	0.339913	0.045	0.167	8.86353e-153	Recently activated CD4 T cells	XIST
1.31309e-154	0.262927	0.123	0.317	1.15104e-149	Recently activated CD4 T cells	C9orf142
1.52547e-151	0.382429	0.096	0.261	1.33721e-146	Recently activated CD4 T cells	MZT2B
1.13079e-149	0.317449	0.373	0.715	9.91236e-145	Recently activated CD4 T cells	CXCR4
2.65303e-146	0.523758	0.045	0.156	2.32562e-141	Recently activated CD4 T cells	GPR171
2.44367e-144	0.324615	0.272	0.566	2.1421e-139	Recently activated CD4 T cells	NFKBIA
2.48889e-143	0.25272	0.121	0.303	2.18173e-138	Recently activated CD4 T cells	RGCC
5.71831e-142	0.253491	0.031	0.131	5.01261e-137	Recently activated CD4 T cells	CTDSP1
1.18079e-136	0.252018	0.019	0.108	1.03507e-131	Recently activated CD4 T cells	CD9
6.55647e-136	0.427794	0.149	0.332	5.74734e-131	Recently activated CD4 T cells	FOSB
6.53204e-134	0.516647	0.238	0.486	5.72592e-129	Recently activated CD4 T cells	IER2
8.93402e-131	0.280556	0.041	0.144	7.83147e-126	Recently activated CD4 T cells	TMSB4XP4
3.14088e-130	0.518538	0.304	0.592	2.75327e-125	Recently activated CD4 T cells	TXNIP
4.14791e-130	0.428124	0.03	0.125	3.63602e-125	Recently activated CD4 T cells	CEBPD
2.56715e-124	0.349288	0.19	0.392	2.25034e-119	Recently activated CD4 T cells	IL7R
3.29704e-124	0.3333	0.029	0.119	2.89015e-119	Recently activated CD4 T cells	UBALD2
2.22988e-123	0.288394	0.036	0.135	1.95469e-118	Recently activated CD4 T cells	TXNL4A
3.1073e-122	0.387461	0.216	0.456	2.72383e-117	Recently activated CD4 T cells	DDIT4
6.0191e-118	0.250161	0.489	0.839	5.27629e-113	Recently activated CD4 T cells	BTG1
9.52172e-118	0.258204	0.089	0.225	8.34665e-113	Recently activated CD4 T cells	CHMP1B
9.00065e-112	0.282107	0.063	0.17	7.88988e-107	Recently activated CD4 T cells	RPL3P4
5.02004e-106	0.335594	0.054	0.153	4.40051e-101	Recently activated CD4 T cells	RPL18AP3
2.4173e-101	0.337909	0.037	0.123	2.11898e-96	Recently activated CD4 T cells	TCF7
2.67072e-101	0.3388	0.094	0.221	2.34112e-96	Recently activated CD4 T cells	SERTAD1
9.07383e-99	0.268779	0.067	0.179	7.95403e-94	Recently activated CD4 T cells	NME3
5.242e-98	0.471781	0.065	0.167	4.59509e-93	Recently activated CD4 T cells	RP11.425L10.1
1.00078e-97	0.300995	0.068	0.17	8.77274e-93	Recently activated CD4 T cells	RPL13P12
1.64822e-96	0.469215	0.068	0.168	1.44482e-91	Recently activated CD4 T cells	KLRD1
2.84379e-94	0.440429	0.056	0.152	2.49284e-89	Recently activated CD4 T cells	H1FX
9.17645e-94	0.302517	0.067	0.174	8.04398e-89	Recently activated CD4 T cells	SNHG7
8.61469e-88	0.524902	0.122	0.263	7.55155e-83	Recently activated CD4 T cells	CITED2
1.86368e-82	0.318198	0.038	0.112	1.63368e-77	Recently activated CD4 T cells	AC007969.5
8.95553e-82	0.288028	0.097	0.211	7.85032e-77	Recently activated CD4 T cells	GZMM
1.22141e-81	0.339818	0.207	0.386	1.07068e-76	Recently activated CD4 T cells	IFITM3
1.48717e-79	0.305049	0.048	0.129	1.30364e-74	Recently activated CD4 T cells	RPL6P27
5.08496e-78	0.340688	0.101	0.215	4.45743e-73	Recently activated CD4 T cells	SNHG6
5.89702e-72	0.294789	0.059	0.147	5.16927e-67	Recently activated CD4 T cells	DDIT3
3.83683e-71	0.326466	0.068	0.162	3.36333e-66	Recently activated CD4 T cells	DGCR6L
2.47602e-70	0.326416	0.086	0.173	2.17046e-65	Recently activated CD4 T cells	RP11.234A1.1
1.83458e-66	0.329132	0.08	0.169	1.60817e-61	Recently activated CD4 T cells	AC016739.2
3.2386e-60	0.52675	0.1	0.196	2.83892e-55	Recently activated CD4 T cells	RPL13AP5
1.83182e-58	0.424556	0.049	0.114	1.60576e-53	Recently activated CD4 T cells	CTC.575D19.1
4.10865e-54	0.352571	0.055	0.114	3.6016e-49	Recently activated CD4 T cells	ATP5EP2
1.04233e-53	0.360479	0.056	0.126	9.13692e-49	Recently activated CD4 T cells	AC004453.8
3.2332e-51	0.936077	0.149	0.093	2.83419e-46	Recently activated CD4 T cells	RPS18P9
9.57605e-50	0.270408	0.062	0.128	8.39427e-45	Recently activated CD4 T cells	SELM
6.27189e-49	0.29415	0.083	0.166	5.49788e-44	Recently activated CD4 T cells	EGR1
3.74397e-48	0.551617	0.409	0.702	3.28193e-43	Recently activated CD4 T cells	ZFP36
6.83991e-48	0.555549	0.103	0.191	5.9958e-43	Recently activated CD4 T cells	KLF2
1.62626e-44	0.400141	0.109	0.197	1.42556e-39	Recently activated CD4 T cells	RPSAP58
6.12213e-44	0.431228	0.253	0.428	5.3666e-39	Recently activated CD4 T cells	CRIP1
6.60288e-43	0.412949	0.113	0.192	5.78801e-38	Recently activated CD4 T cells	CD8B
1.88891e-40	0.869285	0.085	0.153	1.6558e-35	Recently activated CD4 T cells	MT.RNR1
1.69905e-39	0.310823	0.062	0.119	1.48937e-34	Recently activated CD4 T cells	RP11.51O6.1
1.02792e-35	0.362093	0.055	0.108	9.01062e-31	Recently activated CD4 T cells	BCL3
2.00155e-34	0.319526	0.065	0.121	1.75454e-29	Recently activated CD4 T cells	SNHG9
3.05481e-34	0.530893	0.418	0.681	2.67781e-29	Recently activated CD4 T cells	ZFP36L2
9.02671e-32	0.549135	0.122	0.204	7.91272e-27	Recently activated CD4 T cells	SOCS1
2.62411e-29	0.309809	0.145	0.216	2.30027e-24	Recently activated CD4 T cells	GZMK
1.78926e-27	0.441011	0.409	0.633	1.56845e-22	Recently activated CD4 T cells	JUN
9.56525e-27	0.505659	0.14	0.218	8.38481e-22	Recently activated CD4 T cells	LRRC75A.AS1
7.59392e-26	0.315548	0.082	0.143	6.65675e-21	Recently activated CD4 T cells	LIME1
1.38262e-24	0.346632	0.39	0.565	1.21199e-19	Recently activated CD4 T cells	FOS
2.49116e-24	0.584164	0.425	0.699	2.18373e-19	Recently activated CD4 T cells	TSC22D3
5.93994e-24	0.481728	0.4	0.614	5.20689e-19	Recently activated CD4 T cells	DUSP1
1.1018e-23	0.318767	0.074	0.123	9.65831e-19	Recently activated CD4 T cells	LINC00861
2.00918e-22	0.451867	0.322	0.485	1.76123e-17	Recently activated CD4 T cells	CD69
9.3386e-20	0.899743	0.237	0.332	8.18613e-15	Recently activated CD4 T cells	CCL4
8.19294e-19	0.290667	0.074	0.113	7.18185e-14	Recently activated CD4 T cells	RP3.340B19.2
1.78075e-18	0.501009	0.077	0.123	1.56099e-13	Recently activated CD4 T cells	SPNS1
7.96138e-18	0.610899	0.447	0.71	6.97887e-13	Recently activated CD4 T cells	JUNB
2.59295e-15	1.12114	0.204	0.18	2.27295e-10	Recently activated CD4 T cells	MT.RNR2
4.21751e-14	0.341029	0.099	0.141	3.69703e-09	Recently activated CD4 T cells	RP11.543P15.1
9.49183e-14	0.693605	0.301	0.437	8.32044e-09	Recently activated CD4 T cells	DUSP2
2.73427e-13	0.508213	0.136	0.2	2.39683e-08	Recently activated CD4 T cells	PCED1B.AS1
1.00025e-12	0.65322	0.132	0.116	8.76813e-08	Recently activated CD4 T cells	RPL21P28
1.02105e-11	0.409712	0.201	0.231	8.95046e-07	Recently activated CD4 T cells	RNR1
2.0325e-11	0.532836	0.358	0.522	1.78167e-06	Recently activated CD4 T cells	IFITM1
2.30028e-10	0.488833	0.085	0.12	2.0164e-05	Recently activated CD4 T cells	KMT2E.AS1
6.86474e-09	0.310346	0.318	0.248	0.000601756	Recently activated CD4 T cells	RNR2

## Sheet: Naive-memory CD4 T cells
p_val	avg_logFC	pct.1	pct.2	p_val_adj	cluster	gene
0	0.499176	0.926	0.919	0	Naive-memory CD4 T cells	RPS29
1.96898e-248	0.394768	0.935	0.949	1.72599e-243	Naive-memory CD4 T cells	RPS12
1.05021e-234	0.387549	0.904	0.928	9.20607e-230	Naive-memory CD4 T cells	RPL34
1.66902e-226	0.425251	0.92	0.94	1.46305e-221	Naive-memory CD4 T cells	RPLP2
3.92386e-226	0.352576	0.914	0.93	3.43962e-221	Naive-memory CD4 T cells	RPS27A
1.13373e-193	0.330962	0.932	0.954	9.93813e-189	Naive-memory CD4 T cells	RPL13
2.71866e-176	0.328331	0.907	0.932	2.38315e-171	Naive-memory CD4 T cells	RPL30
2.0907e-172	0.358414	0.892	0.918	1.83268e-167	Naive-memory CD4 T cells	RPL37
2.04707e-169	0.324618	0.895	0.922	1.79444e-164	Naive-memory CD4 T cells	RPS15A
1.34832e-164	0.326186	0.889	0.929	1.18193e-159	Naive-memory CD4 T cells	RPL32
2.7495e-163	0.305392	0.901	0.936	2.41018e-158	Naive-memory CD4 T cells	RPS14
5.42859e-163	0.30045	0.883	0.924	4.75864e-158	Naive-memory CD4 T cells	RPS3
1.74107e-153	0.311683	0.884	0.932	1.52621e-148	Naive-memory CD4 T cells	RPL11
1.70075e-150	0.373574	0.832	0.876	1.49086e-145	Naive-memory CD4 T cells	RPS21
9.94077e-140	0.266304	0.899	0.939	8.71398e-135	Naive-memory CD4 T cells	RPL19
1.53119e-137	0.274413	0.913	0.944	1.34223e-132	Naive-memory CD4 T cells	RPS19
2.65008e-135	0.306004	0.876	0.92	2.32303e-130	Naive-memory CD4 T cells	RPS4X
7.42585e-133	0.286978	0.897	0.935	6.50942e-128	Naive-memory CD4 T cells	RPS18
7.02941e-126	0.305625	0.847	0.895	6.16191e-121	Naive-memory CD4 T cells	RPS25
2.30074e-124	0.325797	0.87	0.919	2.01681e-119	Naive-memory CD4 T cells	RPS6
3.51722e-121	0.587484	0.476	0.374	3.08316e-116	Naive-memory CD4 T cells	IL7R
2.04615e-120	0.327181	0.884	0.917	1.79364e-115	Naive-memory CD4 T cells	RPS27
6.62457e-118	0.515817	0.763	0.821	5.80703e-113	Naive-memory CD4 T cells	RPL31
8.00512e-116	0.287644	0.844	0.898	7.01721e-111	Naive-memory CD4 T cells	RPL35A
2.1094e-107	0.417208	0.759	0.828	1.84908e-102	Naive-memory CD4 T cells	RPL38
1.47502e-100	0.323936	0.781	0.859	1.29299e-95	Naive-memory CD4 T cells	RPL5
1.96819e-100	0.263538	0.884	0.928	1.72529e-95	Naive-memory CD4 T cells	RPS8
8.77515e-100	0.279608	0.846	0.895	7.69221e-95	Naive-memory CD4 T cells	RPL26
7.08957e-93	0.296084	0.799	0.877	6.21465e-88	Naive-memory CD4 T cells	RPL36
2.50282e-86	0.278854	0.838	0.891	2.19395e-81	Naive-memory CD4 T cells	RPL23A
4.96709e-84	0.451094	0.775	0.838	4.3541e-79	Naive-memory CD4 T cells	RPL27A
7.74931e-83	0.265743	0.791	0.874	6.79297e-78	Naive-memory CD4 T cells	RPL35
1.15144e-78	0.255487	0.861	0.921	1.00934e-73	Naive-memory CD4 T cells	RPL10
3.40935e-78	0.258078	0.795	0.879	2.9886e-73	Naive-memory CD4 T cells	RPL14
2.45511e-75	0.668494	0.213	0.115	2.15213e-70	Naive-memory CD4 T cells	RP5.857K21.7
1.04059e-71	0.792747	0.298	0.203	9.12174e-67	Naive-memory CD4 T cells	MTATP6P1
1.76598e-70	0.742241	0.247	0.147	1.54804e-65	Naive-memory CD4 T cells	MTND4P12
3.5778e-70	0.625068	0.246	0.144	3.13626e-65	Naive-memory CD4 T cells	hsa.mir.6723
9.65883e-70	0.927817	0.219	0.132	8.46684e-65	Naive-memory CD4 T cells	RP11.543P15.1
8.25411e-69	0.63216	0.194	0.103	7.23547e-64	Naive-memory CD4 T cells	RP11.475J5.4
2.66576e-66	0.718081	0.3	0.207	2.33678e-61	Naive-memory CD4 T cells	MTRNR2L2
5.24367e-66	0.372341	0.555	0.451	4.59655e-61	Naive-memory CD4 T cells	CCL5
2.62146e-65	0.31614	0.815	0.881	2.29795e-60	Naive-memory CD4 T cells	RPL37A
7.26693e-62	0.599865	0.203	0.112	6.37012e-57	Naive-memory CD4 T cells	RP11.750B16.1
2.73685e-61	0.961794	0.247	0.158	2.3991e-56	Naive-memory CD4 T cells	MTND2P28
9.68405e-61	0.750775	0.246	0.162	8.48894e-56	Naive-memory CD4 T cells	EEF1A1P5
3.13071e-57	0.275331	0.754	0.844	2.74435e-52	Naive-memory CD4 T cells	RPL27
1.14705e-54	0.75563	0.247	0.164	1.00549e-49	Naive-memory CD4 T cells	MTND1P23
1.68383e-52	0.264848	0.773	0.865	1.47603e-47	Naive-memory CD4 T cells	RPL3
3.4157e-52	0.812686	0.162	0.092	2.99417e-47	Naive-memory CD4 T cells	RP11.1035H13.3
7.16339e-51	0.688156	0.132	0.071	6.27935e-46	Naive-memory CD4 T cells	AP000936.1
1.68059e-47	0.651839	0.267	0.187	1.47319e-42	Naive-memory CD4 T cells	MTRNR2L1
1.13606e-46	0.692939	0.191	0.128	9.9586e-42	Naive-memory CD4 T cells	RP11.3P17.3
3.54864e-46	0.665367	0.179	0.103	3.1107e-41	Naive-memory CD4 T cells	RP5.857K21.11
1.33299e-44	0.251151	0.735	0.837	1.16849e-39	Naive-memory CD4 T cells	RPL10A
3.72641e-43	0.730054	0.149	0.086	3.26653e-38	Naive-memory CD4 T cells	SNORA52
1.91927e-42	0.622673	0.109	0.055	1.68241e-37	Naive-memory CD4 T cells	SNORD100
3.37866e-42	0.643287	0.151	0.093	2.9617e-37	Naive-memory CD4 T cells	RPL13AP25
2.81427e-41	0.613091	0.163	0.106	2.46696e-36	Naive-memory CD4 T cells	RP3.340B19.2
3.89009e-36	0.517089	0.102	0.059	3.41002e-31	Naive-memory CD4 T cells	RP11.40C6.2
2.11438e-35	0.420344	0.632	0.712	1.85344e-30	Naive-memory CD4 T cells	RPS20
6.67851e-33	0.622652	0.123	0.073	5.85431e-28	Naive-memory CD4 T cells	RPL9P3
7.31068e-32	0.448572	0.551	0.58	6.40847e-27	Naive-memory CD4 T cells	TXNIP
3.31545e-31	0.521831	0.135	0.088	2.90629e-26	Naive-memory CD4 T cells	CTB.36O1.7
2.95652e-30	0.29515	0.739	0.834	2.59165e-25	Naive-memory CD4 T cells	RPS11
2.19766e-29	0.543354	0.11	0.065	1.92644e-24	Naive-memory CD4 T cells	RPS12P26
1.12776e-28	0.546722	0.138	0.092	9.88586e-24	Naive-memory CD4 T cells	RP1.278E11.3
1.88769e-28	0.595997	0.158	0.113	1.65473e-23	Naive-memory CD4 T cells	RP11.51O6.1
3.5491e-28	0.653136	0.211	0.165	3.11111e-23	Naive-memory CD4 T cells	RP11.234A1.1
6.97207e-27	0.541095	0.105	0.061	6.11165e-22	Naive-memory CD4 T cells	RP13.15M17.1
6.29188e-26	0.572553	0.16	0.115	5.5154e-21	Naive-memory CD4 T cells	CTD.2192J16.15
6.45238e-26	0.472043	0.115	0.082	5.65609e-21	Naive-memory CD4 T cells	RP11.112J1.1
2.09345e-24	0.36814	0.72	0.82	1.8351e-19	Naive-memory CD4 T cells	RPL13A
4.73241e-24	0.552743	0.16	0.126	4.14839e-19	Naive-memory CD4 T cells	RP11.864N7.2
6.55545e-24	0.521944	0.11	0.077	5.74644e-19	Naive-memory CD4 T cells	RPL39P3
8.87415e-24	0.259924	0.519	0.5	7.779e-19	Naive-memory CD4 T cells	CD3D
1.74995e-22	0.415456	0.177	0.137	1.53399e-17	Naive-memory CD4 T cells	TMSB4XP8
1.22919e-20	0.512374	0.195	0.16	1.07749e-15	Naive-memory CD4 T cells	RPL10P3
1.92677e-19	0.415785	0.237	0.214	1.68899e-14	Naive-memory CD4 T cells	KLRB1
1.55217e-18	0.455764	0.129	0.088	1.36062e-13	Naive-memory CD4 T cells	MTND5P11
3.68209e-18	0.313819	0.571	0.69	3.22769e-13	Naive-memory CD4 T cells	TOMM7
2.9763e-16	0.313628	0.502	0.515	2.609e-11	Naive-memory CD4 T cells	IFITM1
8.04079e-16	0.477483	0.142	0.11	7.04847e-11	Naive-memory CD4 T cells	RP11.742N3.1
1.31474e-15	0.376186	0.629	0.738	1.15249e-10	Naive-memory CD4 T cells	RPL23
4.28741e-15	0.384261	0.3	0.282	3.7583e-10	Naive-memory CD4 T cells	TRAC
6.31889e-15	0.329926	0.106	0.081	5.53908e-10	Naive-memory CD4 T cells	RP11.832N8.1
4.66293e-14	0.519218	0.188	0.163	4.08748e-09	Naive-memory CD4 T cells	RPL13P12
1.08503e-13	0.50666	0.192	0.162	9.51127e-09	Naive-memory CD4 T cells	AC016739.2
1.38304e-13	0.347423	0.494	0.58	1.21236e-08	Naive-memory CD4 T cells	RPL17
9.07669e-13	0.531574	0.16	0.138	7.95654e-08	Naive-memory CD4 T cells	RP11.466H18.1
1.74745e-11	0.40148	0.343	0.34	1.53179e-06	Naive-memory CD4 T cells	TRBC2
3.16784e-11	0.552335	0.18	0.161	2.7769e-06	Naive-memory CD4 T cells	RP11.425L10.1
4.56915e-10	0.400716	0.102	0.085	4.00527e-05	Naive-memory CD4 T cells	RPS3AP26
8.68469e-10	0.602417	0.334	0.327	7.61291e-05	Naive-memory CD4 T cells	MTRNR2L8
9.84517e-09	0.475591	0.136	0.124	0.000863018	Naive-memory CD4 T cells	RPL6P27
2.01769e-08	0.50583	0.18	0.164	0.00176869	Naive-memory CD4 T cells	RPL3P4
2.78955e-08	0.489527	0.139	0.121	0.00244529	Naive-memory CD4 T cells	AC004453.8
3.39494e-08	0.405744	0.122	0.103	0.00297597	Naive-memory CD4 T cells	RP11.889L3.1
4.55583e-08	0.33277	0.143	0.119	0.0039936	Naive-memory CD4 T cells	LINC00861
5.10612e-08	0.348507	0.198	0.197	0.00447598	Naive-memory CD4 T cells	PCED1B.AS1
1.63079e-07	0.448353	0.139	0.118	0.0142954	Naive-memory CD4 T cells	RPS2P5
3.59627e-07	0.386908	0.138	0.117	0.0315246	Naive-memory CD4 T cells	TCF7

[truncated: 15 more sheets: Central memory CD4 T cells, Pre-exhausted CD8 T cells, Cytotoxic CD8 T cells, Effector memory CD8 T cells, Terminally exhausted CD8 T cell, NK, SPP1 TAMs, M2 TAMs, Proinflamatory TAMs, Proliferative monocytes and mac, Monocytes, cDC, pDC, mDC, Mast cells]
