# Supplementary material for: A single-cell tumor immune atlas for precision oncology
Source: HighWire-hosted journal article supplement (doi:10.1101/gr.273300.120), 2021-09-21
Supplement: Supplemental_Table_S6.xlsx [file Supplemental_Table_S6.xlsx]

## Sheet: contrasts
Supplementary Table 6 | Contrast results of the statistical abundance testing with generalized linear models. The furthest the “odds ratio” value is from one, the more abundant a cell type is in the corresponding cluster. P-values filtered to < 0.01.
contrast	cell_type	odds.ratio	p.value
all vs cluster 1	Prolif. B cells	0.214277	2.90552e-06
all vs cluster 1	Plasma B	0.555488	3.23304e-33
all vs cluster 1	Recently act. CD4	0.091205	0
all vs cluster 1	Naive mem. CD4	0.192858	0
all vs cluster 1	Trans. mem. CD4	0.838661	0.00486155
all vs cluster 1	Eff. mem. CD8	0.228873	0
all vs cluster 1	Prolif. mono. and TAMs	0.245102	2.16423e-14
all vs cluster 1	mDC	0.571668	2.89746e-16
all vs cluster 2	T Naive	0.518873	0
all vs cluster 2	T Reg.	0.638983	1.79071e-193
all vs cluster 2	T helper	0.731683	5.02742e-45
all vs cluster 2	Prolif. T	0.507815	1.74039e-151
all vs cluster 2	Pre-exh. CD8	0.558993	1.34715e-41
all vs cluster 2	Cyt. CD8	0.291495	0
all vs cluster 2	Term. exh. CD8	0.428003	0
all vs cluster 2	NK	0.435714	1.13589e-234
all vs cluster 2	Proinf. TAMs	0.589627	2.18936e-82
all vs cluster 2	Monocytes	0.352064	0
all vs cluster 2	cDC	0.563523	1.12858e-27
all vs cluster 2	pDC	0.264684	1.83242e-123
all vs cluster 2	Mast	0.813273	7.68574e-06
all vs cluster 3	Macrophages SPP1	0.154966	0
all vs cluster 3	TAMs C1QC	0.352106	0
all vs cluster 3	Prolif. mono. and TAMs	0.366654	4.31812e-29
all vs cluster 3	mDC	0.81676	0.000159805
all vs cluster 4	Plasma B	0.115771	0
all vs cluster 4	mDC	0.785202	0.000940062
all vs cluster 5	Eff. mem. CD4	0.339053	0
all vs cluster 5	Pre-exh. CD8	0.715178	2.94226e-08
all vs cluster 5	Term. exh. CD8	0.770163	6.95434e-41
all vs cluster 6	B cells	0.0841954	0
all vs cluster 6	Prolif. B cells	0.156023	2.97249e-66
all vs cluster 6	Naive mem. CD4	0.830459	7.84081e-22
all vs cluster 6	Trans. mem. CD4	0.425696	1.24432e-121
all vs cluster 6	TAMs C1QC	0.628552	9.58479e-81
all vs cluster 6	cDC	0.770173	5.047e-05
all vs cluster 6	mDC	0.87808	0.00103178
